# Supplementary material for: Genome-wide identification of phospho-regulators of Wnt signaling inDrosophila
Source: Oxford University Press journal article supplement (doi:10.1242/dev.116715), 2015-04-07

## FIGURE LEGENDS

Fig. S1 Kinases and kinase-associated factors assayed in screen

All genes (sorted by CG number) encoding either kinases or associated factors for which UAS-controlled inverted repeat strains were tested. Kinase group and family is indicated, as well as human orthologs.

Fig. S2 Phosphatases and Phosphatase-associated factors assayed in screen

All genes (sorted by CG number) encoding either phosphatase or associated factors for which UAS-controlled inverted repeat strains were tested. Phosphatase group and family is indicated, as well as human orthologs.

Fig. S3 Wnt pathway pilot screen in the *Drosophila* wing disc.

Graphical summary of the Wnt pathway pilot screen in the wing disc that displays whether knock-down of pathway components decreased (green), increased (red), or had no effect (black) on the levels of the ligand and downstream targets. A subset of known components of the Wnt pathway were knocked-down using *dpp-Gal4* and *hh-Gal4* in the wing disc to evaluate their effects on the levels of Sens, Dll, and Wg. Knock-down of *lacZ* (negative control) did not affect the levels of Sens, Dll, or Wg. Knock-down of the positive regulator *porcupine* (*por*) resulted in a decrease of Sens and Dll levels (arrowheads) in the ligand-receiving cells due to the impaired secretion of Wg (arrow) (detected as an increase in levels) from the ligand-producing cells. Knock-down of the negative regulator *Axn* resulted in increased levels of Sens and Dll (arrowheads) in the ligand-receiving cells, but had no effect on Wg levels. Knock-down of the ligand *wg* resulted in the loss of Wg (arrow) in the ligand-producing cells and a corresponding loss of Sens and Dll (arrowheads) in the ligand-receiving cells.

Fig. S4 Results of primary and secondary screening of kinome

Results obtained with indicated RNAi lines in crosses indicated in top line of table, under primary screen and secondary screen headings. Blank infill indicates that there was no change in targets in primary screen. Black infill means there was no change observed in in that particular assay although there was an effect either with another readout or another RNAi line corresponding to the same gene. Coloured infill represents changes to readouts as indicated in legend. Genes that were tested in secondary screen are highlighted by lines above and below the gene. Adult phenotypes (if observed) are indicated. Any indicated lethality occurred after third instar, thus allowing larval discs to be examined. Transgenic RNAi Project strains are in blue font, while National Institute of Genetics (NIG) strains have the letter R in the stock number. All other strains are from Vienna Drosophila RNAi Center (VDRC).

Fig. S5 Results of primary and secondary screening of phosphatome

Results obtained with indicated RNAi lines in crosses indicated in top line of table, under primary screen and secondary screen headings. Blank infill indicates that there was no change in targets in primary screen. Black infill means there was no change observed in in that particular assay although there was an effect either with another readout or another RNAi line corresponding to the same gene. Coloured infill represents changes to readouts as indicated in legend. Genes that were tested in secondary screen are highlighted by lines above and below the gene. Adult phenotypes (if observed) are indicated. Any indicated lethality occurred after third instar, thus allowing larval discs to be examined. Transgenic RNAi Project strains are in blue font, while National Institute of Genetics (NIG) strains have the letter R in the stock number. All other strains are from Vienna Drosophila RNAi Center (VDRC).

Fig. S6 Signaling at the dorsal/ventral compartment boundary of the *Drosophila* wing disc. The Notch pathway signals from non-boundary cells to induce expression of the target genes *wg* (red) and *ct* (orange) in cells at the dorsal/ventral compartment boundary of the wing disc. Wg that is subsequently produced from cells at the dorsal/ventral compartment boundary induces the nested expression of the target genes *sens* (blue) and *Dll* (grey) in non-boundary cells that receive the ligand. The expression domains of *dpp-Gal4*, *hh-Gal4*, and *C5-Gal4* in the wing disc relative to boundary and non-boundary cells are shown in green.

Fig. S7 Identification of phospho-regulators of the Notch pathway.

(A) 36 kinases (and associated factors) [left column] and 32 phosphatases (and associated factors) [right column] of the 590 phospho-regulators screened in the wing disc were shown to regulate the Notch pathway and the levels of Wg and Ct. (B) All 68 phospho-regulators identified positively (blue) regulate the Notch pathway. (C) The kinase and phosphatase groups are displayed in a graphical summary, and family names are as defined in Figs. S1 and S2.

Fig.S8 Identification of phospho-regulators of the Hh pathway.

(A) *MS1096-Gal4* is expressed throughout the central region of the wing disc, but displays stronger expression in the dorsal half. Knock-down of *lacZ* (negative control) using *MS109-Gal4* did not affect Ci or Ptc levels. (B) 66 of the 90 candidates of the Wnt pathway also regulated the Hh pathway to either promote (21; blue) or inhibit (45; yellow) signaling in the

wing disc. 24 candidates of the Wnt pathway did not affect (black) the Hh pathway in the wing disc.

Fig.S9 Effects of *cdc37* and *gish* in the wing disc

(A) Relative to the knock-down of *lacZ* (negative control), knock-down of *Cdc37* with *MS1096-Gal4* in the wing disc resulted in increased levels of expression of the Hh pathway target *dpp-lacZ* (arrowheads) as detected by anti- $\beta$ -gal. (B) The *dpp-Gal4* driver is expressed along the anterior/posterior compartment boundary of the wing disc (green). Knock-down of *cdc37* with *dpp-Gal4* increases the levels of PH3 (white). (C) The *hh-Gal4* driver is expressed in the posterior compartment of the wing disc (green). Knock-down of *gish* with *hh-Gal4* did not affect DI (red) or Casp 3 levels (white).

Fig S1

**Classifications of kinases and associated factors**

|                                       |                                                         |
|---------------------------------------|---------------------------------------------------------|
| AGC                                   | Named after Protein Kinase A, G, and C families         |
| Tyrosine Kinase-Like                  |                                                         |
| STE                                   | Homologs of the yeast STE7, STE11 and STE20 genes       |
| Casein Kinase 1                       |                                                         |
| Protein Kinase-Like                   |                                                         |
| CMGC                                  | Named after a set of families (CDK, MAPK, GSK3 and CLK) |
| Tyrosine Kinase                       |                                                         |
| Receptor Guanylate Cyclase            |                                                         |
| Calcium & Calmodulin-regulated Kinase |                                                         |
| Atypical                              |                                                         |
| Other                                 |                                                         |
| Unclassified                          | Diverse group of kinases and candidate kinases          |
| Kinase-associated                     | Co-factors such as cyclins                              |
| Non-protein Kinase                    | Such as lipid and sugar kinases                         |

| Kinase Gene       |             |                                           | Gene Group         | Gene Family  | Human ortholog(s)            |
|-------------------|-------------|-------------------------------------------|--------------------|--------------|------------------------------|
| Annotation Symbol | Gene Symbol | Gene Name                                 |                    |              |                              |
| CG10023           | Fak56D      | Focal adhesion kinase                     | TK                 | FAK          | PTK2, PTK2B                  |
| CG10033           | for         | foraging                                  | AGC                | PKG          | PRKG1, PRKG2                 |
| CG10079           | Egfr        | Epidermal growth factor receptor          | TK                 | EGFR         | ERBB2, ERBB4, EGFR, ERBB3    |
| CG10082           |             |                                           | Non-Protein Kinase | Lipid Kinase |                              |
| CG10155           | Spred       | Sprouty-related protein with EVH-1 domain | Kinase-associated  |              | SPRED3, SPRED2, SPRED1       |
| CG10177           |             |                                           | CAMK               | DCAMKL       |                              |
| CG10244           | Cad96Ca     | Cadherin 96Ca                             | TK                 |              |                              |
| CG10260           |             |                                           | PKL                |              | PI4KA                        |
| CG10268           |             |                                           | Unclassified       |              | PMVK                         |
| CG10295           | Pak         | PAK-kinase                                | STE                | STE20        | PAK3, PAK2, PAK1             |
| CG10308           | CycJ        | Cyclin J                                  | CMGC               | CDK          |                              |
| CG10498           | cdc2c       | cdc2c                                     | CMGC               | CDK          | CDK1, CDK2, CDK3             |
| CG10504           | Ilk         | Integrin linked kinase                    | TKL                | MLK          | ILK                          |
| CG10522           | sticky      |                                           | AGC                | DMPK         | CIT                          |
| CG10539           | S6k         | RPS6-p70-protein kinase                   | AGC                | RSK          | RPS6KB1                      |
| CG10572           | Cdk8        | Cyclin-dependent kinase 8                 | CMGC               | CDK          | CDK8, CDK19                  |
| CG10579           | Eip63E      | Ecdysone-induced protein 63E              | CMGC               | CDK          | CDK16, CDK14, CDK18          |
| CG10637           | Nak         | Numb-associated kinase                    | Other              | NAK          | BMP2KL, BMP2K, AAK1          |
| CG10673           |             |                                           | Other              | Bud32        | TP53RK                       |
| CG10702           |             |                                           | Kinase-associated  |              |                              |
| CG10738           |             |                                           | RGC                | RGC          | NPR2, NPR1                   |
| CG10776           | wit         | wishful thinking                          | TKL                | STKR         | BMPR2, ACVR2A, TGFB2, ACVR2B |
| CG10895           | lok         | loki                                      | CAMK               | RAD53        | CHEK2                        |
| CG10933           |             |                                           | Kinase-associated  |              |                              |
| CG10951           | niki        | nimA-like kinase                          | Other              | NEK          |                              |
| CG10967           | Atg1        | Autophagy-specific gene 1                 | Other              | ULK          |                              |

|         |         |                                       |                    |                     |                                                |
|---------|---------|---------------------------------------|--------------------|---------------------|------------------------------------------------|
| CG1098  | Madm    | MLF1-adaptor molecule                 | Other              | NRBP                | NRBP1, NRBP2                                   |
| CG1107  | aux     | auxillin                              | Other              | NAK                 | DNAJC6, GAK                                    |
| CG11221 |         |                                       | Other              | NKF1                |                                                |
| CG11228 | hpo     | hippo                                 | STE                | STE20               | STK3, STK4                                     |
| CG11249 |         |                                       | Non-Protein Kinase | Carbohydrate Kinase | Pyruvate Kinase                                |
| CG11255 |         |                                       | Non-Protein Kinase | Carbohydrate Kinase | ADK                                            |
| CG11420 | png     | pan gu                                | Other              |                     |                                                |
| CG11486 |         |                                       | Kinase-associated  |                     | PAN3                                           |
| CG11489 | srpk79D | serine-arginine protein kinase at 79D | CMGC               | SRPK                | SRPK1, SRPK3, SRPK2                            |
| CG11525 | CycG    | Cyclin G                              | CMGC               | CDK                 |                                                |
| CG11533 | Asator  | Asator                                | CK1                | TTBK                | TTBK1, TTBK2                                   |
| CG11594 |         |                                       | Non-Protein Kinase | Carbohydrate Kinase | FGGY                                           |
| CG11621 | Pi3K68D | Phosphatidylinositol 3 kinase 68D     | Non-Protein Kinase | Lipid Kinase        | PIK3C2G, PIK3C2A, PIK3C2B                      |
| CG11660 |         |                                       | Atypical           | RIO                 | RIOK3, RIOK1                                   |
| CG11811 |         |                                       | Non-Protein Kinase | Nucleic Acid Kinase | GUK1                                           |
| CG11859 |         |                                       | Atypical           | RIO                 | RIOK2                                          |
| CG12019 | Cdc37   | Cdc37                                 | Kinase-associated  |                     | CDC37                                          |
| CG12066 | Pka-C2  | cAMP-dependent protein kinase 2       | AGC                | PKA                 | PRKACB                                         |
| CG12069 |         |                                       | AGC                | PKA                 |                                                |
| CG12072 | warts   | warts                                 | AGC                | NDR                 | LATS2, LATS1                                   |
| CG1210  | Pdk1    | Phosphoinositide-dependent kinase 1   | AGC                | PDK1                | PDPK1, PDPK2                                   |
| CG12147 |         |                                       | CK1                | CK1                 |                                                |
| CG1216  | mri     | mrityu                                | Kinase-associated  |                     | KCTD20, BTBD10                                 |
| CG12229 |         |                                       | Non-Protein Kinase | Carbohydrate Kinase | Pyruvate Kinase                                |
| CG12244 | lic     | licorne                               | STE                | STE7                | MAP2K4, MAP2K6, MAP2K3                         |
| CG1227  |         |                                       | Other              | NAK                 | STK16                                          |
| CG12289 |         |                                       | Non-Protein Kinase | Carbohydrate Kinase | KHK                                            |
| CG12306 | polo    | polo                                  | Other              | PLK                 | PLK3, PLK2, PLK1                               |
| CG12559 | rl      | rolled                                | CMGC               | MAPK                | MAPK3, MAPK1                                   |
| CG1271  |         |                                       | Non-Protein Kinase | Lipid Kinase        | GK5                                            |
| CG13369 |         |                                       | Non-Protein Kinase | Carbohydrate Kinase | RBKS                                           |
| CG13388 | Akap200 | A kinase anchor protein 200           | Kinase-associated  |                     | UNC79                                          |
| CG1344  |         |                                       | Other              | SCY1                | SCYL3                                          |
| CG13591 | Ssl     | Suppressor of Stellate-like           | CMGC               |                     | CSNK2B                                         |
| CG1362  | cdc2rk  | cdc2-related-kinase                   | CMGC               | CDK                 | CDC2L2                                         |
| CG13688 | lpk2    | lpk2                                  | PKL                | IPK                 | IPMK                                           |
| CG1389  | tor     | torso                                 | Atypical           | PIKK                |                                                |
| CG14026 | tkv     | thickveins                            | TKL                | STKR                | ACVR1, BMPR1A, ACVR1C, BMPR1B, ACVR1.1, ACVR1B |
| CG14030 | Bub1    | Bub1 homologue                        | Other              | BUB                 | BUB1                                           |
| CG14217 | Tao     | Tao                                   | STE                | STE20               | TAOK1, TAOK2, TAOK3                            |
| CG14305 |         |                                       | CAMK               | TSSK                | TSSK6, TSSK2, TSSK4, TSSK3, TSSK1              |

## Kinases and Associated factors

|         |               |                                                 |                    |                     |                                                                |
|---------|---------------|-------------------------------------------------|--------------------|---------------------|----------------------------------------------------------------|
| CG14396 | Ret           | Ret oncogene                                    | TK                 | Ret                 | FGFR4, FGFR1, FGFR3, RET, FGFR2                                |
| CG14895 | Pak3          | Pak3                                            | STE                | STE20               | PAK3, PAK1, PAK2                                               |
| CG14939 | CycY          | Cyclin Y                                        | CMGC               | CDK                 | CCNYL2, CCNY, CCNYL1, CCNYL3                                   |
| CG1495  | CaMK1         | Calcium/calmodulin-dependent protein kinase I   | CAMK               | CAMK1               | PSKH2, CAMK4, CAMK1D, CAMK1D, PSKH1, PNCK, CAMK1               |
| CG14992 | Ack           | Activated Cdc42 kinase                          | TK                 | Ack                 | TNK2, TNK1                                                     |
| CG1511  | Eph           | Eph receptor tyrosine kinase                    | TK                 | Eph                 | EPHB6, EPHB3, EPHA1, EPHA10, EPHA4, EPHB2, EPHA8, EPHA2        |
| CG15218 | CycK          | Cyclin K                                        | CMGC               | CDK                 | CCNK                                                           |
| CG15224 | CklI $\beta$  | Casein kinase II $\beta$ subunit                | CMGC               | CK2                 | CSNK2B                                                         |
| CG15547 |               |                                                 | Non-Protein Kinase | Nucleic Acid Kinase |                                                                |
| CG15793 | Dsor1         | Downstream of raf1                              | STE                | STE7                | MAP2K1, MAP2K2                                                 |
| CG15862 | Pka-R2        | cAMP-dependent protein kinase R2                | AGC                | PKA                 | PRKAR2A, PRKAR2B                                               |
| CG1594  | hop           | hopscotch                                       | TK                 | Jak                 |                                                                |
| CG1609  | Gcn2          | Gcn2                                            | Other              | PEK                 | EIFA2K4                                                        |
| CG16708 | Cerk          | Ceramide kinase                                 | Non-Protein Kinase | Lipid Kinase        | CERK                                                           |
| CG16903 |               |                                                 | Kinase-associated  |                     | CCNL1, CCNL2                                                   |
| CG16910 | key           | kenny                                           | Kinase-associated  |                     |                                                                |
| CG16973 | msn           | misshapen                                       | STE                | STE20               | MINK1, MAP4K4, TNIK                                            |
| CG17010 |               |                                                 | Non-Protein Kinase | Carbohydrate Kinase | RBKS                                                           |
| CG17090 | hipk          | homeodomain interacting protein kinase          | CMGC               | DYRK                | HIPK1, HIPK2, HIPK3                                            |
| CG17146 | Adk1          | Adenylate kinase-1                              | Non-Protein Kinase | Nucleic Acid Kinase | AK1, AK5                                                       |
| CG17161 | grp           | grapes                                          | CAMK               | CAMKL               | CHEK1                                                          |
| CG17216 | KP78b         | KP78b                                           | CAMK               | CAMKL               | MARK2, MARK4, MARK3, MARK1                                     |
| CG17245 | plexB         | plexin B                                        | Kinase-associated  |                     | PLXNA3, PLXNB1, PLXNA1, PLXND1, PLXNA4, PLXNB3, PLXNB2, PLXNA2 |
| CG1725  | dlg1          | discs large 1                                   | Kinase-associated  |                     | DLG3, DLG2, DLG4, DLG1                                         |
| CG17256 | Nek2          | Nek2                                            | Other              | NEK                 | NEK7, NEK2, NEK6                                               |
| CG17299 | SNF4Ay        | SNF4/AMP-activated protein kinase gamma subunit | PKL                | PIPK                | PRKAG1, PRKAG2, PRKAG3                                         |
| CG17342 | Lk6           | Lk6                                             | CAMK               | MAPKAPK             | MKNK2                                                          |
| CG17348 | drl           | derailed                                        | TK                 | Ryk                 | RYK, TYRO, AXL, MERTK                                          |
| CG1747  | Sk1           | Sphingosine kinase 1                            | Non-Protein Kinase | Lipid Kinase        | SPHK1, SPHK2                                                   |
| CG17471 |               |                                                 | PKL                | PIPK                | PIP4K2B, PIP4K2C, PIP4K2A                                      |
| CG17520 | CklI $\alpha$ | casein kinase II $\alpha$                       | CMGC               | CK2                 | CSNK2A1, CSNK2A2                                               |
| CG17528 |               |                                                 | CAMK               | DCAMKL              | DCX, DCLK3, DCLK1, DCLK2                                       |
| CG17559 | dnt           | doughnut on 2                                   | TK                 | Ryk                 | RYK, TYRO3, AXL, MERTK                                         |
| CG17596 | S6kII         | Ribosomal protein S6 kinase II                  | AGC                | RSK                 | RPS6KA6, RPS6KA5, RPS6KA4, RPS6KA3, RPS6KA2, RPS6KA1           |
| CG17603 | Taf1          | TBP-associated factor 1                         | Atypical           | TAF1                | TAF1L, TAF1                                                    |
| CG17698 |               |                                                 | Other              | CAMKK               | CAMKK1, CAMKK2                                                 |
| CG1772  | dap           | dacapo                                          | Kinase-associated  |                     | CDKN1B                                                         |
| CG17998 | Gprk2         | G protein-coupled receptor kinase 2             | AGC                | GRK                 | GRK4, GRK5, GRK6                                               |
| CG18069 | CaMKII        | Calcium/calmodulin-dependent protein kinase II  | CAMK               | CAMK2               | CAMK2A, CAMK2D, CAMK2B, CAMK2G                                 |
| CG18085 | sev           | sevenless                                       | TK                 | Sev                 | ROS1                                                           |

## Kinases and Associated factors

|         |                 |                                            |                    |                     |                                             |
|---------|-----------------|--------------------------------------------|--------------------|---------------------|---------------------------------------------|
| CG18247 | shark           | SH2 ankyrin repeat kinase                  | TK                 | Syk                 |                                             |
| CG18255 | Strn-Mlck       | Stretchin-Mlck                             | CAMK               | MLCK                | MYLK4, MYLK2, MYLK, MYLK3                   |
| CG1830  | PhKy            | Phosphorylase kinase $\gamma$              | CAMK               | PHK                 | PHKG2                                       |
| CG18374 | Gyk             | Glycerol kinase                            | Non-Protein Kinase | Lipid Kinase        | GK, GK2                                     |
| CG18402 | InR             | Insulin-like receptor                      | TK                 | InsR                | IGF1R                                       |
| CG1848  | LIMK1           | LIM-kinase1                                | TKL                | LISK                | LIMK1, LIMK2                                |
| CG18492 | Tak1            | TGF- $\beta$ activated kinase 1            | TKL                | MLK                 | MAP3K7                                      |
| CG1851  | Ady43A          | Ady43A                                     | Non-Protein Kinase | Nucleic Acid Kinase |                                             |
| CG18582 | mbt             | mushroom bodies tiny                       | STE                | STE20               | PAK6, PAK4, PAK7                            |
| CG18854 |                 |                                            | Non-Protein Kinase | Lipid Kinase        |                                             |
| CG1891  | sax             | saxophone                                  | TKL                | STKR                | ACVR1, BMPR1A, ACVR1C, BMPR1B, ACVRL1       |
| CG1915  | sls             | sallimus                                   | Kinase-associated  |                     | TTN                                         |
| CG1939  | Dpck            | Dephospho-CoA kinase                       | Unclassified       |                     | DCAKD                                       |
| CG1951  |                 |                                            | Other              | SCY1                | SCYL2                                       |
| CG1954  | Pkc98E          | Protein C kinase 98E                       | AGC                | PKC                 | PRKCG, PRKCB, PRKCE, PRKCQ, PRKCA, PRKCH,   |
| CG1973  | yata            | yata                                       | Other              | SCY1                | SCYL1                                       |
| CG2028  | Ckl $\alpha$    | Casein kinase I $\alpha$                   | CK1                | CK1                 | CSNK1A1, CSNK1D, CSNK1A1L, CSNK1E           |
| CG2048  | dco             | discs overgrown                            | CK1                | CK1                 | CSNK1A1, CSNK1D, CSNK1A1L, CSNK1E           |
| CG2049  | Pkn             | Protein kinase related to protein kinase N | AGC                | PKN                 | PKN2, PKN3, PKN1                            |
| CG2087  | PEK             | pancreatic eIF-2 $\alpha$ kinase           | Other              | PEK                 | EIF2AK3                                     |
| CG2201  |                 |                                            | Non-Protein Kinase | Lipid Kinase        | CHKB-CPT1B, CHKB                            |
| CG2210  | awd             | abnormal wing discs                        | Atypical           | NDK                 | NME4, NME2, NME1, NME1-NME2, NME3           |
| CG2246  |                 |                                            | Non-Protein Kinase | Carbohydrate Kinase | PRPSAP2, PRPSAP1                            |
| CG2252  | fs(1)h          | female sterile (1) homeotic                | Atypical           |                     | BRD2, BRD3, BRDT, BRD4                      |
| CG2272  | slpr            | slipper                                    | TKL                | MLK                 | RP5-862P8.2, MLTK, MAP3K9, MAP3K10, MAP3K11 |
| CG2577  |                 |                                            | CK1                | CK1                 | CSNK1E, CSNK1A1, CSNK1A1L, CSNK1D           |
| CG2615  | ik2             | I $\kappa$ B kinase-like 2                 | Other              | IKK                 | IKBKE, TBK1                                 |
| CG2621  | sgg             | shaggy                                     | CMGC               | GSK                 | GSK3B, GSK3A                                |
| CG2699  | Pi3K21B         | Pi3K21B                                    | PKL                | PIK                 | PIK3R3, PIK3R2, PIK3R1                      |
| CG2794  |                 |                                            | Non-Protein Kinase | Carbohydrate Kinase |                                             |
| CG2845  | phl             | pole hole                                  | TKL                | RAF                 | ARAF, BRAF, RAF1                            |
| CG2846  |                 |                                            | Non-Protein Kinase | Carbohydrate Kinase | RFK                                         |
| CG2899  | ksr             | kinase suppressor of ras                   | TKL                | RAF                 | KSR2, KSR1                                  |
| CG2929  | Pi4KII $\alpha$ | Pi4KII $\alpha$                            | PKL                | PIK                 | PI4K2A, PI4K2B                              |
| CG2964  |                 |                                            | Non-Protein Kinase | Carbohydrate Kinase | PKLR, PKM                                   |
| CG3001  | Hex-A           | Hexokinase A                               | Non-Protein Kinase | Carbohydrate Kinase | HK3, HK2, HKDC1, HK1                        |
| CG30021 | metro           | menage a trois                             | Non-Protein Kinase | Nucleic Acid Kinase | MPP4, MPP5, MPP7, MPP2, MPP1, MPP3          |
| CG3008  |                 |                                            | Atypical           | RIO                 | RIOK3, RIOK1                                |
| CG30184 |                 |                                            | Kinase-associated  |                     |                                             |
| CG30295 | lpk1            | lpk1                                       | PKL                |                     | IPPK                                        |
| CG3051  | SNF1A           | SNF1A/AMP-activated protein kinase         | CAMK               | CAMKL               | PRKAA1, PRKAA2                              |
| CG3068  | aur             | aurora                                     | Other              | Aur                 | AURKA, AURKB, AURKA                         |



## Kinases and Associated factors

|         |           |                                         |                    |                     |                                          |
|---------|-----------|-----------------------------------------|--------------------|---------------------|------------------------------------------|
| CG3006  | aur       | aurora                                  | Other              | Aur                 | AURKA, AURKB, AURKC                      |
| CG3086  | MAPK-Ak2  | MAP kinase activated protein-kinase-2   | CAMK               | MAPKAPK             | MAPKAPK2, MAPKAPK5, MAPKAPK3             |
| CG31003 | gskt      | gasket                                  | CMGC               | GSK                 | GSK3B, GSK3A                             |
| CG3105  | Pask      | PAS kinase                              | CAMK               | CAMKL               | PASK                                     |
| CG31097 |           |                                         | Unclassified       |                     |                                          |
| CG31127 | Wsck      | Wsck                                    | TK                 |                     |                                          |
| CG31140 |           |                                         | Non-Protein Kinase | Lipid Kinase        | DGKQ                                     |
| CG31183 |           |                                         | Kinase-associated  |                     | NPR2, NPR1                               |
| CG3127  | Pgk       | Phosphoglycerate kinase                 | Non-Protein Kinase | Lipid Kinase        | PGK1, PGK2                               |
| CG31349 | pyd       | polychaetoid                            | Kinase-associated  |                     | TJP2, TJP1, TJP3                         |
| CG3140  | Adk2      | Adenylate kinase-2                      | Non-Protein Kinase | Nucleic Acid Kinase | AK4, AK2, AK3                            |
| CG31421 | Tak1      | Tak1-like 1                             | TKL                |                     | MAP3K7                                   |
| CG31643 |           |                                         | Atypical           |                     | FASTKD1, TBRG4, FASTKD3, FASTK, FASTKD3  |
| CG3172  | twf       | twinfilin                               | TK                 |                     | TWF2, TWF1                               |
| CG31751 |           |                                         | Unclassified       |                     | AGPHD1                                   |
| CG31873 |           |                                         | Non-Protein Kinase | Lipid Kinase        | FLJ10842                                 |
| CG32019 | bt        | bent                                    | CAMK               |                     | MYLK4, MYLK2, MYLK3, MYLK                |
| CG32031 | Argk      | Arginine kinase                         | Unclassified       |                     | CKMT2, CKMT1A, CKMT1B, CKM, CKB          |
| CG32134 | btl       | breathless                              | TK                 |                     | FGFR4, FGFR1, FGFR3, RET, FGFR2          |
| CG3216  |           |                                         | RGC                | RGC                 | NPR2, NPR1                               |
| CG32417 | Myt1      | Myt1                                    | AGC                |                     | PKMYT1                                   |
| CG32484 | Sk2       | Sphingosine kinase 2                    | Non-Protein Kinase | Lipid Kinase        |                                          |
| CG32649 |           |                                         | Atypical           |                     | ADCK4, ADCK3                             |
| CG32666 | Drak      | Death-associated protein kinase related | CAMK               | MLCK                |                                          |
| CG32703 |           |                                         | CMGC               |                     | MAPK15                                   |
| CG32717 | sdt       | stardust                                | CAMK               |                     | CASK, MPP4, MPP5, MPP7, MPP2, MPP1, MPP3 |
| CG32742 | l(1)G0148 | lethal (1) G0148                        | Other              |                     | CDC7                                     |
| CG32743 | nonC      | no-on-and-no-off transient C            | PKL                |                     | SMG1                                     |
| CG3277  |           |                                         | TK                 | VEGFR               |                                          |
| CG32849 | Hex-t2    | Hex-t2                                  | Non-Protein Kinase | Carbohydrate Kinase | HK3, HK2, HKDC1, HK1                     |
| CG32944 |           |                                         | CAMK               |                     | STK32C, STK32B, STK32A                   |
| CG33102 | Hex-t1    | Hex-t1                                  | Non-Protein Kinase | Carbohydrate Kinase |                                          |
| CG33114 | Gyc32E    | Guanyl cyclase at 32E                   | RGC                |                     | NPR2, NPR1                               |
| CG3319  | Cdk7      | Cyclin-dependent kinase 7               | CMGC               | CDK                 | CDK7, CDK20                              |
| CG3324  | Pkg21D    | cGMP-dependent protein kinase 21D       | AGC                | PKG                 | PRKG2, PRKG1                             |
| CG33338 | p38c      | p38c                                    | CMGC               | MAPK                | MAPK12, MAPK13, MAPK14, MAPK11           |
| CG33519 | Unc-89    | Unc-89                                  | Unclassified       |                     |                                          |
| CG33531 | Ddr       | Discoidin domain receptor               | TK                 |                     | DDR1, DDR2                               |
| CG33554 | Nipped-A  | Nipped-A                                | Atypical           | PIKK                | TRRAP                                    |
| CG33671 |           |                                         | Non-Protein Kinase | Carbohydrate Kinase | MVK                                      |
| CG33981 |           |                                         | Kinase-associated  |                     | ANAPC13                                  |
| CG3400  | Pfrx      | 6-phosphofructo-2-kinase                | Non-Protein Kinase | Carbohydrate Kinase | PFKFB1, PFKFB2, PFKFB4, PFKFB3           |
| CG34344 | rdgA      | retinal degeneration A                  | Non-Protein Kinase | Lipid Kinase        | DGKZ, DGKI                               |
| CG34356 |           |                                         | Unclassified       |                     |                                          |
| CG34357 |           |                                         | RGC                |                     | NPR2, NPR1                               |
| CG34359 | IP3K2     | Inositol 1,4,5-triphosphate kinase 2    | Non-Protein Kinase | Lipid Kinase        | ITPK1                                    |
| CG34361 | Dgk       | Diacyl glycerol kinase                  | Non-Protein Kinase | Lipid Kinase        | DGKA, DGKG, DGKB                         |

|         |          |                                                      |                    |                     |                                          |
|---------|----------|------------------------------------------------------|--------------------|---------------------|------------------------------------------|
| CG34380 |          |                                                      | TK                 |                     | DDR1, DDR2                               |
| CG34384 |          |                                                      | Non-Protein Kinase | Lipid Kinase        | DGKH, DGKD                               |
| CG34392 | Epac     | Exchange protein directly activated by cAMP ortholog | Kinase-associated  |                     | RAPGEF5, RAPGEF3, RAPGEF4, RAPGEFL1      |
| CG34412 | tlk      | Tousled-like kinase                                  | Other              | TLK                 | TLK1, TLK2                               |
| CG3510  | CycB     | Cyclin B                                             | CMGC               | CDK                 | CCNB2, CCNB1                             |
| CG3525  | eas      | easily shocked                                       | Non-Protein Kinase | Lipid Kinase        | ETNK2, ETNK1                             |
| CG3534  |          |                                                      | Non-Protein Kinase | Carbohydrate Kinase | XYLB                                     |
| CG3544  |          |                                                      | Non-Protein Kinase | Carbohydrate Kinase | XYLB                                     |
| CG3608  |          |                                                      | Atypical           | ABC1                | ADCK1                                    |
| CG3682  | PIP5K59B | PIP5K59B                                             | PKL                |                     | PIP5K1A, PIP5K1B, PSMD4, PIP5K1C         |
| CG3738  | Cks30A   | Cyclin-dependent kinase subunit 30A                  | Kinase-associated  |                     | CKS2, CKS1B                              |
| CG3809  |          |                                                      | Non-Protein Kinase | Nucleic Acid Kinase | ADK                                      |
| CG3837  |          |                                                      | Kinase-associated  |                     |                                          |
| CG3915  | Drl-2    | Derailed 2                                           | TK                 | Ryk                 | RYK, TYRO3, AXL, MERTK                   |
| CG3938  | CycE     | Cyclin E                                             | CMGC               | CDK                 | CCNE2, CCNE1                             |
| CG4006  | Akt1     | Akt1                                                 | AGC                | Akt                 | SGK3, AKT1, SGK1, AKT2, SGK2, AKT3       |
| CG4007  | Nrk      | Neurospecific receptor kinase                        | TK                 | Musk                | MUSK, ROR1, ROR2                         |
| CG4012  | gek      | genghis khan                                         | AGC                | DMPK                | CDC42BPA, CDC42BPG, CDC42BPB             |
| CG40129 | Gprk1    | G protein-coupled receptor kinase 1                  | AGC                | GRK                 | ADRBK2, ADRBK1                           |
| CG4026  | IP3K1    | Inositol 1,4,5-triphosphate kinase 1                 | PKL                |                     | ITPKB, ITPKC, ITPKA                      |
| CG40293 | Stlk     | Ste20-like kinase                                    | STE                |                     | STRADA, STRADB                           |
| CG4032  | Abl      | Abl tyrosine kinase                                  | TK                 | Abl                 | ABL1, ABL2                               |
| CG4041  |          |                                                      | Other              | TBCK                | TBCK                                     |
| CG40478 | Dyrk3    | Dyrk3                                                | CMGC               | DYRK                | DYRK4, DYRK1B, DYRK1A, DYRK3, DYRK2      |
| CG4132  | pkaap    | pkaap                                                | Kinase-associated  |                     | AKAP10                                   |
| CG4141  | Pi3K92E  | PI3K92E                                              | PKL                |                     | PIK3CB, PIK3CD, PIK3CA, PIK3CG           |
| CG4201  | ird5     | immune response deficient 5                          | Other              | IKK                 | IKKBK, CHUK                              |
| CG42273 | mnb      | minibrain                                            | CMGC               | DYRK                | DYRK4, DYRK1B, DYRK1A, DYRK3, DYRK2      |
| CG42317 | Csk      | C-terminal Src kinase                                | TK                 | Csk                 | MATK, CSK                                |
| CG42320 | Doa      | Darkener of apricot                                  | CMGC               | CLK                 | CLK4, CLK2, CLK3, CLK1                   |
| CG42341 | Pka-R1   | cAMP-dependent protein kinase R1                     | AGC                | PKA                 | PRKAR1B, PRKAR1A                         |
| CG42347 |          |                                                      | CAMK               |                     | MYLK4, MYLK2, MYLK3                      |
| CG42349 | Pkcδ     | Protein kinase C δ                                   | AGC                | PKC                 | PRKCG, PRKCB, PRKCE, PRKCQ, PRKCA, PRKCH |
| CG42366 |          |                                                      | CMGC               | CDC2                | ICK, MAK                                 |
| CG42403 | Ca-β     | Ca <sup>2+</sup> -channel-protein-β-subunit          | Non-Protein Kinase | Nucleic Acid Kinase | CACNB3, CACNB1, CACNB4, CACNB2           |
| CG4252  | mei-41   | meiotic 41                                           | Atypical           | PIKK                | ATR                                      |
| CG42636 | Gyc76c   | Guanylyl cyclase at 76C                              | RGC                | RGC                 | NPR2, NPR1                               |
| CG4268  | Pitslre  | Pitslre                                              | CMGC               | CDK                 | CDC2L2                                   |
| CG42783 | aPKC     | atypical protein kinase C                            | AGC                | PKC                 | PRKCZ, PRKCI                             |
| CG42856 | Sik3     | Salt-inducible kinase 3                              | CAMK               | CAMKL               | SIK2, SIK3, SIK1                         |
| CG4290  | Sik2     | Salt-inducible kinase 2                              | CAMK               | CAMKL               | SIK2, SIK3, SIK1                         |
| CG43143 |          |                                                      | Unclassified       |                     |                                          |
| CG4353  | hep      | hemipterous                                          | STE                | STE7                | MAP2K7                                   |
| CG43729 |          |                                                      | Kinase-associated  |                     | STAC, STAC3, STAC2                       |
| CG43741 | Ack-like | Activated Cdc42 kinase-like                          | TK                 | Ack                 |                                          |

|        |            |                                                  |                    |                     |                                                      |
|--------|------------|--------------------------------------------------|--------------------|---------------------|------------------------------------------------------|
| CG4379 | Pka-C1     | cAMP-dependent protein kinase 1                  | AGC                | PKA                 | PRKACA, PRKACB, PRKACG, PRKX                         |
| CG4488 | wee        | wee                                              | Other              | WEE                 | WEE2, WEE1                                           |
| CG4523 | Pink1      | PTEN-induced putative kinase 1                   | Other              | NKF2                | PINK1                                                |
| CG4527 | slik       | Sterile20-like kinase                            | STE                | STE20               | STK10                                                |
| CG4546 |            |                                                  | Unclassified       |                     | MYCBP                                                |
| CG4551 | smi35A     | smell impaired 35A                               | CMGC               | DYRK                | DYRK4, DYRK1B, DYRK1A, DYRK3, DYRK2                  |
| CG4583 | Ire1       | Inositol-requiring enzyme-1                      | Other              | IRE                 | ERN2, ERN1                                           |
| CG4629 |            |                                                  | CAMK               | CAMKL               | NIM1                                                 |
| CG4720 | Pk92B      | Protein kinase at 92B                            | STE                | STE11               | MAP3K6, MAP3K5, MAP3K15                              |
| CG4798 | l(2)k01209 | lethal (2) k01209                                | Non-Protein Kinase | Nucleic Acid Kinase | UCKL1                                                |
| CG4803 | Tak12      | Tak1-like 2                                      | TKL                | MLK                 | MAP3K7                                               |
| CG4839 |            |                                                  | AGC                | PKG                 | PRKG1, PRKG2                                         |
| CG4926 | Ror        | Ror                                              | TK                 | Ror                 | MUSK, ROR1, ROR2                                     |
| CG4945 |            |                                                  | Other              | NKF1                |                                                      |
| CG5072 | Cdk4       | Cyclin-dependent kinase 4                        | CMGC               | CDK                 | CDK4, CDK6                                           |
| CG5092 | Tor        | Target of rapamycin                              | Atypical           | PIKK                | MTOR                                                 |
| CG5125 | ninaC      | neither inactivation nor afterpotential C        | STE                | STE20               |                                                      |
| CG5144 |            |                                                  | Non-Protein Kinase | Nucleic Acid Kinase | CKM, CKB, CKMT2, CKMT1B, CKMT1A                      |
| CG5169 | GckIII     | Germinal centre kinase III                       | STE                | STE20               | STK25, STK24, MST4                                   |
| CG5179 | Cdk9       | Cyclin-dependent kinase 9                        | CMGC               | CDK                 | CDK13, CDK9, CDK12                                   |
| CG5182 | Pk34A      | Pk34A                                            | CMGC               | GSK                 |                                                      |
| CG5288 |            |                                                  | Non-Protein Kinase | Carbohydrate Kinase | GALK2                                                |
| CG5310 | nmdyn-D6   | nmdyn-D6                                         | Atypical           |                     | NME6                                                 |
| CG5363 | cdc2       | cdc2                                             | CMGC               | CDK                 | CDK1, CDK2, CDK3                                     |
| CG5373 | Pi3K59F    | Phosphatidylinositol 3 kinase 59F                | CMGC               | CDK                 | PIK3C3                                               |
| CG5387 | Cdk5α      | Cdk5 activator-like protein                      | Kinase-associated  |                     | CDK5R1                                               |
| CG5408 | trbl       | tribbles                                         | CAMK               | Trbl                | TRIB2, TRIB3, TRIB1                                  |
| CG5452 | dnk        | deoxyribonucleoside kinase                       | Non-Protein Kinase | Nucleic Acid Kinase | TK2                                                  |
| CG5475 | Mpk2       | Mpk2                                             | CMGC               | MAPK                | MAPK12, MAPK13, MAPK14, MAPK11                       |
| CG5483 | Lrrk       | Leucine-rich repeat kinase                       | TKL                | LRRK                | LRRK2, LRRK1                                         |
| CG5626 |            |                                                  | Non-Protein Kinase | Nucleic Acid Kinase |                                                      |
| CG5680 | bsk        | basket                                           | CMGC               | MAPK                | MAPK10, MAPK9                                        |
| CG5725 | fbl        | fumble                                           | Non-Protein Kinase | Lipid Kinase        | PANK2, PANK1, PANK3                                  |
| CG5757 |            |                                                  | Non-Protein Kinase | Nucleic Acid Kinase | DTYMK                                                |
| CG5790 |            |                                                  | Other              | CDC7                | CDC7                                                 |
| CG5940 | CycA       | Cyclin A                                         | CMGC               | CDK                 | CCNA1, CCNA2                                         |
| CG5974 | pil        | pelle                                            | TKL                | IRAK                | IRAK2                                                |
| CG6027 | cdi        | center divider                                   | TKL                | LISK                | TESK1                                                |
| CG6092 | Dak1       | Dak1                                             | Non-Protein Kinase | Nucleic Acid Kinase | CMPK                                                 |
| CG6114 | sff        | sugar-free frosting                              | CAMK               | CAMKL               | BRSK1, BRSK2                                         |
| CG6117 | Pka-C3     | cAMP-dependent protein kinase 3                  | AGC                | PKA                 | PRKACG, PRKACA, PRKACB, PRKX                         |
| CG6214 | MRP        | Multidrug-Resistance like Protein 1              | Kinase-associated  |                     | ABCC1, ABCC2, ABCC4, ABCC3                           |
| CG6292 | CycT       | Cyclin T                                         | CMGC               | CDK                 | CCNT1, CCNT2                                         |
| CG6297 | JIL-1      | JIL-1                                            | AGC                | RSK                 | RPS6KA6, RPS6KA5, RPS6KA4, RPS6KA3, RPS6KA2, RPS6KA1 |
| CG6343 | ND42       | NADH:ubiquinone reductase 42kD subunit precursor | Kinase-associated  |                     | NDUFA10                                              |

|        |        |                                     |                    |                     |                                                                                    |
|--------|--------|-------------------------------------|--------------------|---------------------|------------------------------------------------------------------------------------|
| CG6355 | fab1   | fab2                                | PKL                |                     | PIKFYVE                                                                            |
| CG6364 |        |                                     | Other              | UK                  | UCK2, UCK1                                                                         |
| CG6386 | ball   | ballchen                            | CK1                | VRK                 | VRK3, VRK1, VRK2                                                                   |
| CG6498 |        |                                     | AGC                | MASR                | MAST1, MAST3, MAST4, MAST2                                                         |
| CG6509 |        |                                     | Kinase-associated  |                     | DLG5                                                                               |
| CG6518 | inaC   | inactivation no afterpotential C    | AGC                | PKC                 | PRKCG, PRKCB, PRKCE, PRKCQ, PRKCA, PRKCH, STAM2, STAM                              |
| CG6521 | Stam   | Signal transducing adaptor molecule | Kinase-associated  |                     |                                                                                    |
| CG6535 | tefu   | telomere fusion                     | Atypical           | PIKK                | ATM                                                                                |
| CG6551 | fu     | fused                               | Other              | ULK                 | STK36                                                                              |
| CG6612 | Adk3   | Adenylate kinase-3                  | Non-Protein Kinase | Nucleic Acid Kinase | AK4, AK2, AK3                                                                      |
| CG6620 | ial    | lplI-aurora-like kinase             | Other              | AUR                 | AURKC, AURKB, AURKA                                                                |
| CG6622 | Pkc53E | Protein C kinase 53E                | AGC                | PKC                 | PRKCG, PRKCB, PRKCE, PRKCQ, PRKCA, PRKCH, CASK, MPP4, MPP5, MPP7, MPP2, MPP1, MPP3 |
| CG6703 | CASK   | CASK ortholog                       | CAMK               | CAMKL               |                                                                                    |
| CG6715 | KP78a  | KP78a                               | CAMK               | CAMKL               | MARK2, MARK4, MARK3, MARK1                                                         |
| CG6767 |        |                                     | Non-Protein Kinase | Carbohydrate Kinase | PRPS1L1, PRPS1                                                                     |
| CG6772 | Slob   | Slowpoke binding protein            | Other              | Slob                |                                                                                    |
| CG6775 | rg     | rugose                              | Kinase-associated  |                     | NBEA, LRBA                                                                         |
| CG6800 |        |                                     | CMGC               | CDK                 | CDK7, CDK20                                                                        |
| CG6875 | asp    | abnormal spindle                    | Kinase-associated  |                     | ASPM                                                                               |
| CG6963 | gish   | gilgamesh                           | CK1                | CK1                 | CSNK1G1, CSNK1G3, CSNK1G2                                                          |
| CG7001 | Pk17E  | Protein kinase-like 17E             | AGC                | RSKR                |                                                                                    |
| CG7004 | fwd    | four wheel drive                    | PKL                |                     | PIK4B                                                                              |
| CG7028 | PRP4   | PRP4                                | CMGC               | DYRK                | PRPF4B                                                                             |
| CG7069 |        |                                     | Non-Protein Kinase | Carbohydrate Kinase | PKM2, PKLR                                                                         |
| CG7070 | PyK    | Pyruvate kinase                     | Non-Protein Kinase | Carbohydrate Kinase | PKM2, PKLR                                                                         |
| CG7094 |        |                                     | CK1                | CK1                 | CSNK1E, CSNK1A1, CSNK1A1L, CSNK1D                                                  |
| CG7097 | hppy   | happyhour                           | STE                | STE20               | MAP4K2, MAP4K3, MAP4K1, MAP4K5                                                     |
| CG7103 | Pvf1   | PDGF- and VEGF-related factor 1     | Kinase-associated  |                     | VEGFA, VEGFB, VEGFD                                                                |
| CG7125 | PKD    | Protein Kinase D                    | CAMK               | PKD                 | PRKD1, PRKD2, PRKD3                                                                |
| CG7156 |        |                                     | AGC                | RSKL                |                                                                                    |
| CG7177 | Wnk    | WNK homolog                         | Other              | WNK                 | WNK1, WNK4, WNK2, WNK3                                                             |
| CG7186 | SAK    | Sak kinase                          | Other              | PLK                 | PLK4                                                                               |
| CG7207 | cert   | ceramide transfer protein           | Kinase-associated  |                     | COL4A3BP                                                                           |
| CG7223 | htl    | heartless                           | TK                 | FGFR                | FGFR4, FGFR1, FGFR3, RET, FGFR2                                                    |
| CG7236 |        |                                     | CMGC               | CDKL                | CDKL3, CDKL5, CDKL1, CDKL2                                                         |
| CG7281 | CycC   | Cyclin C                            | CMGC               | CDK                 | CCNC                                                                               |
| CG7328 |        |                                     | Non-Protein Kinase | Carbohydrate Kinase | KHK                                                                                |
| CG7335 |        |                                     | Non-Protein Kinase | Carbohydrate Kinase | KHK                                                                                |
| CG7362 |        |                                     | Non-Protein Kinase | Carbohydrate Kinase | PKLR, PKM2                                                                         |
| CG7393 | p38b   | p38b                                | CMGC               | MAPK                | MAPK12, MAPK13, MAPK14, MAPK11                                                     |
| CG7405 | CycH   | Cyclin H                            | CMGC               | CDK                 | CCNH                                                                               |
| CG7470 |        |                                     | Unclassified       |                     | ALDH18A1                                                                           |
| CG7524 | Src64B | Src oncogene at 64B                 | TK                 | Src                 | HCK, LCK, FRK, SRC, BLK, YES1, FGR, FYN, LYN                                       |
| CG7525 | Tie    | Tie-like receptor tyrosine kinase   | TK                 |                     | TIE1                                                                               |
| CG7551 |        |                                     | Non-Protein Kinase | Carbohydrate Kinase | KHK                                                                                |

## Kinases and Associated factors

|        |                |                                                                 |                    |                     |                                               |
|--------|----------------|-----------------------------------------------------------------|--------------------|---------------------|-----------------------------------------------|
| CG7597 | Cdk12          | Cdk12                                                           | CMGC               | CDK                 | CDK13, CDK9, CDK12                            |
| CG7616 |                |                                                                 | Atypical           | ABC1                | ADCK5                                         |
| CG7643 | ald            | altered disjunction                                             | Other              | TTK                 | TTK                                           |
| CG7693 | fray           | frayed                                                          | STE                | STE20               | OXSRI                                         |
| CG7717 | Mekk1          | Mekk1                                                           | STE                | STE11               | MAP3K4                                        |
| CG7719 | gwl            | greatwall                                                       | AGC                | MAST                | MASTL                                         |
| CG7766 |                |                                                                 | Kinase-associated  |                     | PHKA1, PHKA2                                  |
| CG7838 | BubR1          | Bub1-related kinase                                             | Other              | BUB                 | BUB1B                                         |
| CG7873 | Src42A         | Src oncogene at 42A                                             | TK                 | Src                 | HCK, LCK, FRK, SRC, BLK, YES1, FGR, FYN, LYN  |
| CG7892 | nmo            | nemo                                                            | CMGC               | MAPK                | NLK                                           |
| CG7904 | put            | punt                                                            | TKL                | STKR                | BMPR2, ACVR2A, TGFB2, ACVR2B                  |
| CG7995 |                |                                                                 | Non-Protein Kinase | Lipid Kinase        | GK, GK2                                       |
| CG8049 | Btk29A         | Btk family kinase at 29A                                        | TK                 | Tec                 | TEC, ITK, TXK, BMX, BTK                       |
| CG8057 | alc            | alicorn                                                         | Non-Protein Kinase | Nucleic Acid Kinase | PRKAB2, PRKAB1                                |
| CG8094 | Hex-C          | Hexokinase C                                                    | Non-Protein Kinase | Carbohydrate Kinase | HK3, HK2, HKDC1, HK1                          |
| CG8173 |                |                                                                 | Other              | TOPK                | PBK                                           |
| CG8174 | SRPK           | SRPK                                                            | CMGC               | SRPK                | SRPK1, SRPK3, SRPK2                           |
| CG8201 | par-1          | par-1                                                           | CAMK               | CAMKL               | MARK2, MARK4, MARK3, MARK1                    |
| CG8203 | Cdk5           | Cyclin-dependent kinase 5                                       | CMGC               | CDK                 | CDK5                                          |
| CG8222 | Pvr            | PDGF- and VEGF-receptor related                                 | TK                 | VEGFR               | VEGFR3, VEGFR2, VEGFR1                        |
| CG8224 | babo           | baboon                                                          | TKL                | STKR                | ACVR1, BMPR1A, ACVR1C, ACVR1B, BMPR1B, ACVRL1 |
| CG8239 |                |                                                                 | Non-Protein Kinase | Carbohydrate Kinase | MVD                                           |
| CG8250 | Alk            | Alk                                                             | TK                 | ALK                 | ALK, LTK, ROS1                                |
| CG8286 | P58IPK         | P58IPK                                                          | Kinase-associated  |                     | DNAJC3, DNAJC7                                |
| CG8298 |                |                                                                 | Non-Protein Kinase | Lipid Kinase        | GK, GK2                                       |
| CG8351 | Tcp-1 $\eta$   | Tcp-1 $\eta$                                                    | Kinase-associated  |                     | CCT7                                          |
| CG8362 | nmdyn-D7       | nmdyn-D7                                                        | Atypical           |                     | NME7                                          |
| CG8363 | Papss          | PAPS synthetase                                                 | Non-Protein Kinase | Nucleic Acid Kinase | PAPSS1, PAPSS2                                |
| CG8475 |                |                                                                 | CAMK               |                     | PHKB                                          |
| CG8485 |                |                                                                 | CAMK               | CAMKL               | SNRK                                          |
| CG8565 |                |                                                                 | CMGC               | SRPK                | SRPK1, SRPK3, SRPK2                           |
| CG8637 | trc            | tricornered                                                     | AGC                | NDR                 | STK38                                         |
| CG8657 | Dgke           | Diacyl glycerol kinase $\epsilon$                               | Non-Protein Kinase | Lipid Kinase        | DGKE                                          |
| CG8726 |                |                                                                 | Other              | Slob                | PXK                                           |
| CG8767 | mos            | mos                                                             | Other              | MOS                 | MOS                                           |
| CG8789 | wnd            | wallenda                                                        | TKL                | MLK                 | MAP3K12, MAP3K13                              |
| CG8808 | Pdk            | Pyruvate dehydrogenase kinase                                   | Atypical           | PDHK                | PDK4, PDK3, PDK1, PDK2                        |
| CG8866 |                |                                                                 | Other              | ULK                 | ULK3                                          |
| CG8874 | Fps85D         | Fps oncogene analog                                             | TK                 | Fer                 | FER                                           |
| CG8878 |                |                                                                 | CK1                | VRK                 |                                               |
| CG8914 | CK11 $\beta$ 2 | Casein kinase II $\beta$ 2 subunit                              | CMGC               |                     | CSNK2B                                        |
| CG8948 | Graf           | GTPase regulator associated with focal adhesion kinase ortholog | Kinase-associated  |                     | OPHN1, ARHGAP42, ARHGAP10, ARHGAP26           |
| CG8967 | otk            | off-track                                                       | TK                 | CCK4                | PTK7                                          |
| CG9096 | CycD           | Cyclin D                                                        | CMGC               | CDK                 | CCND1, CCND2, CCND3                           |
| CG9222 |                |                                                                 | CAMK               | TSSK                | TSSK6, TSSK2, TSSK4, TSSK3,                   |

Kinases and Associated factors

| CG9222 |       |                             | CAMK               | ISSR                | TSSK1                              |
|--------|-------|-----------------------------|--------------------|---------------------|------------------------------------|
| CG9326 | vari  | varicose                    | Non-Protein Kinase | Nucleic Acid Kinase | MPP4, MPP5, MPP7, MPP2, MPP1, MPP3 |
| CG9358 | Phk-3 | Pherokine 3                 | Non-Protein Kinase | Lipid Kinase        |                                    |
| CG9374 | lkb1  | lkb1                        | CAMK               | CAMKL               | STK11                              |
| CG9541 |       |                             | Non-Protein Kinase | Nucleic Acid Kinase |                                    |
| CG9738 | Mkk4  | MAP kinase kinase 4         | STE                | STE7                | MAP2K4, MAP2K6, MAP2K3             |
| CG9746 | ird1  | immune response deficient 1 | Other              | VPS15               | PIK3R4                             |
| CG9774 | rok   | Rho-kinase                  | AGC                | DMPK                | ROCK1, ROCK2                       |
| CG9961 |       |                             | Non-Protein Kinase | Lipid Kinase        | PGK1, PGK2                         |
| CG9962 |       |                             | CK1                | CK1                 |                                    |
| CG9985 | sktl  | skittles                    | PKL                |                     | PIP5K1A, PIP5K1B, PSMD4, PIP5K1C   |

Fig S2

## Classifications of phosphatases and associated factors

|                                                              |
|--------------------------------------------------------------|
| Phosphoprotein Phosphatase                                   |
| Protein Phosphatase                                          |
| Mg <sup>+</sup> /Mn <sup>+</sup> -dependent                  |
| Classical Protein Tyrosine Phosphatase                       |
| Class I/Dual Specificity Phosphatase                         |
| Class III Protein Tyrosine Phosphatase                       |
| Factor IIF-interacting CTD Phosphatase/Small CTD Phosphatase |
| Haloacid Dehalogenase-like Hydrolase                         |
| Unclassified                                                 |
| Phosphatase-associated                                       |
| Non-protein Phosphatase                                      |

Co-factors such as subunits of multi-component PPTases  
Such as lipid and sugar phosphatases

| Drosophila Phosphatase |             |                                                   | Gene Group              | Gene Family            | Human ortholog(s)            |
|------------------------|-------------|---------------------------------------------------|-------------------------|------------------------|------------------------------|
| Annotation Symbol      | Gene Symbol | Gene Name                                         |                         |                        |                              |
| CG10089                |             |                                                   | PTP                     | Class I/DSP            | DUSP22, DUSP15               |
| CG10138                | PpD5        | Protein phosphatase D5                            | STP                     | PPP                    | PPP1CC, PPP1CA               |
| CG10371                | Plip        | PTEN-like phosphatase                             | PTP                     | Classical              | PTPMT1                       |
| CG10376                |             |                                                   | STP                     | PPM                    | PPM1F, PPM1E                 |
| CG10417                |             |                                                   | STP                     | PPM                    | PPM1G                        |
| CG10426                |             |                                                   | Non-Protein Phosphatase | Lipid Phosphatase      | INPP5E                       |
| CG10443                | Lar         | Leukocyte-antigen-related-like                    | PTP                     | Classical              | PTPRS, PTPRD, PTPRF          |
| CG10493                | Phlpp       | PH domain leucine-rich repeat protein phosphatase | STP                     | PPM                    | PHLPP1, PHLPP2               |
| CG10574                | I-2         | Inhibitor-2                                       |                         | Phosphatase-associated | PPP1R2                       |
| CG10592                |             |                                                   |                         | Unclassified           | ALPL, ALPPL2, ALPP           |
| CG10827                |             |                                                   |                         | Unclassified           | ALPL, ALPPL2, ALPP           |
| CG10930                | PpY-55A     | Protein phosphatase Y at 55A                      | STP                     | PPP                    |                              |
| CG10975                | Ptp69D      | Protein tyrosine phosphatase 69D                  | PTP                     | Classical              | PTPRG, PTPRZ1                |
| CG11217                | CanB2       | Calcineurin B2                                    | STP                     | PPP                    | PPP3R1, WDR92, PPP3R2        |
| CG11425                |             |                                                   | Non-Protein Phosphatase | Lipid Phosphatase      | PPAP2C, PPAP2B, PPAP2A       |
| CG11426                |             |                                                   | Non-Protein Phosphatase | Lipid Phosphatase      | PPAP2C, PPAP2B, PPAP2A       |
| CG11437                |             |                                                   | Non-Protein Phosphatase | Lipid Phosphatase      | PPAP2C, PPAP2B, PPAP2A       |
| CG11438                |             |                                                   | Non-Protein Phosphatase | Lipid Phosphatase      | PPAP2C, PPAP2B, PPAP2A       |
| CG11440                | laza        | lazarro                                           | Non-Protein Phosphatase | Lipid Phosphatase      | PPAP2C, PPAP2B, PPAP2A       |
| CG11516                | Ptp99A      | Protein tyrosine phosphatase 99A                  | PTP                     | Classical              | PTPRG, PTPRZ1                |
| CG11597                |             |                                                   | STP                     | PPP                    |                              |
| CG11883                |             |                                                   |                         | Phosphatase-associated |                              |
| CG12034                |             |                                                   |                         | Phosphatase-associated | SMPD2                        |
| CG12078                |             |                                                   | Asp-based catalysis     | HAD                    |                              |
| CG12091                |             |                                                   | STP                     | PPM                    | PPTC7                        |
| CG12151                | Pdp         | Pyruvate dehydrogenase phosphatase                | STP                     | PPM                    | PDP1, PDP2                   |
| CG12169                | Ppm1        | Ppm1                                              | STP                     | PPM                    |                              |
| CG12173                |             |                                                   | Asp-based catalysis     | HAD                    | ENOPH1                       |
| CG12217                | PpV         | Protein phosphatase V                             | STP                     | PPP                    | PPP4C, PPP6C, PPP2CA, PPP2CB |
| CG12252                | Fcp1        |                                                   | Asp-based catalysis     | FCP/SCP                | CTDP1                        |
| CG1228                 | Ptpmeg      | Ptpmeg                                            | PTP                     | Classical              | PTPN3, PTPN4                 |

|         |           |                                                |                         |                          |                                        |
|---------|-----------|------------------------------------------------|-------------------------|--------------------------|----------------------------------------|
| CG12538 |           |                                                | Non-Protein Phosphatase | Nucleic Acid Phosphatase |                                        |
| CG12746 |           |                                                | Non-Protein Phosphatase | Lipid Phosphatase        | PPAPDC1A, PPAPDC1B                     |
| CG13125 | TbCMF46   | TbCMF47                                        |                         | Phosphatase-associated   | LRRC48                                 |
| CG13197 |           |                                                | PTP                     | Class I/DSP              | DUSP11                                 |
| CG13311 |           |                                                |                         | Phosphatase-associated   |                                        |
| CG13570 | spag      | spaghetti                                      |                         | Phosphatase-associated   |                                        |
| CG1395  | stg       | string                                         | PTP                     | Class I/DSP              | CDC25A, CDC25B                         |
| CG14022 |           |                                                | Non-Protein Phosphatase | Lipid Phosphatase        | ACYP1, ACYP2                           |
| CG14080 | Mkp3      | Mitogen-activated protein kinase phosphatase 3 | PTP                     | Class I/DSP              | DUSP7, DUSP6, DUSP9                    |
| CG14211 | MKP-4     | MAPK Phosphatase 4                             | PTP                     | Class I/DSP              | DUSP12                                 |
| CG14297 |           |                                                | PTP                     | Class III                | ACP1                                   |
| CG14411 |           |                                                | PTP                     | Class I/DSP              | MTMR11, MTMR10, MTMR12                 |
| CG1455  | CanA1     | Calcineurin A1                                 | STP                     | PPP                      | PPP3CB, PPP3CC                         |
| CG14616 | I(1)G0196 | lethal (1) G0196                               | Non-Protein Phosphatase | Lipid Phosphatase        | PPIP5K2, PPIP5K1                       |
| CG1462  | Aph-4     | Alkaline phosphatase 4                         |                         | Unclassified             | ALPL, ALPPL2, ALPP                     |
| CG14719 | I-t       | inhibitor-t                                    |                         | Phosphatase-associated   |                                        |
| CG14903 |           |                                                | PTP                     | Class III                | PTRHD1                                 |
| CG15035 |           |                                                | STP                     | PPM                      | PPTC7                                  |
| CG15385 |           |                                                | Non-Protein Phosphatase | Nucleic Acid Phosphatase | ACPL2                                  |
| CG15400 |           |                                                | Non-Protein Phosphatase | Carbohydrate Phosphatase | G6PC                                   |
| CG15528 |           |                                                | PTP                     | Class I/DSP              | DUSP14, DUSP21                         |
| CG15533 |           |                                                |                         | Phosphatase-associated   | SMPD1                                  |
| CG15534 |           |                                                |                         | Phosphatase-associated   | SMPD1                                  |
| CG15743 |           |                                                | Non-Protein Phosphatase | Lipid Phosphatase        | IMPAD1                                 |
| CG1637  |           |                                                | Non-Protein Phosphatase | Nucleic Acid Phosphatase | PAPL                                   |
| CG16717 |           |                                                |                         | Phosphatase-associated   | MPPED2, MPPED1                         |
| CG16757 | Spn       | Spinophilin                                    |                         | Phosphatase-associated   |                                        |
| CG16771 |           |                                                |                         | Unclassified             | ALPL, ALPPL2, ALPP                     |
| CG16870 | Acyp      | Acylphosphatase                                | Non-Protein Phosphatase | Lipid Phosphatase        | ACYP1, ACYP2                           |
| CG16928 | mre11     | meiotic recombination 11                       |                         | Phosphatase-associated   | MRE11A                                 |
| CG1696  | Dd        | Dullard                                        | Asp-based catalysis     | FCP/SCP                  | CTDNEP1                                |
| CG17026 |           |                                                | Non-Protein Phosphatase | Lipid Phosphatase        | IMPA1, IMPA2                           |
| CG17027 |           |                                                | Non-Protein Phosphatase | Lipid Phosphatase        | IMPA1, IMPA2                           |
| CG17028 |           |                                                | Non-Protein Phosphatase | Lipid Phosphatase        | IMPA1, IMPA2                           |
| CG17029 |           |                                                | Non-Protein Phosphatase | Lipid Phosphatase        | IMPA1, IMPA2                           |
| CG17124 |           |                                                |                         | Phosphatase-associated   | PPP1R14C, PPP1R14B, PPP1R14D, PPP1R14A |
| CG17291 | Pp2A-29B  | Protein phosphatase 2A at 29B                  | STP                     | PPP                      | PPP2R1B, PPP2R1A                       |
| CG17598 |           |                                                | STP                     | PPM                      | PPM1M, PPM1J, PPM1H                    |
| CG17746 |           |                                                | STP                     | PPM                      |                                        |
| CG1809  |           |                                                |                         | Unclassified             | ALPL, ALPPL2, ALPP                     |
| CG1810  | mRNA-cap  | mRNA-capping enzyme                            | PTP                     | Class I/DSP              | RNGTT                                  |
| CG1817  | Ptp10D    | Protein tyrosine phosphatase 10D               | PTP                     | Classical                | PTPRB, PTPRJ, PTPRO                    |
| CG18243 | Ptp52F    | Ptp52F                                         | PTP                     | Classical                |                                        |
| CG1906  | alph      | alphabet                                       | STP                     | PPM                      | PPM1A, PPM1B                           |



|         |           |                                                    |                         |                          |                              |
|---------|-----------|----------------------------------------------------|-------------------------|--------------------------|------------------------------|
| CG2096  | flw       | flapwing                                           | STP                     | PPP                      | PPP1CB, PPP1CA, PPP1CC       |
| CG2104  |           |                                                    | PTP                     | Unclassified             | PPP2R4                       |
| CG2890  | PPP4R2r   | Protein phosphatase 4 regulatory subunit 2-related | STP                     | PPP                      | PPP4R2                       |
| CG2984  | Pp2C1     | Protein phosphatase 2C                             | STP                     | PPM                      | PP2CM                        |
| CG30103 |           |                                                    |                         | Phosphatase-associated   | NT5E                         |
| CG30104 |           |                                                    |                         | Phosphatase-associated   | NT5E                         |
| CG3028  | lpp       | Inositol polyphosphate 1-phosphatase               | Non-Protein Phosphatase | Lipid Phosphatase        | INPP1                        |
| CG3059  | NTPase    | NTPase                                             | Non-Protein Phosphatase | Nucleic Acid Phosphatase | ENTPD6, ENTPD5               |
| CG31137 | twin      | twin                                               |                         | Phosphatase-associated   | CNOT6L, CNOT6                |
| CG31299 | cu        | curled                                             |                         | Phosphatase-associated   | CCRN4L                       |
| CG31469 |           |                                                    | PTP                     | Class III                | ACP1                         |
| CG31692 | fbp       | fructose-1,6-bisphosphatase                        | Non-Protein Phosphatase | Carbohydrate Phosphatase | FBP2, FBP1                   |
| CG31717 |           |                                                    | Non-Protein Phosphatase | Lipid Phosphatase        | PPAPDC3, PPAPDC2             |
| CG31759 |           |                                                    |                         | Phosphatase-associated   | PDE12                        |
| CG3178  | Rrp1      | Recombination repair protein 1                     |                         | Phosphatase-associated   | APEX1                        |
| CG31795 | IA-2      | IA-2 ortholog                                      | PTP                     | Classical                | PTPRN2, PTPRN                |
| CG32156 | Mbs       | Myosin binding subunit                             | STP                     | PPP                      | PPP1R12A, PPP1R12B           |
| CG3245  | PpN-58A   | Protein phosphatase N at 58A                       | STP                     | PPP                      |                              |
| CG32487 |           |                                                    | Asp-based catalysis     | HAD                      | PDXP, PGP                    |
| CG32488 |           |                                                    | Asp-based catalysis     | HAD                      | PDXP, PGP                    |
| CG32505 | Pp4-19C   | Protein phosphatase 19C                            | STP                     | PPP                      | PPP4C, PPP6C, PPP2CA, PPP2CB |
| CG32568 |           |                                                    | STP                     | PPP                      |                              |
| CG3264  |           |                                                    |                         | Unclassified             | ALPL, ALPPL2, ALPP           |
| CG32697 | I(1)G0232 | lethal (1) G0232                                   | PTP                     | Classical                | PTPN9                        |
| CG32812 |           |                                                    | STP                     | PPP                      |                              |
| CG3289  | Ptpa      | Phosphotyrosyl phosphatase activator               | PTP                     | Unclassified             | PPP2R4                       |
| CG3290  |           |                                                    |                         | Unclassified             | ALPL, ALPPL2, ALPP           |
| CG3292  |           |                                                    |                         | Unclassified             | ALPL, ALPPL2, ALPP           |
| CG33747 | primo-2   | primo-2                                            | PTP                     | Class III                | ACP2                         |
| CG33748 | primo-1   | primo-1                                            | PTP                     | Class III                | ACP1                         |
| CG3376  |           |                                                    |                         | Phosphatase-associated   | SMPD1                        |
| CG34099 | Mkp       | MAP kinase-specific phosphatase                    | PTP                     | Class I/DSP              | DUSP19                       |
| CG34140 |           |                                                    |                         | Phosphatase-associated   | PUSL1                        |
| CG3530  |           |                                                    | PTP                     | Class I/DSP              | MTMR6, MTMR7, MTMR8          |
| CG3573  | Ocrl      | Oculocerebrorenal syndrome of Lowe ortholog        | Non-Protein Phosphatase | Lipid Phosphatase        | INPP5B, OCRL                 |
| CG3632  |           |                                                    | PTP                     | Class I/DSP              | MTMR3, MTMR4                 |
| CG3705  | aay       | astray                                             | Asp-based catalysis     | HAD                      | PSPH                         |
| CG3954  | csw       | corkscrew                                          | PTP                     | Classical                | PTPN11, PTPN6                |
| CG3980  | Cep97     |                                                    |                         | Phosphatase-associated   | CEP97                        |
| CG40448 | Pp1-Y2    | Pp1-Y2                                             | STP                     | PPP                      | PPP1CB, PPP1CA, PPP1CC       |
| CG4123  | Mipp1     | Multiple inositol polyphosphate phosphatase 1      | Non-Protein Phosphatase | Lipid Phosphatase        |                              |
| CG41534 | Pp1-Y1    | Pp1-Y1                                             | STP                     | PPP                      | PPP1CB, PPP1CA, PPP1CC       |

|         |                   |                                               |                         |                          |                                    |
|---------|-------------------|-----------------------------------------------|-------------------------|--------------------------|------------------------------------|
| CG4209  | CanB              | Calcineurin B                                 | STP                     | PPP                      | PPP3R1, WDR92, PPP3R2              |
| CG42249 |                   |                                               |                         | Phosphatase-associated   | NT5E                               |
| CG42271 |                   |                                               | Non-Protein Phosphatase | Lipid Phosphatase        | INPP4A, INPP4B                     |
| CG42283 | 5Ptasel           | 5Ptasel                                       | Non-Protein Phosphatase | Lipid Phosphatase        | INPP5A                             |
| CG42327 |                   |                                               | PTP                     | Classical                |                                    |
| CG4317  | Mipp2             | Multiple inositol polyphosphate phosphatase 2 | Non-Protein Phosphatase | Lipid Phosphatase        |                                    |
| CG4733  | PR72              | PR72                                          | STP                     | PPP                      | PPP2R3A, PPP2R3B                   |
| CG4827  | veil              | veil                                          |                         | Phosphatase-associated   | NT5E                               |
| CG4965  | twe               | twine                                         | PTP                     | Class I/DSP              |                                    |
| CG4993  | PRL-1             | PRL-2                                         | PTP                     | Class I/DSP              | PTP4A1, PTP4A2, PTP4A3             |
| CG5026  |                   |                                               | PTP                     | Class I/DSP              | MTMR9                              |
| CG5150  |                   |                                               |                         | Unclassified             | ALPL, ALPPL2, ALPP                 |
| CG5171  |                   |                                               | Non-Protein Phosphatase | Carbohydrate Phosphatase |                                    |
| CG5177  |                   |                                               | Non-Protein Phosphatase | Carbohydrate Phosphatase |                                    |
| CG5276  |                   |                                               | Non-Protein Phosphatase | Nucleic Acid Phosphatase | CANT1                              |
| CG5361  |                   |                                               |                         | Unclassified             |                                    |
| CG5567  |                   |                                               | Asp-based catalysis     | HAD                      | PDXP, PGP                          |
| CG5577  |                   |                                               | Asp-based catalysis     | HAD                      | PDXP, PGP                          |
| CG5643  | wdb               | widerborst                                    | STP                     | PPP                      | PPP2R5D, PPP2R5E, PPP2R5C, PPP2R5A |
| CG5650  | Pp1-87B           | Protein phosphatase 1 at 87B                  | STP                     | PPP                      | PPP1CB, PPP1CA, PPP1CC             |
| CG5656  |                   |                                               |                         | Unclassified             | ALPL, ALPPL2, ALPP                 |
| CG5671  | Pten              | Pten                                          | PTP                     | Class I/DSP              | PTEN, TPTE, TPTE2                  |
| CG5784  | Mapmodulin        | Mapmodulin                                    |                         | Phosphatase-associated   | ANP32E, ANP32D, ANP32A, ANP32B     |
| CG5820  | Gp150             |                                               |                         | Phosphatase-associated   |                                    |
| CG5830  |                   |                                               | Asp-based catalysis     | FCP/SCP                  | CTDSPL, CTDSP2, CTDSP1             |
| CG5851  | sds22             | sds22                                         | STP                     | PPP                      | PPP1R7                             |
| CG6036  |                   |                                               | STP                     | PPM                      | PPM1A, PPM1B                       |
| CG6235  | tws               | twins                                         | STP                     | PPP                      | PPP2R2C, PPP2R2B, PPP2R2D, PPP2R2A |
| CG6238  | ssh               | slingshot                                     | PTP                     | Class I/DSP              | SSH2, SSH3, SSH1                   |
| CG6380  |                   |                                               | STP                     | PPP                      | PPP1R2                             |
| CG6542  | EDTP              | Egg-derived tyrosine phosphatase              | PTP                     | Class I/DSP              | MTMR14                             |
| CG6562  | synj              | synaptojanin                                  | Non-Protein Phosphatase | Lipid Phosphatase        | SYNJ2, SYNJ1                       |
| CG6571  | rdgC              | retinal degeneration C                        | STP                     | PPP                      | PPEF1, PPEF2                       |
| CG6593  | Pp1 $\alpha$ -96A | Protein phosphatase 1 $\alpha$ at 96A         | STP                     | PPP                      | PPP1CB, PPP1CA, PPP1CC             |
| CG6656  |                   |                                               | Non-Protein Phosphatase | Nucleic Acid Phosphatase | ACPP, ACP2, ACPT                   |
| CG6746  |                   |                                               | PTP                     | Unclassified             | PTPLA, PTPLB                       |
| CG6805  |                   |                                               | Non-Protein Phosphatase | Lipid Phosphatase        | INPP5J, INPP5K                     |
| CG6896  | MYPT-75D          | MYPT-75D                                      | STP                     | PPP                      | PPP1R16B, PPP1R16A                 |
| CG6899  | Ptp4E             | Protein tyrosine phosphatase 4E               | PTP                     | Classical                | PTPRB, PTPRJ, PTPRO                |
| CG6939  | Sbf               | SET domain binding factor                     | PTP                     | Class I/DSP              | SBF2, SBF1                         |

|        |         |                                                      |                         |                          |                                      |
|--------|---------|------------------------------------------------------|-------------------------|--------------------------|--------------------------------------|
| CG7067 | NitFhit | Nitrilase and fragile histidine triad fusion protein | Non-Protein Phosphatase | Nucleic Acid Phosphatase | NIT1, NIT2, FHIT                     |
| CG7109 | mts     | microtubule star                                     | STP                     | PPP                      | PPP4C, PPP6C, PPP2CA, PPP2CB         |
| CG7115 |         |                                                      | STP                     | PPM                      | PPM1L                                |
| CG7134 | cdc14   | cdc14                                                | PTP                     | Class I/DSP              | CDC14B, CDC14A                       |
| CG7180 |         |                                                      | PTP                     | Classical                | PTPRK                                |
| CG7378 |         |                                                      | PTP                     | Class I/DSP              | DUSP3, DUSP26, DUSP13, DUSP1, DUSP27 |
| CG7615 | fig     | fos intronic gene                                    | STP                     | PPM                      | PPTC7                                |
| CG7789 |         |                                                      | PTP                     | Class I/DSP              | BPNT1                                |
| CG7850 | puc     | puckered                                             | PTP                     | Class I/DSP              | DUSP10                               |
| CG7899 | Acph-1  | Acid phosphatase 1                                   | Non-Protein Phosphatase | Nucleic Acid Phosphatase | ACPP, ACP2, ACPT                     |
| CG7913 | Pp2A-B' | Pp2A-B'                                              | STP                     | PPP                      | PPP2R5D, PPP2R5E, PPP2R5C, PPP2R5A   |
| CG7942 | ldbr    | ariat debranching enzyme                             |                         | Phosphatase-associated   | DBR1                                 |
| CG8105 |         |                                                      |                         | Unclassified             | ALPL, ALPLL2, ALPP                   |
| CG8147 |         |                                                      |                         | Unclassified             | ALPL, ALPLL2, ALPP                   |
| CG8402 | PpD3    | Protein phosphatase D3                               | STP                     | PPP                      | PPP5C                                |
| CG8455 |         |                                                      | Non-Protein Phosphatase | Lipid Phosphatase        | MPPE1                                |
| CG8509 |         |                                                      | PTP                     | Unclassified             | PPP2R4                               |
| CG8584 |         |                                                      | Asp-based catalysis     | FCP/SCP                  |                                      |
| CG8804 | wun     | wunen                                                | Non-Protein Phosphatase | Lipid Phosphatase        | PPAP2C, PPAP2B, PPAP2A               |
| CG8805 | wun2    | wunen-2                                              | Non-Protein Phosphatase | Lipid Phosphatase        | PPAP2C, PPAP2B, PPAP2A               |
| CG8822 | PpD6    | Protein phosphatase D6                               | STP                     | PPP                      | PPP1CC, PPP1CA                       |
| CG8889 | Mppe    | Metallophosphoesterase                               | Non-Protein Phosphatase | Lipid Phosphatase        | MPPE1                                |
| CG8980 | NiPp1   | Nuclear inhibitor of Protein phosphatase 1           |                         | Phosphatase-associated   | PPP1R8                               |
| CG9115 | mtm     | myotubularin                                         | PTP                     | Class I/DSP              | MTMR1, MTM1, MTMR2                   |
| CG9128 | Sac1    | Sac1                                                 | Non-Protein Phosphatase | Lipid Phosphatase        | SACM1L                               |
| CG9151 | acj6    | abnormal chemosensory jump 6                         |                         | Phosphatase-associated   | POU4F2, POU4F3                       |
| CG9156 | Pp1-13C | Protein phosphatase 1 at 13C                         | STP                     | PPP                      | PPP1CB, PPP1CA, PPP1CC               |
| CG9181 | Ptp61F  | Protein tyrosine phosphatase 61F                     | PTP                     | Classical                | PTN2, PTPN1                          |
| CG9236 | Cib2    | CIB2 ortholog                                        |                         | Phosphatase-associated   | CIB1, CIB4, CIB2                     |
| CG9238 |         |                                                      | STP                     | PPP                      | PPP1R3C                              |
| CG9267 |         |                                                      | PTP                     | Classical                | PTPLAD1, PTPLAD2                     |
| CG9311 | mop     | myopic                                               | PTP                     | Classical                | PTPN23                               |
| CG9351 | fifi    | falafel                                              | STP                     | PPP                      | SMEK2, SMEK1                         |
| CG9389 |         |                                                      | Non-Protein Phosphatase | Lipid Phosphatase        | IMPA1, IMPA1                         |
| CG9391 |         |                                                      | Non-Protein Phosphatase | Lipid Phosphatase        | IMPA1, IMPA2                         |
| CG9449 |         |                                                      | Non-Protein Phosphatase | Nucleic Acid Phosphatase | ACPP, ACP2, ACPT                     |
| CG9451 |         |                                                      | Non-Protein Phosphatase | Nucleic Acid Phosphatase | ACPP, ACP2, ACPT                     |
| CG9452 |         |                                                      | Non-Protein Phosphatase | Nucleic Acid Phosphatase | ACPP, ACP2, ACPT                     |
| CG9493 | Pez     | Pez                                                  | PTP                     | Classical                | PTPN14                               |

|        |          |                                                   |                         |                          |                           |
|--------|----------|---------------------------------------------------|-------------------------|--------------------------|---------------------------|
| CG9554 | eya      | eyes absent                                       | Asp-based catalysis     | HAD                      | EYA1, EYA4, EYA3, EYA2    |
| CG9601 |          |                                                   | Non-Protein Phosphatase | Nucleic Acid Phosphatase | PNKP                      |
| CG9619 | Gbs-76A  | Glycogen binding subunit 76A                      | STP                     | PPP                      | PPP1R3A, PPP1R3C, PPP1R3B |
| CG9764 | yrt      | yurt                                              |                         | Phosphatase-associated   | EPB41L4B, EPB41L5         |
| CG9784 |          |                                                   | Non-Protein Phosphatase | Lipid Phosphatase        |                           |
| CG9801 |          |                                                   | STP                     | PPM                      |                           |
| CG9819 | CanA-14F | Calcineurin A at 14F                              | STP                     | PPP                      |                           |
| CG9842 | Pp2B-14D | Protein phosphatase 2B at 14D                     | STP                     | PPP                      | PPP3CB, PPP3CC            |
| CG9856 | PTP-ER   | Protein tyrosine phosphatase-ERK/Enhancer of Ras1 | PTP                     | Class I/DSP              |                           |

Fig. S3

| Drosophila Gene   |             |                                                       | PILOT SCREEN |                    |      |     |            |                  |      |     |
|-------------------|-------------|-------------------------------------------------------|--------------|--------------------|------|-----|------------|------------------|------|-----|
| Annotation Symbol | Gene Symbol | Gene Name                                             | RNAi Stock   | UAS-dcr2::dpp-Gal4 |      |     | RNAi Stock | UAS-dcr2;hh-Gal4 |      |     |
|                   |             |                                                       |              | Wing disc          |      |     |            | Wing disc        |      |     |
|                   |             |                                                       |              | Wg                 | Sens | Dll |            | Wg               | Sens | Dll |
| CG4889            | wg          | wingless                                              | 13352        |                    |      |     | 104579     |                  |      |     |
| CG6205            | por         | porcupine                                             | 47864        |                    |      |     | 100780     |                  |      |     |
| CG6210            | wls         | wntless                                               | 103812       |                    |      |     | 5215       |                  |      |     |
| CG5912            | arr         | arrow                                                 | 36286        |                    |      |     | 6708       |                  |      |     |
| CG11579           | arm         | armadillo                                             | 107344       |                    |      |     | 7767       |                  |      |     |
| CG7926            | Axn         | Axin                                                  | 7748         |                    |      |     |            |                  |      |     |
| CG6193            | Apc2        | Adenomatous polyposis coli tumor suppressor homolog 2 | 22290        |                    |      |     | 100104     |                  |      |     |
| CG34403           | pan         | pangolin                                              | 108679       |                    |      |     | 25940      |                  |      |     |

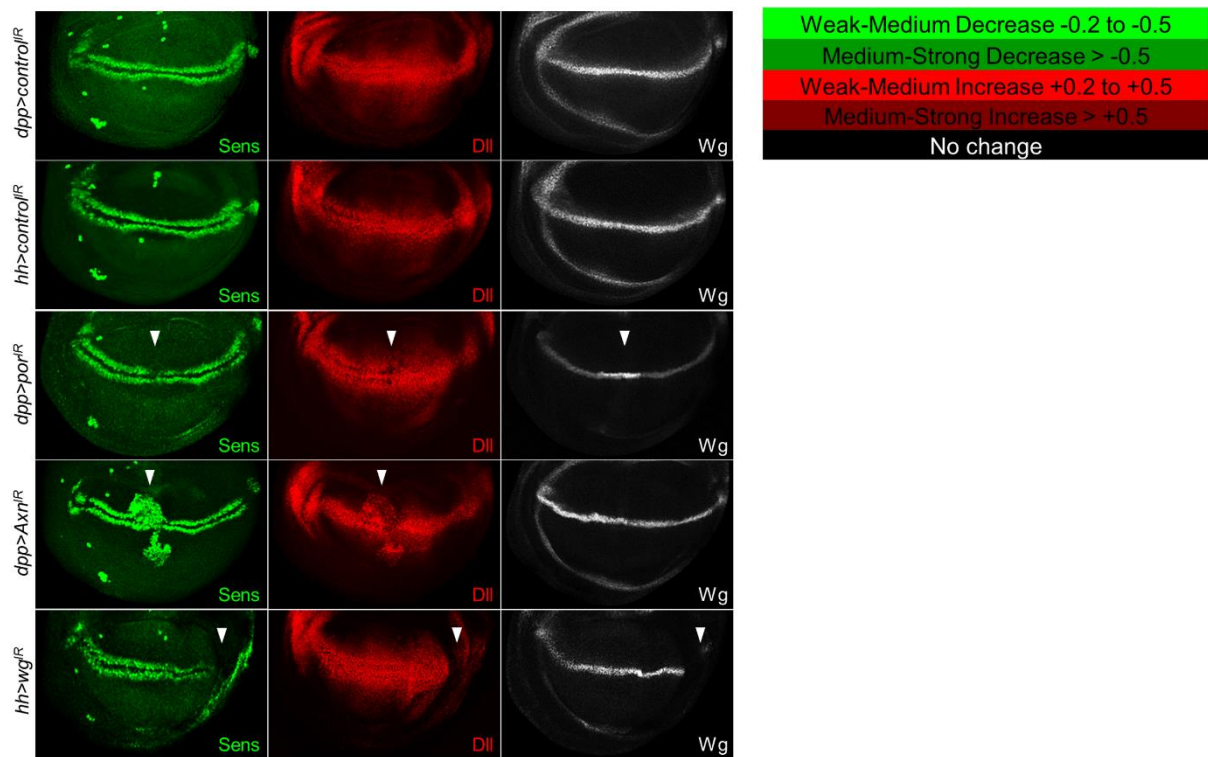

Fig. S4

**Kinase Data**

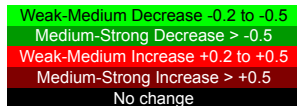

Wing phenotype any visible wing phenotype including notches, blisters, vein spacing, altered size  
 Lethal No adults recovered

| Kinase Gene       |             | PRIMARY SCREEN  |                    |                |       |            |                  | SECONDARY SCREEN |       |            |                  |      |       | HEDGEHOG SCREEN                         |            |                       |     |       |
|-------------------|-------------|-----------------|--------------------|----------------|-------|------------|------------------|------------------|-------|------------|------------------|------|-------|-----------------------------------------|------------|-----------------------|-----|-------|
| Annotation Symbol | Gene Symbol | RNAi Stock      | UAS-dcr2;;dpp-Gal4 |                |       | RNAi Stock | UAS-dcr2;hh-Gal4 |                  |       | RNAi Stock | UAS-dcr2;C5-Gal4 |      |       | UAS-dcr2; dpp-Gal4 or UAS-dcr2; hh-Gal4 | RNAi Stock | MS1096-Gal4;UAS-dcr2  |     |       |
|                   |             |                 | Wing disc          |                | Adult |            | Wing disc        |                  | Adult |            | Wing disc        |      | Adult | Wing disc                               |            | Wing disc             |     | Adult |
|                   |             |                 | Wg                 | Sens           | Dll   |            | Wg               | Sens             | Dll   |            | Wg               | Sens | Dll   | Cut                                     |            | Ci                    | Ptc |       |
| CG10023           | Fak56D      | 17957<br>108608 |                    |                |       |            |                  |                  |       |            |                  |      |       |                                         |            |                       |     |       |
| CG10033           | for         | 38320           | Wing phenotype     |                |       |            |                  |                  |       | 38320      | Wing phenotype   |      |       |                                         | 38320      | Wing phenotype        |     |       |
|                   |             | 108293          |                    |                |       |            |                  |                  |       |            |                  |      |       |                                         | 108293     | Wing phenotype        |     |       |
|                   |             | 10033R-2        | Wing phenotype     |                |       | 10033R-1   | Lethal           |                  |       |            |                  |      |       |                                         | 10033R-1   | Lethal                |     |       |
|                   |             |                 |                    |                |       |            |                  |                  |       |            |                  |      |       |                                         | 10033R-2   | Wing phenotype/Lethal |     |       |
| CG10079           | Egfr        | 43268           | Lethal             |                |       |            |                  |                  |       | 43268      | Wing phenotype   |      |       |                                         | 43268      | Wing phenotype        |     |       |
|                   |             | 43267           | Wing phenotype     |                |       |            |                  |                  |       |            |                  |      |       |                                         |            |                       |     |       |
|                   |             | 107130          | Wing phenotype     |                |       | 107130     | Lethal           |                  |       |            |                  |      |       |                                         | 107130     | Lethal                |     |       |
|                   |             | 10079R-2        |                    |                |       |            |                  |                  |       |            |                  |      |       |                                         |            |                       |     |       |
| CG10082           |             | 38327           |                    |                |       |            |                  |                  |       |            |                  |      |       |                                         |            |                       |     |       |
| CG10155           | Spred       |                 | 103749             |                |       |            |                  |                  |       |            |                  |      |       |                                         |            |                       |     |       |
|                   |             |                 | 18024              |                |       |            |                  |                  |       |            |                  |      |       |                                         |            |                       |     |       |
| CG10177           |             |                 | 18025              |                |       |            |                  |                  |       |            |                  |      |       |                                         |            |                       |     |       |
|                   |             |                 | 38349              |                |       |            |                  |                  |       |            |                  |      |       |                                         |            |                       |     |       |
|                   |             |                 | 107848             |                |       |            |                  |                  |       |            |                  |      |       |                                         |            |                       |     |       |
| CG10244           | Cad96Ca     |                 | 1091               | Wing phenotype |       |            |                  |                  |       |            |                  |      |       |                                         |            |                       |     |       |
|                   |             |                 | 8402               | Wing phenotype |       |            |                  |                  |       |            |                  |      |       |                                         |            |                       |     |       |
| CG10260           |             |                 | 15993              | Wing phenotype |       |            |                  |                  |       |            |                  |      |       |                                         |            |                       |     |       |
|                   |             |                 | 105614             | Wing phenotype |       |            |                  |                  |       |            |                  |      |       |                                         |            |                       |     |       |
| CG10268           |             |                 | 110640             |                |       |            |                  |                  |       |            |                  |      |       |                                         |            |                       |     |       |
|                   |             |                 | 10268R-2           |                |       |            |                  |                  |       |            |                  |      |       |                                         |            |                       |     |       |
| CG10295           | Pak         |                 | 12553              | Wing phenotype |       |            |                  |                  |       |            |                  |      |       |                                         |            |                       |     |       |
|                   |             |                 | 108937             | Wing phenotype |       |            |                  |                  |       |            |                  |      |       |                                         |            |                       |     |       |
| CG10308           | CycJ        |                 | 31217              |                |       |            |                  |                  |       |            |                  |      |       |                                         |            |                       |     |       |
|                   |             |                 | 110222             |                |       |            |                  |                  |       |            |                  |      |       |                                         |            |                       |     |       |
|                   |             |                 | 104959             | Lethal         |       |            |                  |                  |       |            |                  |      |       |                                         |            |                       |     |       |
| CG10498           | cdc2c       |                 | 10498R-2           | Wing phenotype |       |            |                  |                  |       |            |                  |      |       |                                         |            |                       |     |       |
|                   |             |                 | 34856              |                |       |            |                  |                  |       |            |                  |      |       |                                         |            |                       |     |       |
| CG10504           | Ilk         |                 | 16062              | Wing phenotype |       |            |                  |                  |       |            |                  |      |       |                                         |            |                       |     |       |
| CG10522           | sticky      |                 | 47280              |                |       |            |                  |                  |       |            |                  |      |       |                                         |            |                       |     |       |
|                   |             |                 | 100265             |                |       |            |                  |                  |       |            |                  |      |       |                                         |            |                       |     |       |
| CG10539           | S6k         |                 | 18126              | Wing phenotype |       |            |                  |                  |       |            |                  |      |       |                                         |            |                       |     |       |
|                   |             |                 | 104369             | Wing phenotype |       |            |                  |                  |       |            |                  |      |       |                                         |            |                       |     |       |
| CG10572           | Cdk8        |                 | 45370              | Wing phenotype |       |            |                  |                  |       |            |                  |      |       |                                         |            |                       |     |       |
|                   |             |                 | 107187             | Wing phenotype |       |            |                  |                  |       |            |                  |      |       |                                         |            |                       |     |       |
| CG10579           | Eip63E      | 47860           | Wing phenotype     |                |       | 47860      | Lethal           |                  |       | 47860      | Wing phenotype   |      |       |                                         | 47860      | Wing phenotype        |     |       |
|                   |             | 106824          | Wing phenotype     |                |       |            |                  |                  |       |            |                  |      |       |                                         |            |                       |     |       |
|                   |             | 50599           | Wing phenotype     |                |       | 50599      | Wing phenotype   |                  |       |            |                  |      |       |                                         | 50599      | Wing phenotype        |     |       |
|                   |             |                 | 10579R-3           | Wing phenotype |       |            |                  |                  |       |            |                  |      |       |                                         |            |                       |     |       |
| CG10637           | Nak         |                 | 35482              |                |       |            |                  |                  |       |            |                  |      |       |                                         |            |                       |     |       |
|                   |             |                 | 109507             |                |       |            |                  |                  |       |            |                  |      |       |                                         |            |                       |     |       |
| CG10673           |             |                 | 27301              |                |       |            |                  |                  |       |            |                  |      |       |                                         |            |                       |     |       |
| CG10702           |             | 27052           | Wing phenotype     |                |       |            |                  |                  |       |            |                  |      |       |                                         | 27052      | Wing phenotype        |     |       |
|                   |             | 3691            | Wing phenotype     |                |       | 3691       | Lethal           |                  |       | 3691       | Wing phenotype   |      |       |                                         | 3691       | Wing phenotype        |     |       |
|                   |             | 100842          |                    |                |       | 100842     |                  |                  |       |            |                  |      |       |                                         |            |                       |     |       |
| CG10738           |             |                 | 28580              |                |       |            |                  |                  |       |            |                  |      |       |                                         |            |                       |     |       |
|                   |             |                 | 10738R-1           |                |       |            |                  |                  |       |            |                  |      |       |                                         |            |                       |     |       |

|         |         |                                         |                                                    |                               |        |                |  |                    |                                  |
|---------|---------|-----------------------------------------|----------------------------------------------------|-------------------------------|--------|----------------|--|--------------------|----------------------------------|
| CG10776 | wit     | 42244<br>865<br>103808<br>10776R-2      |                                                    |                               |        |                |  |                    |                                  |
| CG10895 | lok     | 44980<br>110342                         |                                                    |                               |        |                |  |                    |                                  |
| CG10933 |         | 46726<br>46727<br>104282                | Wing phenotype<br>Wing phenotype<br>Wing phenotype |                               |        |                |  |                    |                                  |
| CG10951 | niki    | 16120<br>100823                         |                                                    |                               |        |                |  |                    |                                  |
| CG10967 | Atg1    | 16133<br>10967R-1                       |                                                    |                               |        |                |  |                    |                                  |
| CG1098  | Madm    | 27347<br>101758                         | Wing phenotype                                     |                               |        |                |  |                    |                                  |
| CG1107  | aux     | 16182<br>103426                         | Wing phenotype<br>Wing phenotype                   |                               | 16182  |                |  | 16182<br>103426    | Lethal<br>Lethal                 |
| CG11221 |         | 100163<br>42947<br>29603                | Wing phenotype<br>Wing phenotype                   |                               |        |                |  |                    |                                  |
| CG11228 | hpo     | 7823<br>104169<br>27661                 | Wing phenotype<br>Wing phenotype<br>Wing phenotype |                               |        |                |  |                    |                                  |
| CG11249 |         | 18196<br>108319                         |                                                    |                               |        |                |  |                    |                                  |
| CG11255 |         | 17533<br>17534                          |                                                    |                               |        |                |  |                    |                                  |
| CG11420 | png     | 31500<br>11420R-3                       |                                                    |                               |        |                |  |                    |                                  |
| CG11486 |         | 106497<br>51711<br>11486R-3<br>11486R-4 | Wing phenotype<br>Wing phenotype                   | 11486R-3<br>11486R-4          | 106497 | Wing phenotype |  | 106497<br>11486R-3 | Wing phenotype<br>Wing phenotype |
| CG11489 | srpk79D | 47544<br>102632                         |                                                    |                               |        |                |  |                    |                                  |
| CG11525 | CycG    | 13655<br>106846                         |                                                    |                               |        |                |  |                    |                                  |
| CG11533 | Asator  | 45120<br>45121                          |                                                    |                               |        |                |  |                    |                                  |
| CG11594 |         | 28311<br>105487                         |                                                    |                               |        |                |  |                    |                                  |
| CG11621 | Pi3K68D | 16240<br>109582                         |                                                    |                               |        |                |  |                    |                                  |
| CG11660 |         | 18526<br>105395                         | Wing phenotype<br>Wing phenotype                   |                               |        |                |  |                    |                                  |
| CG11811 |         | 30915<br>110740                         |                                                    |                               |        |                |  |                    |                                  |
| CG11859 |         | 47401<br>109296                         | Wing phenotype<br>Wing phenotype                   | 11859R-2<br>11859R-3<br>31580 | 109296 |                |  | 47401<br>109296    | Wing phenotype<br>Wing phenotype |
| CG12019 | Cdc37   | 47776<br>110727                         | Lethal<br>Lethal                                   |                               | 110727 | Wing phenotype |  | 47776<br>110727    | Wing phenotype<br>Wing phenotype |
| CG12066 | Pka-C2  | 30658<br>108424<br>23719                |                                                    |                               |        |                |  |                    |                                  |
| CG12069 |         | 100886<br>9928                          | Wing phenotype                                     |                               |        |                |  |                    |                                  |
| CG12072 | warts   | 106174<br>12072R-1                      | Lethal<br>Wing phenotype                           |                               |        |                |  |                    |                                  |
| CG1210  | Pdk1    | 18736<br>109812                         | Wing phenotype<br>Wing phenotype                   |                               |        |                |  |                    |                                  |

|         |         |                                         |                                                    |                                         |                   |                                    |                             |                                                    |
|---------|---------|-----------------------------------------|----------------------------------------------------|-----------------------------------------|-------------------|------------------------------------|-----------------------------|----------------------------------------------------|
| CG12147 |         | 31659<br>101875                         |                                                    |                                         |                   |                                    |                             |                                                    |
| CG1216  | mri     | 17043<br>101345                         |                                                    |                                         |                   |                                    |                             |                                                    |
| CG12229 |         | 31704<br>101097                         | Wing phenotype                                     |                                         |                   |                                    |                             |                                                    |
| CG12244 | lic     | 106822<br>20166                         |                                                    |                                         |                   |                                    |                             |                                                    |
| CG1227  |         | 38648<br>105610                         | Wing phenotype                                     |                                         |                   |                                    |                             |                                                    |
| CG12289 |         | 31725<br>105685                         |                                                    |                                         |                   |                                    |                             |                                                    |
| CG12306 | polo    | 20177<br>12306R-2<br>12306R-3           | Wing phenotype<br>Wing phenotype                   | 12306R-2                                | 20177<br>12306R-3 | Wing phenotype<br>Wing phenotype   | 20177<br>12306R-3           | Wing phenotype<br>Wing phenotype                   |
| CG12559 | rl      | 43123<br>109108<br>13044                | Wing phenotype                                     |                                         |                   |                                    |                             |                                                    |
| CG1271  |         | 110178                                  |                                                    |                                         |                   |                                    |                             |                                                    |
| CG13369 |         | 17161<br>17158<br>100747<br>13369R-1    | Wing phenotype<br>Wing phenotype<br>Wing phenotype | 17161<br>13369R-1                       | 100747            | Lethal<br>Wing phenotype           | 17161<br>100747<br>13369R-1 | Wing phenotype<br>Wing phenotype<br>Wing phenotype |
| CG13388 | Akap200 | 5647<br>102374                          | Wing phenotype<br>Wing phenotype                   |                                         |                   |                                    |                             |                                                    |
| CG1344  |         | 108838                                  |                                                    |                                         |                   |                                    |                             |                                                    |
| CG13591 | Ssl     | 17282<br>108692                         |                                                    |                                         |                   |                                    |                             |                                                    |
| CG1362  | cdc2rk  | 32249<br>100299                         |                                                    |                                         |                   |                                    |                             |                                                    |
| CG13688 | lpk2    | 43824<br>43825                          |                                                    |                                         |                   |                                    |                             |                                                    |
| CG1389  | tor     | 36280<br>101154                         |                                                    |                                         |                   |                                    |                             |                                                    |
| CG14026 | tkv     | 3059<br>105834                          | Lethal<br>Lethal                                   |                                         | 105834            | Wing phenotype                     | 3059<br>105834              | Wing phenotype<br>Wing phenotype                   |
| CG14030 | Bub1    | 101096<br>24833<br>14030R-1<br>14030R-2 | Wing phenotype<br>Wing phenotype                   | 101096<br>24833<br>14030R-1<br>14030R-2 | 101096            | Wing phenotype<br>Lethal<br>Lethal | 101096<br>24833<br>14030R-2 | Lethal<br>Lethal                                   |
| CG14217 | Tao     | 17432<br>107645                         | Wing phenotype<br>Wing phenotype                   |                                         |                   |                                    |                             |                                                    |
| CG14305 |         | 17477<br>17478<br>14305R-3              |                                                    |                                         |                   |                                    |                             |                                                    |
| CG14396 | Ret     | 30832<br>107648                         |                                                    |                                         |                   |                                    |                             |                                                    |
| CG14895 | Pak3    | 44607<br>107260                         |                                                    |                                         |                   |                                    |                             |                                                    |
| CG14939 | CycY    | 107010<br>32335<br>34009                | Wing phenotype<br>Wing phenotype                   | 107010<br>32335<br>32334                | 107010            | Wing phenotype<br>Wing phenotype   | 107010<br>32334             |                                                    |
| CG1495  | CaMK1   | 101380<br>1495R-2<br>39857              | Wing phenotype                                     |                                         |                   |                                    |                             |                                                    |
| CG14992 | Ack     | 14992R-1<br>33899                       | Wing phenotype<br>Wing phenotype/Lethal            |                                         |                   |                                    |                             |                                                    |
| CG1511  | Eph     | 4771<br>110448                          |                                                    |                                         |                   |                                    |                             |                                                    |
| CG15218 | Cyck    | 36216<br>110774                         | Wing phenotype<br>Wing phenotype                   |                                         | 36216             | Wing phenotype                     | 36216<br>110774             | Wing phenotype<br>Wing phenotype                   |



|         |               |                                         |                                            |                                                 |                        |                                                                       |
|---------|---------------|-----------------------------------------|--------------------------------------------|-------------------------------------------------|------------------------|-----------------------------------------------------------------------|
| CG15224 | Ckll $\beta$  | 32378<br>106845                         | Wing phenotype/Lethal<br>Wing phenotype    |                                                 | 106845  Wing phenotype | 32378  Wing phenotype<br>106845  Wing phenotype                       |
| CG15547 |               | 32621<br>104520                         |                                            |                                                 |                        |                                                                       |
| CG15793 | Dsor1         | 40026<br>40025                          | Wing phenotype<br>Wing phenotype           | 32920  Lethal                                   | 40026  Wing phenotype  | 40026  Wing phenotype<br>32920  Wing phenotype                        |
| CG15862 | Pka-R2        | 39437<br>101763                         |                                            |                                                 |                        |                                                                       |
| CG1594  | hop           | 102830<br>40037<br>32966                | Wing phenotype<br>Wing phenotype           |                                                 |                        |                                                                       |
| CG1609  | Gcn2          | 32664<br>103976                         | Wing phenotype                             | 32664                                           | 103976                 | 32664  Wing phenotype<br>103976  Wing phenotype<br>1609R-4<br>1609R-2 |
| CG16708 | Cerk          | 43412<br>101550                         | Wing phenotype                             |                                                 |                        |                                                                       |
| CG16903 |               | 37570<br>37572                          | Wing phenotype<br>Lethal                   |                                                 |                        |                                                                       |
| CG16910 | key           | 7723<br>100257                          |                                            |                                                 |                        |                                                                       |
| CG16973 | msn           | 101517<br>16973R-2                      | Lethal                                     |                                                 |                        |                                                                       |
| CG17010 |               | 28791<br>17010R-2<br>17010R-3           | Wing phenotype                             |                                                 |                        |                                                                       |
| CG17090 | hipk          | 108254<br>32855<br>17090R-1             | Wing phenotype<br>Wing phenotype<br>Lethal | 108254  Wing phenotype<br>32855  Wing phenotype | 32855  Wing phenotype  | 108254  Wing phenotype<br>32855  Wing phenotype                       |
| CG17146 | Adk1          | 25214<br>104475                         |                                            |                                                 |                        |                                                                       |
| CG17161 | grp           | 12680<br>110076                         |                                            |                                                 |                        |                                                                       |
| CG17216 | KP78b         | 51996<br>105265                         |                                            |                                                 |                        |                                                                       |
| CG17245 | plexB         | 27220<br>12167<br>46687<br>17245R-2     |                                            |                                                 |                        |                                                                       |
| CG1725  | dlg1          | 41134<br>109274                         | Lethal                                     | 109274<br>41136  Lethal                         | 41136  Wing phenotype  | 41134  Wing phenotype<br>109274                                       |
| CG17256 | Nek2          | 1725R-2<br>1725R-1                      | Lethal                                     |                                                 |                        |                                                                       |
| CG17299 | SNF4Ay        | 40052<br>103408<br>17299R-1<br>17299R-3 |                                            |                                                 |                        |                                                                       |
| CG17342 | Lk6           | 34726<br>32885                          | Wing phenotype                             |                                                 |                        |                                                                       |
| CG17348 | drl           | 109663<br>27053<br>100039               |                                            |                                                 |                        |                                                                       |
| CG1747  | Sk1           | 32932<br>32930                          |                                            |                                                 |                        |                                                                       |
| CG17471 |               | 1747R-3                                 |                                            |                                                 |                        |                                                                       |
| CG17520 | Ckll $\alpha$ | 17520R-2<br>31645                       | Wing phenotype<br>Wing phenotype           | 17520R-2  Lethal<br>31645  Lethal               | 31645                  | 17520R-2  Wing phenotype<br>31645  Wing phenotype                     |
| CG17528 |               | 26292<br>27057                          |                                            |                                                 |                        |                                                                       |
| CG17550 | dent          |                                         |                                            |                                                 |                        |                                                                       |

|         |           |          |                       |         |                |         |                       |
|---------|-----------|----------|-----------------------|---------|----------------|---------|-----------------------|
| CG17599 | unt       | 106056   |                       |         |                |         |                       |
| CG17596 | S6klI     | 5702     |                       |         |                |         |                       |
|         |           | 101451   |                       |         |                |         |                       |
| CG17603 | Taf1      | 41099    | Lethal                |         |                |         |                       |
|         |           | 106119   | Wing phenotype        |         |                |         |                       |
| CG17698 |           | 35634    | Wing phenotype        |         |                |         |                       |
|         |           | 105884   |                       |         |                |         |                       |
| CG1772  | dap       | 36720    |                       |         |                |         |                       |
| CG17998 | Gprk2     | 1835     |                       | 1835    |                | 1835    |                       |
|         |           | 101463   |                       | 101463  | Wing phenotype | 101463  | Wing phenotype        |
|         |           | 34843    | Wing phenotype        |         |                | 34843   | Wing phenotype/Lethal |
| CG18069 | CaMKII    | 47280    |                       |         |                |         |                       |
|         |           | 100265   |                       |         |                |         |                       |
| CG18085 | sev       | 49925    |                       |         |                |         |                       |
|         |           | 107048   |                       |         |                |         |                       |
| CG18247 | shark     | 105706   |                       |         |                |         |                       |
|         |           | 25304    |                       |         |                |         |                       |
|         |           | 18255R-1 | Wing phenotype        |         |                |         |                       |
| CG18255 | Strn-Mlck | 18255R-3 |                       |         |                |         |                       |
|         |           | 26736    |                       |         |                |         |                       |
|         |           | 31891    |                       |         |                |         |                       |
|         |           | 110638   |                       |         |                |         |                       |
| CG1830  | PhKy      | 33054    | Wing phenotype/Lethal |         |                |         |                       |
|         |           | 52478    |                       |         |                |         |                       |
| CG18374 | Gyk       | 110806   |                       |         |                |         |                       |
|         |           | 18374R-3 |                       |         |                |         |                       |
| CG18402 | InR       | 991      | Wing phenotype        |         |                |         |                       |
|         |           | 992      | Wing phenotype        |         |                |         |                       |
| CG1848  | LIMK1     | 25343    |                       |         |                |         |                       |
|         |           | 25344    |                       |         |                |         |                       |
| CG18492 | Tak1      | 101357   |                       |         |                |         |                       |
|         |           | 1388R-2  |                       |         |                |         |                       |
| CG1851  | Ady43A    | 33133    |                       |         |                |         |                       |
|         |           | 1851R-2  |                       |         |                |         |                       |
|         |           | 109880   |                       |         |                |         |                       |
| CG18582 | mbt       | 46044    |                       |         |                |         |                       |
|         |           | 29379    |                       |         |                |         |                       |
| CG18854 |           | 31732    |                       |         |                |         |                       |
| CG1891  | sax       | 42457    | Wing phenotype        |         |                |         |                       |
|         |           | 46358    | Wing phenotype        |         |                |         |                       |
| CG1915  | sls       | 47298    |                       |         |                |         |                       |
|         |           | 47301    | Wing phenotype        |         |                |         |                       |
| CG1939  | Dpck      | 44765    |                       |         |                |         |                       |
|         |           | 100276   | Wing phenotype        |         |                |         |                       |
| CG1951  |           | 33430    |                       |         |                |         |                       |
|         |           | 33431    |                       |         |                |         |                       |
| CG1954  | Pkc98E    | 33434    |                       |         |                |         |                       |
|         |           | 108151   | Wing phenotype        |         |                |         |                       |
|         |           | 19275    |                       |         |                |         |                       |
| CG1973  | yata      | 110214   |                       |         |                |         |                       |
| CG2028  | CkIa      | 13664    | Lethal                |         |                | 13664   | Lethal                |
|         |           | 110768   | Wing phenotype/Lethal |         |                | 110768  | Lethal                |
|         |           | 25786    | Lethal                |         |                |         |                       |
| CG2048  | dco       | 9241     | Wing phenotype        | 9241    | Lethal         | 9241    | Wing phenotype        |
|         |           | 2048R-1  |                       | 2048R-1 |                | 2048R-1 |                       |
|         |           | 2048R-3  |                       | 2048R-3 |                | 2048R-3 |                       |
|         |           | 27719    |                       |         |                |         |                       |
| CG2049  | Pkn       | 108870   | Lethal                |         |                |         |                       |
|         |           | 2055R-2  |                       |         |                |         |                       |
|         |           | 28335    |                       |         |                |         |                       |
| CG2087  | PEK       | 16427    | Wing phenotype        |         |                |         |                       |
|         |           | 110278   |                       |         |                |         |                       |

|         |          |                                     |                                                     |                              |                                            |                                                                                                                          |
|---------|----------|-------------------------------------|-----------------------------------------------------|------------------------------|--------------------------------------------|--------------------------------------------------------------------------------------------------------------------------|
| CG2201  |          | 33502<br>108958                     |                                                     |                              |                                            |                                                                                                                          |
| CG2210  | awd      | 110782<br>2210R-2                   | Wing phenotype                                      | 110782<br>2210R-1<br>33712   | Wing phenotype<br>Lethal                   | 2210R-2<br>Wing phenotype<br>110782<br>2210R-2<br>Wing phenotype<br>2210R-1<br>Wing phenotype<br>33712<br>Wing phenotype |
| CG2246  |          | 48878<br>110389                     | Wing phenotype                                      |                              |                                            |                                                                                                                          |
| CG2252  | fs(1)h   | 51227<br>51305<br>108662<br>2252R-2 | Wing phenotype/Lethal<br>Lethal<br>Lethal<br>Lethal |                              |                                            | 51305<br>Wing phenotype<br>51305<br>Wing phenotype/Lethal<br>108662<br>Wing phenotype                                    |
| CG2272  | slpr     | 33518<br>106449<br>2272R-1          | Wing phenotype                                      | 106449<br>2272R-1            | Wing phenotype                             | 33518<br>Wing phenotype<br>33518<br>Wing phenotype<br>2272R-1                                                            |
| CG2577  |          | 41694<br>105471<br>49366<br>103748  | Wing phenotype                                      |                              |                                            |                                                                                                                          |
| CG2615  | ik2      |                                     |                                                     |                              |                                            |                                                                                                                          |
| CG2621  | sgg      | 101538<br>2621R-3<br><br>31308      | Wing phenotype<br>Wing phenotype                    | 101538<br>2621R-3<br>2621R-1 | Lethal<br>Wing phenotype<br>Wing phenotype | 101538<br>Wing phenotype<br>101538<br>Wing phenotype<br>2621R-3<br>Wing phenotype                                        |
| CG2699  | Pi3K21B  | 104179<br>33556<br>13369<br>109682  | Wing phenotype                                      |                              |                                            |                                                                                                                          |
| CG2794  |          | 20909<br>107766<br>100266           | Wing phenotype<br>Wing phenotype                    |                              |                                            |                                                                                                                          |
| CG2845  | phl      | 45041<br>110621                     | Wing phenotype<br>Wing phenotype                    |                              |                                            |                                                                                                                          |
| CG2846  |          |                                     |                                                     |                              |                                            |                                                                                                                          |
| CG2899  | ksr      |                                     |                                                     |                              |                                            |                                                                                                                          |
| CG2929  | Pi4KIIa  | 40995<br>110687                     | Wing phenotype                                      | 40995<br>110687              | Wing phenotype                             | 40995<br>Wing phenotype<br>110687<br>Wing phenotype                                                                      |
| CG2964  |          | 42293<br>109509                     | Wing phenotype                                      |                              |                                            |                                                                                                                          |
| CG3001  | Hex-A    | 21054<br>104680                     |                                                     |                              |                                            |                                                                                                                          |
| CG30021 | metro    | 29965<br>110814                     |                                                     |                              |                                            |                                                                                                                          |
| CG3008  |          | 52634<br>103828                     |                                                     |                              |                                            |                                                                                                                          |
| CG30184 |          | 3539<br>104976                      |                                                     |                              |                                            |                                                                                                                          |
| CG30295 | lpk1     | 47790<br>109497                     |                                                     |                              |                                            |                                                                                                                          |
| CG3051  | SNF1A    | 1827<br>106200                      |                                                     |                              |                                            |                                                                                                                          |
| CG3068  | aur      | 108446<br>35763                     |                                                     |                              |                                            |                                                                                                                          |
| CG3086  | MAPk-Ak2 | 3170<br>110317                      |                                                     |                              |                                            |                                                                                                                          |
| CG31003 | gskt     | 25640<br>107429                     | Wing phenotype                                      |                              |                                            |                                                                                                                          |
| CG3105  | Pask     | 25661<br>107025                     |                                                     |                              |                                            |                                                                                                                          |
| CG31097 |          | 107652<br>33761                     |                                                     |                              |                                            |                                                                                                                          |
| CG31127 | Wsck     |                                     |                                                     |                              |                                            |                                                                                                                          |
| CG31140 |          | 38936<br>101347                     |                                                     |                              |                                            |                                                                                                                          |
| CG31183 |          | 859<br>4773                         |                                                     |                              |                                            |                                                                                                                          |

|         |           |                                                   |                                                      |                                |                          |                                                                      |
|---------|-----------|---------------------------------------------------|------------------------------------------------------|--------------------------------|--------------------------|----------------------------------------------------------------------|
| CG3127  | Pgk       | 33798<br>110081                                   |                                                      |                                |                          |                                                                      |
| CG31349 | pyd       | 38863<br>104159                                   |                                                      |                                |                          |                                                                      |
| CG3140  | Adk2      | 25046<br>107326                                   | Wing phenotype<br>Wing phenotype                     |                                |                          |                                                                      |
| CG31421 | Tak1      | 25760<br>110765                                   |                                                      |                                |                          |                                                                      |
| CG31643 |           | 31643R-1<br>31643R-2                              |                                                      |                                |                          |                                                                      |
| CG3172  | twf       | 25817<br>21415                                    |                                                      |                                |                          |                                                                      |
| CG31751 |           | 110319<br>105621                                  |                                                      |                                |                          |                                                                      |
| CG31873 |           | 36375<br>46252                                    |                                                      |                                |                          |                                                                      |
| CG32019 | bt        | 46253<br>34036                                    |                                                      |                                |                          |                                                                      |
| CG32031 | Argk      | 34037<br>27106                                    |                                                      |                                |                          |                                                                      |
| CG32134 | btl       | 110277<br>29915                                   |                                                      |                                |                          |                                                                      |
| CG3216  |           | 107985<br>34547                                   |                                                      |                                |                          |                                                                      |
| CG32417 | Myt1      | 105157<br>101018                                  |                                                      |                                |                          |                                                                      |
| CG32484 | Sk2       | 41905<br>26534                                    |                                                      |                                |                          |                                                                      |
| CG32649 |           | 26536                                             |                                                      |                                |                          |                                                                      |
| CG32666 | Drak      | 107263<br>32961<br>44374<br><a href="#">29449</a> | Lethal                                               | 44374<br><a href="#">29449</a> | 107263<br>Wing phenotype | 107263<br>Lethal<br>44374<br><a href="#">29449</a><br>Wing phenotype |
| CG32703 |           | 13444<br>109661                                   |                                                      |                                |                          |                                                                      |
| CG32717 | sdt       | 29844<br>100685                                   |                                                      |                                |                          |                                                                      |
| CG32742 | I(1)G0148 | 40716<br>104902                                   |                                                      |                                |                          |                                                                      |
| CG32743 | nonC      | 41990<br>108450                                   |                                                      |                                |                          |                                                                      |
| CG3277  |           | 7271<br>108052                                    |                                                      |                                |                          |                                                                      |
| CG32849 | Hex-t2    | 47331<br>100218                                   |                                                      |                                |                          |                                                                      |
| CG32944 |           | 29286<br>103642                                   |                                                      |                                |                          |                                                                      |
| CG33102 | Hex-t1    | 46573<br>46574                                    |                                                      |                                |                          |                                                                      |
| CG33114 | Gyc32E    | 108142<br>10442                                   |                                                      |                                |                          |                                                                      |
| CG3319  | Cdk7      | 103413                                            | Wing phenotype<br>Wing phenotype                     |                                |                          |                                                                      |
| CG3324  | Pkg21D    | 34594<br>103513                                   |                                                      |                                |                          |                                                                      |
| CG33338 | p38c      | 105173<br>29412                                   |                                                      |                                |                          |                                                                      |
| CG33519 | Unc-89    | 106267                                            | Wing phenotype                                       |                                |                          |                                                                      |
| CG33531 | Ddr       | 52126<br>101831                                   |                                                      |                                |                          |                                                                      |
| CG33554 | Nipped-A  | 44781<br>52487<br>52486<br>2905R-3<br>49772       | Wing phenotype<br>Lethal<br>Lethal<br>Wing phenotype | 44781<br>Lethal                | 52487<br>Wing phenotype  | 44781<br>Wing phenotype<br>52487<br>Wing phenotype                   |
| CG33671 |           | 49772                                             |                                                      |                                |                          |                                                                      |

|         |          |                 |                       |         |        |                                                                         |
|---------|----------|-----------------|-----------------------|---------|--------|-------------------------------------------------------------------------|
| CG33981 |          | 49773           |                       |         |        |                                                                         |
| CG3400  | Pfrx     | 25958<br>25959  |                       |         |        |                                                                         |
| CG34344 | rdgA     | 102909<br>3024  |                       |         |        |                                                                         |
| CG34356 |          | 5201            | Wing phenotype        |         |        |                                                                         |
| CG34357 |          | 28745<br>109790 | Wing phenotype        |         |        |                                                                         |
|         |          | 105185<br>31983 |                       |         |        |                                                                         |
| CG34359 | IP3K2    | 19159           |                       | 1630R-2 | 102772 | 19159 Wing phenotype<br>1630R-2 Wing phenotype<br>102772 Wing phenotype |
|         |          | 102772          | Wing phenotype        |         |        |                                                                         |
| CG34361 | Dgk      | 38239           | Wing phenotype/Lethal |         |        |                                                                         |
|         |          | 105753          |                       |         |        |                                                                         |
| CG34380 |          | 29459           |                       |         |        |                                                                         |
|         |          | 39447           |                       |         |        |                                                                         |
| CG34384 |          | 39446           |                       |         |        |                                                                         |
|         |          | 102481          |                       |         |        |                                                                         |
| CG34392 | Epac     | 43739           | Wing phenotype        |         |        |                                                                         |
|         |          | 110077          |                       |         |        |                                                                         |
|         |          | 50373           |                       |         |        |                                                                         |
| CG34412 | tlk      | 105732          | Wing phenotype/Lethal | 105732  | 105732 | 105732 Wing phenotype<br>20905 Lethal                                   |
|         |          | 20905           |                       |         |        |                                                                         |
|         |          | 2829R-1         | Lethal                |         |        |                                                                         |
|         |          | 33983           | Lethal                |         |        |                                                                         |
| CG3510  | CycB     | 43772           |                       |         |        |                                                                         |
|         |          | 109611          |                       |         |        |                                                                         |
| CG3525  | eas      | 103784          | Wing phenotype        |         |        |                                                                         |
|         |          | 34286           |                       |         |        |                                                                         |
| CG3534  |          | 109666          |                       |         |        |                                                                         |
|         |          | 41276           |                       |         |        |                                                                         |
| CG3544  |          | 21685           |                       |         |        |                                                                         |
|         |          | 105459          |                       |         |        |                                                                         |
| CG3608  |          | 106695          |                       |         |        |                                                                         |
|         |          | 3608R-2         |                       |         |        |                                                                         |
| CG3682  | PIP5K59B | 47027           |                       |         |        |                                                                         |
|         |          | 108104          |                       |         |        |                                                                         |
| CG3738  | Cks30A   | 108401          |                       |         |        |                                                                         |
|         |          | 108975          |                       |         |        |                                                                         |
| CG3809  |          | 43780           |                       |         |        |                                                                         |
|         |          | 44576           | Wing phenotype        |         |        |                                                                         |
| CG3837  |          | 105549          |                       |         |        |                                                                         |
|         |          | 40484           |                       |         |        |                                                                         |
| CG3915  | Drl-2    | 102192          |                       |         |        |                                                                         |
|         |          | 52662           |                       |         |        |                                                                         |
| CG3938  | CycE     | 110204          | Wing phenotype        |         |        |                                                                         |
|         |          | 2902            | Wing phenotype        |         |        |                                                                         |
| CG4006  | Akt1     | 103703          |                       |         |        |                                                                         |
|         |          | 103804          |                       |         |        |                                                                         |
| CG4007  | Nrk      | 42442           |                       |         |        |                                                                         |
|         |          | 107207          |                       |         |        |                                                                         |
| CG4012  | gek      | 28367           |                       |         |        |                                                                         |
| CG40129 | Gprk1    | 28354           |                       |         |        |                                                                         |
| CG4026  | IP3K1    | 31733           |                       |         |        |                                                                         |
|         |          | 27305           |                       |         |        |                                                                         |
| CG40293 | Stlk     | 34620           |                       |         |        |                                                                         |
|         |          | 2897            |                       |         |        |                                                                         |
| CG4032  | Abl      | 110186          |                       |         |        |                                                                         |
|         |          | 108887          |                       |         |        |                                                                         |
| CG4041  |          | 34780           |                       |         |        |                                                                         |

|         |          |                                       |                                  |        |  |        |        |                |
|---------|----------|---------------------------------------|----------------------------------|--------|--|--------|--------|----------------|
| CG40478 | Dyrk3    |                                       |                                  |        |  |        |        |                |
| CG4132  | pkaap    | 21792<br>106808                       | Wing phenotype                   |        |  |        |        |                |
| CG4141  | PI3K92E  | 38985<br>107390                       | Wing phenotype                   |        |  |        |        |                |
| CG4201  | ird5     | 26427                                 |                                  |        |  |        |        |                |
| CG42273 | mnb      | 28628<br>107066                       | Wing phenotype                   |        |  |        |        |                |
| CG42317 | Csk      | 109813<br>32877                       | Lethal                           |        |  |        |        |                |
| CG42320 | Doa      | 20120<br>102520                       | Wing phenotype                   |        |  |        |        |                |
| CG42341 | Pka-R1   | 103720<br>26329                       |                                  |        |  |        |        |                |
| CG42347 |          | 101640<br>44737                       |                                  |        |  |        |        |                |
| CG42349 | Pkcδ     | 33838<br>101421                       |                                  |        |  |        |        |                |
| CG42366 |          | 108102<br>39904                       | Wing phenotype<br>Lethal         |        |  |        |        |                |
| CG42403 | Ca-β     | 36112<br>27581                        |                                  |        |  |        |        |                |
| CG4252  | mei-41   | 105748<br>103624                      |                                  |        |  |        |        |                |
| CG42636 | Gyc76c   | 11251<br>106525<br>27094              |                                  |        |  |        |        |                |
| CG4268  | PitsIre  | 107303<br>45127                       | Wing phenotype                   | 107303 |  | Lethal | 107303 | Wing phenotype |
| CG42783 | aPKC     | 2907<br>105624<br>34332               | Wing phenotype<br>Wing phenotype | 2907   |  | Lethal | 105624 | Wing phenotype |
| CG42856 | Sik3     | 39866<br>107458                       |                                  |        |  |        |        |                |
| CG4290  | Sik2     | 103739<br>26497                       | Wing phenotype                   |        |  |        |        |                |
| CG43143 |          | 16334<br>106088                       |                                  |        |  |        |        |                |
| CG4353  | hep      | 109277<br>47509                       |                                  |        |  |        |        |                |
| CG43729 |          | 35848<br>35850<br>26065               |                                  |        |  |        |        |                |
| CG43741 | Ack-like | 100169<br>3969R-2                     |                                  |        |  |        |        |                |
| CG4379  | Pka-C1   | 31599<br>101524                       | Wing phenotype<br>Wing phenotype |        |  |        |        |                |
| CG4488  | wee      | 106329<br>26543                       |                                  |        |  |        |        |                |
| CG4523  | Pink1    | 109614<br>21860                       |                                  |        |  |        |        |                |
| CG4527  | slik     | 43783<br>43784                        | Wing phenotype<br>Wing phenotype |        |  |        |        |                |
| CG4546  |          | 34869<br>34868                        |                                  |        |  |        |        |                |
| CG4551  | smi35A   | 40535<br>101376<br>4551R-1<br>4551R-3 |                                  | 40535  |  |        | 101376 |                |
| CG4583  | Ire1     | 39561<br>39562                        |                                  |        |  |        |        |                |
| CG4629  |          | 26574<br>26573                        |                                  |        |  |        |        |                |
| CG4720  | Pka2R    | 110228                                |                                  |        |  |        |        |                |

|        |                     |                                                                |                                         |  |        |                |  |                            |                                                    |
|--------|---------------------|----------------------------------------------------------------|-----------------------------------------|--|--------|----------------|--|----------------------------|----------------------------------------------------|
| CG4798 | FRS2D<br>l(2)k01209 | 34892<br>106934<br>26628<br>104701<br>34898<br>100999<br>26642 |                                         |  |        |                |  |                            |                                                    |
| CG4803 | Tak12               | 932<br>935<br>24683<br>40577<br>40576                          |                                         |  |        |                |  |                            |                                                    |
| CG4839 |                     | 5092R-1<br>5092R-2<br>34639                                    | Wing phenotype                          |  |        |                |  |                            |                                                    |
| CG4926 | Ror                 | 110702<br>27360<br>30946                                       |                                         |  |        |                |  |                            |                                                    |
| CG4945 |                     | 104240                                                         | Wing phenotype                          |  |        |                |  |                            |                                                    |
| CG5072 | Cdk4                | 22024<br>107158                                                | Wing phenotype/Lethal                   |  |        |                |  |                            |                                                    |
| CG5092 | Tor                 |                                                                |                                         |  |        |                |  |                            |                                                    |
| CG5125 | ninaC               |                                                                |                                         |  |        |                |  |                            |                                                    |
| CG5144 |                     |                                                                |                                         |  |        |                |  |                            |                                                    |
| CG5169 | GckIII              |                                                                |                                         |  |        |                |  |                            |                                                    |
| CG5179 | Cdk9                | 30449<br>103561                                                | Lethal<br>Wing phenotype                |  | 30449  | Wing phenotype |  | 30449<br>103561            | lethal<br>lethal                                   |
| CG5182 | Pk34A               | 101146<br>27368<br>24440<br>103656                             |                                         |  |        |                |  |                            |                                                    |
| CG5288 |                     | 39402<br>110565                                                | Wing phenotype                          |  |        |                |  |                            |                                                    |
| CG5310 | nmdyn-D6            |                                                                |                                         |  |        |                |  |                            |                                                    |
| CG5363 | cdc2                | 106130<br>41839                                                | Lethal<br>Wing phenotype                |  | 106130 | Wing phenotype |  | 106130<br>41839            | Wing phenotype<br>Lethal                           |
| CG5373 | Pi3K59F             | 100296<br>5373R-2<br>33384                                     | Wing phenotype<br>Wing phenotype        |  |        |                |  |                            |                                                    |
| CG5387 | Cdk5a               | 34990<br>108656                                                | Wing phenotype<br>Wing phenotype        |  |        |                |  |                            |                                                    |
| CG5408 | trbl                | 22113<br>106774                                                |                                         |  |        |                |  |                            |                                                    |
| CG5452 | dnk                 | 39137<br>103385<br>102484                                      | Wing phenotype                          |  |        |                |  |                            |                                                    |
| CG5475 | Mpk2                | 52277                                                          |                                         |  |        |                |  |                            |                                                    |
| CG5483 | Lrrk                | 105630<br>22140<br>27469                                       |                                         |  |        |                |  |                            |                                                    |
| CG5626 |                     | 5626R-1                                                        | Wing phenotype                          |  |        |                |  |                            |                                                    |
| CG5680 | bsk                 | 104569<br>34138<br>44157                                       | Wing phenotype<br>Wing phenotype        |  |        |                |  |                            |                                                    |
| CG5725 | fbl                 | 101437<br>110460<br>27504<br>110683<br>45045                   |                                         |  |        |                |  |                            |                                                    |
| CG5757 |                     |                                                                |                                         |  |        |                |  |                            |                                                    |
| CG5790 |                     |                                                                |                                         |  |        |                |  |                            |                                                    |
| CG5940 | CycA                | 32421<br>103595                                                | Wing phenotype<br>Wing phenotype/Lethal |  | 32421  | Wing phenotype |  | 32421<br>5940R-4<br>103595 | Wing phenotype<br>Wing phenotype<br>Wing phenotype |
| CG5974 | pll                 | 103774<br>2889                                                 |                                         |  |        |                |  |                            |                                                    |
| CG6027 | cdi                 | 109409<br>43634<br>44165                                       |                                         |  |        |                |  |                            |                                                    |
| CG6092 | Dak1                | 104861                                                         |                                         |  |        |                |  |                            |                                                    |

|        |        |                                     |                                                                                                                                                                                                                       |                                                                                                                                                                                                                       |                                                                                                                                                                                                                                                                                         |  |                                                                                                                                                                                                                                                                                                                  |  |
|--------|--------|-------------------------------------|-----------------------------------------------------------------------------------------------------------------------------------------------------------------------------------------------------------------------|-----------------------------------------------------------------------------------------------------------------------------------------------------------------------------------------------------------------------|-----------------------------------------------------------------------------------------------------------------------------------------------------------------------------------------------------------------------------------------------------------------------------------------|--|------------------------------------------------------------------------------------------------------------------------------------------------------------------------------------------------------------------------------------------------------------------------------------------------------------------|--|
| CG6114 | sff    | 22224<br>100717<br>6117R-1          |                                                                                                                                                                                                                       |                                                                                                                                                                                                                       |                                                                                                                                                                                                                                                                                         |  |                                                                                                                                                                                                                                                                                                                  |  |
| CG6117 | Pka-C3 | 6117R-2<br>27569                    |                                                                                                                                                                                                                       |                                                                                                                                                                                                                       |                                                                                                                                                                                                                                                                                         |  |                                                                                                                                                                                                                                                                                                                  |  |
| CG6214 | MRP    | 105419<br>6214R-3                   |                                                                                                                                                                                                                       |                                                                                                                                                                                                                       |                                                                                                                                                                                                                                                                                         |  |                                                                                                                                                                                                                                                                                                                  |  |
| CG6292 | CycT   | 37562<br>103387<br>6292R-3          |  Lethal<br>Wing phenotype                                                                                                            |                                                                                                                                                                                                                       | 103387  Wing phenotype                                                                                            |  | 37562   Wing phenotype/Lethal<br>103387  Wing phenotype |  |
| CG6297 | JIL-1  | 107001<br>6297R-4                   |                                                                                                                                                                                                                       |                                                                                                                                                                                                                       |                                                                                                                                                                                                                                                                                         |  |                                                                                                                                                                                                                                                                                                                  |  |
| CG6343 | ND42   | 14444<br>110787                     | Wing phenotype<br>Wing phenotype                                                                                                                                                                                      |                                                                                                                                                                                                                       |                                                                                                                                                                                                                                                                                         |  |                                                                                                                                                                                                                                                                                                                  |  |
| CG6355 | fab1   | 27591<br>27592                      | Wing phenotype                                                                                                                                                                                                        |                                                                                                                                                                                                                       |                                                                                                                                                                                                                                                                                         |  |                                                                                                                                                                                                                                                                                                                  |  |
| CG6364 |        | 11693<br>108949                     |  Wing phenotype<br> Wing phenotype                  |                                                                                                                                                                                                                       | 108494  Wing phenotype                                                                                            |  | 11693   Wing phenotype<br>108949  Wing phenotype        |  |
| CG6386 | ball   | 48980<br>108630                     | Wing phenotype                                                                                                                                                                                                        |                                                                                                                                                                                                                       |                                                                                                                                                                                                                                                                                         |  |                                                                                                                                                                                                                                                                                                                  |  |
| CG6498 |        | 109282<br>35101                     |                                                                                                                                                                                                                       |                                                                                                                                                                                                                       |                                                                                                                                                                                                                                                                                         |  |                                                                                                                                                                                                                                                                                                                  |  |
| CG6509 |        | 101596<br>46234                     | Wing phenotype<br>Wing phenotype                                                                                                                                                                                      |                                                                                                                                                                                                                       |                                                                                                                                                                                                                                                                                         |  |                                                                                                                                                                                                                                                                                                                  |  |
| CG6518 | inaC   | 101719<br>2895                      |                                                                                                                                                                                                                       |                                                                                                                                                                                                                       |                                                                                                                                                                                                                                                                                         |  |                                                                                                                                                                                                                                                                                                                  |  |
| CG6521 | Stam   | 22497<br>35016                      | Wing phenotype<br>Wing phenotype                                                                                                                                                                                      |                                                                                                                                                                                                                       |                                                                                                                                                                                                                                                                                         |  |                                                                                                                                                                                                                                                                                                                  |  |
| CG6535 | tefu   | 22502<br>108074                     |                                                                                                                                                                                                                       |                                                                                                                                                                                                                       |                                                                                                                                                                                                                                                                                         |  |                                                                                                                                                                                                                                                                                                                  |  |
| CG6551 | fu     | 27662<br>27663                      | Wing phenotype<br>Wing phenotype                                                                                                                                                                                      |                                                                                                                                                                                                                       |                                                                                                                                                                                                                                                                                         |  |                                                                                                                                                                                                                                                                                                                  |  |
| CG6612 | Adk3   | 110382<br>42064                     |                                                                                                                                                                                                                       |                                                                                                                                                                                                                       |                                                                                                                                                                                                                                                                                         |  |                                                                                                                                                                                                                                                                                                                  |  |
| CG6620 | ial    | 104051<br>35107<br>6620R-3          |   Wing phenotype<br>Lethal<br>Wing phenotype/Lethal |                                                                                                                                                                                                                       | 35107   Wing phenotype         |  | 104051  Wing phenotype<br>35107  Wing phenotype                                                                                            |  |
| CG6622 | Pkc53E | 27696<br>27699                      |                                                                                                                                                                                                                       |                                                                                                                                                                                                                       |                                                                                                                                                                                                                                                                                         |  |                                                                                                                                                                                                                                                                                                                  |  |
| CG6703 | CASK   | 104793<br>34184                     |                                                                                                                                                                                                                       |                                                                                                                                                                                                                       |                                                                                                                                                                                                                                                                                         |  |                                                                                                                                                                                                                                                                                                                  |  |
| CG6715 | KP78a  | 26722<br>47657                      | Wing phenotype                                                                                                                                                                                                        |                                                                                                                                                                                                                       |                                                                                                                                                                                                                                                                                         |  |                                                                                                                                                                                                                                                                                                                  |  |
| CG6767 |        | 35111<br>35112<br>109894<br>6767R-1 |   Wing phenotype<br>Wing phenotype              | 35112                                                                                                                                                                                                                 | 109894   Wing phenotype  |  | 35112  Lethal<br>109894  Wing phenotype                                                                                                |  |
| CG6772 | Slob   | 100987<br>30674                     |                                                                                                                                                                                                                       |                                                                                                                                                                                                                       |                                                                                                                                                                                                                                                                                         |  |                                                                                                                                                                                                                                                                                                                  |  |
| CG6775 | rg     | 107056<br>36404                     |                                                                                                                                                                                                                       |                                                                                                                                                                                                                       |                                                                                                                                                                                                                                                                                         |  |                                                                                                                                                                                                                                                                                                                  |  |
| CG6800 |        | 40394<br>104255                     |                                                                                                                                                                                                                       |                                                                                                                                                                                                                       |                                                                                                                                                                                                                                                                                         |  |                                                                                                                                                                                                                                                                                                                  |  |
| CG6875 | asp    | 2911<br>110177                      | Wing phenotype                                                                                                                                                                                                        |                                                                                                                                                                                                                       |                                                                                                                                                                                                                                                                                         |  |                                                                                                                                                                                                                                                                                                                  |  |
| CG6963 | gish   | 106826<br>26003<br>28066            |  Wing phenotype<br>Wing phenotype<br>Wing phenotype                                                                                | 106826  Wing phenotype<br>26003  Wing phenotype | 106826                   |  | 106826  Wing phenotype<br>26003  Wing phenotype                                                                                        |  |
| CG7001 | Pk17E  | 101951<br>102179                    | Wing phenotype                                                                                                                                                                                                        |                                                                                                                                                                                                                       |                                                                                                                                                                                                                                                                                         |  |                                                                                                                                                                                                                                                                                                                  |  |
| CG7004 | fwd    | 27786<br>110159                     |                                                                                                                                                                                                                       |                                                                                                                                                                                                                       |                                                                                                                                                                                                                                                                                         |  |                                                                                                                                                                                                                                                                                                                  |  |
|        |        | 27808                               |  Wing phenotype                                                                                                                    |                                                                                                                                                                                                                       | 27808   Wing phenotype   |  | 27808  Lethal                                                                                                                                                                                                               |  |



|        |        |         |                                                                                                    |        |                                                                                                  |        |                                                                                                             |
|--------|--------|---------|----------------------------------------------------------------------------------------------------|--------|--------------------------------------------------------------------------------------------------|--------|-------------------------------------------------------------------------------------------------------------|
| CG7028 | PRP4   | 107042  |  Wing phenotype   |        |                                                                                                  | 107042 |  Wing phenotype/Lethal   |
| CG7069 |        | 101116  |                                                                                                    |        |                                                                                                  |        |                                                                                                             |
| CG7070 | PyK    | 27834   |                                                                                                    |        |                                                                                                  |        |                                                                                                             |
| CG7094 |        | 49533   |                                                                                                    |        |                                                                                                  |        |                                                                                                             |
| CG7097 | hppy   | 35165   | Wing phenotype                                                                                     |        |                                                                                                  |        |                                                                                                             |
| CG7103 | Pvf1   | 27843   |                                                                                                    |        |                                                                                                  |        |                                                                                                             |
| CG7125 | PKD    | 108273  |                                                                                                    |        |                                                                                                  |        |                                                                                                             |
| CG7156 |        | 103580  |                                                                                                    |        |                                                                                                  |        |                                                                                                             |
|        |        | 35166   |                                                                                                    |        |                                                                                                  |        |                                                                                                             |
|        |        | 6175    |                                                                                                    |        |                                                                                                  |        |                                                                                                             |
|        |        | 102699  |                                                                                                    |        |                                                                                                  |        |                                                                                                             |
|        |        | 22344   | Wing phenotype                                                                                     |        |                                                                                                  |        |                                                                                                             |
|        |        | 106255  | Wing phenotype                                                                                     |        |                                                                                                  |        |                                                                                                             |
|        |        | 26035   |                                                                                                    |        |                                                                                                  |        |                                                                                                             |
|        |        | 26036   |                                                                                                    |        |                                                                                                  |        |                                                                                                             |
| CG7177 | Wnk    | 35193   |                                                                                                    | 35193  |  Wing phenotype | 35193  |                                                                                                             |
|        |        | 35194   |                                                                                                    | 35194  |  Wing phenotype | 35194  | Wing phenotype                                                                                              |
|        |        | 106928  |  Wing phenotype   | 106928 |  Wing phenotype | 106928 | Wing phenotype                                                                                              |
|        |        |         |                                                                                                    |        |                                                                                                  |        |                                                                                                             |
| CG7186 | SAK    | 27904   |                                                                                                    |        |                                                                                                  |        |                                                                                                             |
| CG7207 | cert   | 105102  |                                                                                                    |        |                                                                                                  |        |                                                                                                             |
| CG7223 | htl    | 103563  |                                                                                                    |        |                                                                                                  |        |                                                                                                             |
| CG7236 |        | 27914   |                                                                                                    |        |                                                                                                  |        |                                                                                                             |
| CG7281 | CycC   | 27180   |                                                                                                    |        |                                                                                                  |        |                                                                                                             |
| CG7328 |        | 6692    |                                                                                                    |        |                                                                                                  |        |                                                                                                             |
| CG7335 |        | 27505   |                                                                                                    |        |                                                                                                  |        |                                                                                                             |
| CG7362 |        | 27937   | Wing phenotype                                                                                     |        |                                                                                                  |        |                                                                                                             |
| CG7393 | p38b   | 48834   | Wing phenotype                                                                                     |        |                                                                                                  |        |                                                                                                             |
| CG7405 | CycH   | 110610  |                                                                                                    |        |                                                                                                  |        |                                                                                                             |
| CG7470 |        | 27952   |                                                                                                    |        |                                                                                                  |        |                                                                                                             |
| CG7524 | Src64B | 7328R-1 |                                                                                                    |        |                                                                                                  |        |                                                                                                             |
| CG7525 | Tie    | 29035   |                                                                                                    |        |                                                                                                  |        |                                                                                                             |
| CG7551 |        | 100062  |                                                                                                    |        |                                                                                                  |        |                                                                                                             |
|        |        | 104218  |                                                                                                    |        |                                                                                                  |        |                                                                                                             |
|        |        | 7557    |                                                                                                    |        |                                                                                                  |        |                                                                                                             |
|        |        | 108099  |                                                                                                    |        |                                                                                                  |        |                                                                                                             |
|        |        | 7393R-3 |                                                                                                    |        |                                                                                                  |        |                                                                                                             |
|        |        | 10398   |                                                                                                    |        |                                                                                                  |        |                                                                                                             |
|        |        | 104312  | Wing phenotype                                                                                     |        |                                                                                                  |        |                                                                                                             |
|        |        | 101476  |                                                                                                    |        |                                                                                                  |        |                                                                                                             |
|        |        | 38955   |                                                                                                    |        |                                                                                                  |        |                                                                                                             |
|        |        | 35252   |                                                                                                    |        |                                                                                                  |        |                                                                                                             |
|        |        | 7524R-3 |                                                                                                    |        |                                                                                                  |        |                                                                                                             |
|        |        | 27087   |                                                                                                    |        |                                                                                                  |        |                                                                                                             |
|        |        | 26879   |                                                                                                    |        |                                                                                                  |        |                                                                                                             |
|        |        | 7551R-1 |                                                                                                    |        |                                                                                                  |        |                                                                                                             |
|        |        | 7551R-3 |                                                                                                    |        |                                                                                                  |        |                                                                                                             |
| CG7597 | Cdk12  | 25508   |  Lethal         | 34838  |  Lethal       | 25508  |  Wing phenotype/Lethal |
|        |        | 25510   |  Wing phenotype |        |                                                                                                  | 34838  |  Wing phenotype        |
|        |        |         |                                                                                                    |        |                                                                                                  | 25510  |  Lethal                |
| CG7616 |        | 41408   |                                                                                                    |        |                                                                                                  |        |                                                                                                             |
| CG7643 | ald    | 104663  |                                                                                                    |        |                                                                                                  |        |                                                                                                             |
| CG7693 | fray   | 110572  |                                                                                                    |        |                                                                                                  |        |                                                                                                             |
| CG7717 | Mekk1  | 7643R-3 | Wing phenotype                                                                                     |        |                                                                                                  |        |                                                                                                             |
| CG7719 | gwl    | 106919  |                                                                                                    |        |                                                                                                  |        |                                                                                                             |
| CG7766 |        | 41719   |                                                                                                    |        |                                                                                                  |        |                                                                                                             |
| CG7838 | BubR1  | 110339  |                                                                                                    |        |                                                                                                  |        |                                                                                                             |
|        |        | 25529   |                                                                                                    |        |                                                                                                  |        |                                                                                                             |
|        |        | 21046   |                                                                                                    |        |                                                                                                  |        |                                                                                                             |
|        |        | 7719R-1 | Wing phenotype                                                                                     |        |                                                                                                  |        |                                                                                                             |
|        |        | 52572   |                                                                                                    |        |                                                                                                  |        |                                                                                                             |
|        |        | 110184  | Wing phenotype                                                                                     |        |                                                                                                  |        |                                                                                                             |
|        |        | 26109   |                                                                                                    |        |                                                                                                  |        |                                                                                                             |
|        |        | 7838R-1 | Wing phenotype                                                                                     |        |                                                                                                  |        |                                                                                                             |

|        |          |                                       |                                  |                         |        |                |                             |
|--------|----------|---------------------------------------|----------------------------------|-------------------------|--------|----------------|-----------------------------|
| CG7873 | Src42A   | 26019<br>100708<br>3002               | Wing phenotype<br>Wing phenotype |                         |        |                |                             |
| CG7892 | nmo      | 101545<br>25793                       |                                  |                         |        |                |                             |
| CG7904 | put      | 37279<br>107071<br>7904R-2<br>7904R-3 | Lethal<br>Lethal<br>Lethal       |                         | 37279  | Wing phenotype | 37279<br>7904R-2<br>7904R-3 |
| CG7995 |          | 101869<br>22652                       |                                  |                         |        |                |                             |
| CG8049 | Btk29A   | 106962<br>22675                       |                                  |                         |        |                |                             |
| CG8057 | alc      | 104489<br>8057R-4                     |                                  |                         |        |                |                             |
| CG8094 | Hex-C    | 35338<br>35337                        |                                  |                         |        |                |                             |
| CG8173 |          | 35846                                 | Wing phenotype                   |                         |        |                |                             |
| CG8174 | SRPK     | 105661<br>26933<br>103416             | Wing phenotype                   |                         |        |                |                             |
| CG8201 | par-1    | 52553<br>52556<br>32410               | Wing phenotype                   | 52553<br>52556<br>32410 | Lethal | 52556          | Wing phenotype              |
| CG8203 | Cdk5     | 104491<br>35856                       |                                  |                         |        |                |                             |
| CG8222 | Pvr      | 43459<br>105353                       |                                  |                         |        |                |                             |
| CG8224 | babo     | 3825<br>106092                        | Wing phenotype                   |                         |        |                |                             |
| CG8239 |          | 24254<br>107034                       |                                  |                         |        |                |                             |
| CG8250 | Alk      | 107083<br>11446                       |                                  |                         |        |                |                             |
| CG8286 | P58IPK   | 109649<br>14154<br>43541              |                                  |                         |        |                |                             |
| CG8298 |          | 43539<br>8298R-3                      |                                  |                         |        |                |                             |
| CG8351 | Tcp-1η   | 108585<br>28895                       | Wing phenotype                   |                         |        |                |                             |
| CG8362 | nmdyn-D7 | 35903<br>105161                       |                                  |                         |        |                |                             |
| CG8363 | Papss    | 35904<br>110544                       |                                  |                         |        |                |                             |
| CG8475 |          | 2801<br>110591                        | Wing phenotype                   |                         |        |                |                             |
| CG8485 |          | 35939<br>35940                        | Wing phenotype                   | 35940                   |        | 35939          | Wing phenotype              |
| CG8565 |          | 100449<br>8565R-2                     |                                  |                         |        |                |                             |
| CG8637 | trc      | 35988<br>107923                       | Wing phenotype<br>Wing phenotype |                         |        |                |                             |
| CG8657 | Dgkε     | 4659<br>8657R-2                       | Wing phenotype                   |                         |        |                |                             |
| CG8726 |          | 109451<br>40719                       |                                  |                         |        |                |                             |
| CG8767 | mos      | 110435<br>43526                       |                                  |                         |        |                |                             |
| CG8789 | wnd      | 103410<br>26910                       |                                  |                         |        |                |                             |
| CG8808 | Pdk      | 106641<br>37968                       |                                  |                         |        |                |                             |
| CG8866 |          | 103725                                |                                  |                         |        |                |                             |

|        |        |                                     |                                  |                                                       |        |                                                     |
|--------|--------|-------------------------------------|----------------------------------|-------------------------------------------------------|--------|-----------------------------------------------------|
| CG8874 | Fps85D | 44859<br>36053<br>107266            |                                  |                                                       |        |                                                     |
| CG8878 |        | 28971<br>100985                     | Wing phenotype<br>Wing phenotype |                                                       | 100985 | 28971<br>100985<br>Wing phenotype<br>Wing phenotype |
| CG8914 | CK11β2 | 102633<br>26915                     |                                  |                                                       |        |                                                     |
| CG8948 | Graf   | 42165<br>42166                      |                                  |                                                       |        |                                                     |
| CG8967 | otk    | 42566<br>30834<br>104688<br>8967R-2 |                                  | 42566<br>30834<br>104688<br>8967R-2<br>Wing phenotype | 104688 | 30834<br>104688<br>Wing phenotype                   |
| CG9096 | CycD   | 29024<br>105361                     |                                  |                                                       |        |                                                     |
| CG9222 |        | 104259<br>27010                     |                                  |                                                       |        |                                                     |
| CG9326 | vari   | 104548<br>24157                     | Wing phenotype                   |                                                       |        |                                                     |
| CG9358 | Phk-3  | 106938<br>49008                     |                                  |                                                       |        |                                                     |
| CG9374 | lkb1   | 34362<br>108356                     | Wing phenotype                   |                                                       |        |                                                     |
| CG9541 |        | 49212<br>102912                     |                                  |                                                       |        |                                                     |
| CG9738 | Mkk4   | 108561<br>26929                     |                                  |                                                       |        |                                                     |
| CG9746 | ird1   | 9746R-1<br>110706                   | Wing phenotype<br>Wing phenotype |                                                       |        |                                                     |
| CG9774 | rok    | 3793<br>104675                      | Wing phenotype<br>Wing phenotype |                                                       |        |                                                     |
| CG9961 |        | 101702<br>36176                     |                                  |                                                       |        |                                                     |
| CG9962 |        | 108721<br>36473                     |                                  |                                                       |        |                                                     |
| CG9985 | sktl   | 6229<br>101624                      | Wing phenotype<br>Wing phenotype |                                                       |        |                                                     |

Weak-Medium Decrease -0.2 to -0.5  
 Medium-Strong Decrease > -0.5  
 Weak-Medium Increase +0.2 to +0.5  
 Medium-Strong Increase > +0.5  
 No change

Transgenic RNAi Project strains are in blue font  
 National Institute of Genetics strains have the letter R in the stock number  
 All other strains are from Vienna Drosophila RNAi Center

Fig. S5

**Phosphatase Data**

Weak-Medium Decrease -0.2 to -0.5  
 Medium-Strong Decrease > -0.5  
 Weak-Medium Increase +0.2 to +0.5  
 Medium-Strong Increase > +0.5  
 No change

Wing phenotype any visible wing phenotype including notches, blisters, vein spacing, altered size  
 Lethal No adults recovered

| Drosophila Phosphatase |             |                                                   | PRIMARY SCREEN |                    |      |                |            |                  | SECONDARY SCREEN |        |            |                  |      |       | HEDGEHOG SCREEN                         |            |                      |    |       |
|------------------------|-------------|---------------------------------------------------|----------------|--------------------|------|----------------|------------|------------------|------------------|--------|------------|------------------|------|-------|-----------------------------------------|------------|----------------------|----|-------|
| Annotation Symbol      | Gene Symbol | Gene Name                                         | RNAi Stock     | UAS-dcr2;;dpp-Gal4 |      |                | RNAi Stock | UAS-dcr2;hh-Gal4 |                  |        | RNAi Stock | UAS-dcr2;C5-Gal4 |      |       | UAS-dcr2; dpp-Gal4 or UAS-dcr2; hh-Gal4 | RNAi Stock | MS1096-Gal4;UAS-dcr2 |    |       |
|                        |             |                                                   |                | Wing disc          |      | Adult          |            | Wing disc        |                  | Adult  |            | Wing disc        |      | Adult |                                         |            | Wing disc            |    | Adult |
|                        |             |                                                   |                | Wg                 | Sens | Dll            |            | Wg               | Sens             | Dll    |            | Wg               | Sens | Dll   |                                         |            | Cut                  | Ci | Ptc   |
| CG10089                |             |                                                   | 17991          |                    |      |                |            |                  |                  |        |            |                  |      |       |                                         |            |                      |    |       |
|                        |             |                                                   | 108744         |                    |      |                |            |                  |                  |        |            |                  |      |       |                                         |            |                      |    |       |
| CG10138                | PpD5        | Protein phosphatase D5                            | 18016          |                    |      | Wing phenotype |            |                  |                  |        |            |                  |      |       |                                         |            |                      |    |       |
|                        |             |                                                   | 104452         |                    |      | Wing phenotype |            |                  |                  |        |            |                  |      |       |                                         |            |                      |    |       |
| CG10371                | Plip        | PTEN-like phosphatase                             | 47624          |                    |      | Wing phenotype |            |                  |                  |        |            |                  |      |       |                                         |            |                      |    |       |
|                        |             |                                                   | 104774         |                    |      | Wing phenotype |            |                  |                  |        |            |                  |      |       |                                         |            |                      |    |       |
| CG10376                |             |                                                   | 101335         |                    |      | Wing phenotype |            |                  |                  |        |            |                  |      |       |                                         |            |                      |    |       |
|                        |             |                                                   | 35475          |                    |      | Wing phenotype |            |                  |                  |        |            |                  |      |       |                                         |            |                      |    |       |
| CG10417                |             |                                                   | 27259          |                    |      |                |            |                  |                  |        |            |                  |      |       |                                         |            |                      |    |       |
|                        |             |                                                   | 106180         |                    |      |                |            |                  |                  |        |            |                  |      |       |                                         |            |                      |    |       |
| CG10426                |             |                                                   | 16048          |                    |      |                |            |                  |                  |        |            |                  |      |       |                                         |            |                      |    |       |
|                        |             |                                                   | 34037          |                    |      |                |            |                  |                  |        |            |                  |      |       |                                         |            |                      |    |       |
| CG10443                | Lar         | Leukocyte-antigen-related-like                    | 107996         |                    |      |                |            |                  |                  |        |            |                  |      |       |                                         |            |                      |    |       |
|                        |             |                                                   | 36270          |                    |      |                |            |                  |                  |        |            |                  |      |       |                                         |            |                      |    |       |
|                        |             |                                                   | 36269          |                    |      |                |            |                  |                  |        |            |                  |      |       |                                         |            |                      |    |       |
| CG10493                | Phlpp       | PH domain leucine-rich repeat protein phosphatase | 110360         |                    |      |                |            |                  |                  |        |            |                  |      |       |                                         |            |                      |    |       |
|                        |             |                                                   | 45365          |                    |      |                |            |                  |                  |        |            |                  |      |       |                                         |            |                      |    |       |
| CG10574                | I-2         | Inhibitor-2                                       | 101547         |                    |      | Wing phenotype |            |                  |                  | 101547 |            |                  |      |       | 101547                                  |            | Wing phenotype       |    |       |
|                        |             |                                                   | 39054          |                    |      | Wing phenotype |            |                  |                  |        |            |                  |      |       | 39054                                   |            | Wing phenotype       |    |       |
| CG10592                |             |                                                   | 104767         |                    |      |                |            |                  |                  |        |            |                  |      |       |                                         |            |                      |    |       |
|                        |             |                                                   | 38171          |                    |      |                |            |                  |                  |        |            |                  |      |       |                                         |            |                      |    |       |
| CG10827                |             |                                                   | 30822          |                    |      |                |            |                  |                  |        |            |                  |      |       |                                         |            |                      |    |       |
|                        |             |                                                   | 100073         |                    |      |                |            |                  |                  |        |            |                  |      |       |                                         |            |                      |    |       |
| CG10930                | PpY-55A     | Protein phosphatase Y at 55A Protein              | 102021         |                    |      |                |            |                  |                  |        |            |                  |      |       |                                         |            |                      |    |       |
|                        |             |                                                   | 16096          |                    |      |                |            |                  |                  |        |            |                  |      |       |                                         |            |                      |    |       |
| CG10975                | Ptp69D      | tyrosine phosphatase 69D                          | 104761         |                    |      |                |            |                  |                  |        |            |                  |      |       |                                         |            |                      |    |       |
|                        |             |                                                   | 40631          |                    |      |                |            |                  |                  |        |            |                  |      |       |                                         |            |                      |    |       |
| CG11217                | CanB2       | Calcineurin B2                                    | 104370         |                    |      |                |            |                  |                  |        |            |                  |      |       |                                         |            |                      |    |       |
|                        |             |                                                   | 28762          |                    |      |                |            |                  |                  |        |            |                  |      |       |                                         |            |                      |    |       |
| CG11425                |             |                                                   | 103037         |                    |      |                |            |                  |                  |        |            |                  |      |       |                                         |            |                      |    |       |
|                        |             |                                                   | 8458           |                    |      |                |            |                  |                  |        |            |                  |      |       |                                         |            |                      |    |       |
| CG11426                |             |                                                   | 42599          |                    |      |                |            |                  |                  |        |            |                  |      |       |                                         |            |                      |    |       |
|                        |             |                                                   | 42600          |                    |      |                |            |                  |                  |        |            |                  |      |       |                                         |            |                      |    |       |
| CG11437                |             |                                                   | 9452           |                    |      | Wing phenotype |            |                  |                  |        |            |                  |      |       |                                         |            |                      |    |       |

|         |         |                                    |                                      |                                  |                 |                          |                 |                                  |                                  |
|---------|---------|------------------------------------|--------------------------------------|----------------------------------|-----------------|--------------------------|-----------------|----------------------------------|----------------------------------|
| CG11437 |         |                                    | 31721                                |                                  |                 |                          |                 |                                  |                                  |
| CG11438 |         |                                    | 11438R-3<br>11438R-2                 |                                  |                 |                          |                 |                                  |                                  |
| CG11440 | laza    | lazaro                             | 42594<br>109898                      |                                  |                 |                          |                 |                                  |                                  |
| CG11516 | Ptp99A  | Protein tyrosine phosphatase 99A   | 103457<br>27208                      |                                  |                 |                          |                 |                                  |                                  |
| CG11597 |         |                                    | 38540<br>104729                      |                                  |                 |                          |                 |                                  |                                  |
| CG11883 |         |                                    | 106744<br>38590                      | Wing phenotype                   | 106744<br>38590 | Wing phenotype           | 38590           | 106744<br>38590                  | Wing phenotype<br>Wing phenotype |
| CG12034 |         |                                    | 107062<br>12034R-1                   |                                  |                 |                          |                 |                                  |                                  |
| CG12078 |         |                                    | 101274<br>15288                      |                                  |                 |                          |                 |                                  |                                  |
| CG12091 |         |                                    | 100800<br>13987                      |                                  |                 |                          |                 |                                  |                                  |
| CG12151 | Pdp     | Pyruvate dehydrogenase phosphatase | 31661                                |                                  |                 |                          |                 |                                  |                                  |
| CG12169 | Ppm1    | Ppm1                               | 107271<br>38631                      |                                  |                 |                          |                 |                                  |                                  |
| CG12173 |         |                                    | 101257<br>31676<br>31674             |                                  |                 |                          |                 |                                  |                                  |
| CG12217 | PpV     | Protein phosphatase V              | 101997<br>31690                      | Wing phenotype<br>Wing phenotype |                 |                          | 101997<br>31690 | Wing phenotype<br>Wing phenotype |                                  |
| CG12252 | Fcp1    |                                    | 38640<br>106253                      | Wing phenotype<br>Wing phenotype |                 |                          | 38640<br>106253 | Lethal<br>Wing phenotype         |                                  |
| CG1228  | Ptpmeg  | Ptpmeg                             | 38652                                |                                  |                 |                          |                 |                                  |                                  |
| CG12538 |         |                                    | 103740<br>102895                     |                                  |                 |                          |                 |                                  |                                  |
| CG12746 |         |                                    | 31957<br>104989                      |                                  |                 |                          |                 |                                  |                                  |
| CG13125 | TbCMF46 | TbCMF47                            | 33314<br>17123                       |                                  |                 |                          |                 |                                  |                                  |
| CG13197 |         |                                    | 36423<br>105122                      | Wing phenotype                   |                 |                          |                 |                                  |                                  |
| CG13311 |         |                                    | 51574<br>101655                      | Wing phenotype                   |                 |                          |                 |                                  |                                  |
| CG13570 | spag    | spaghetti                          | 103353<br>23895                      |                                  |                 |                          |                 |                                  |                                  |
| CG1395  | stg     | string                             | 17760<br>1395R-1<br>1395R-2<br>34831 | Wing phenotype                   | 17760<br>34831  | Wing phenotype<br>Lethal | 17760<br>34831  | Wing phenotype<br>Wing phenotype |                                  |
| CG14022 |         | Mitogen-activated                  | 110777<br>31795<br>45415             |                                  |                 |                          |                 |                                  |                                  |

|         |           |                                           |                       |                                                                                   |                |        |                                                                                     |
|---------|-----------|-------------------------------------------|-----------------------|-----------------------------------------------------------------------------------|----------------|--------|-------------------------------------------------------------------------------------|
| CG14080 | Mkp3      | acuvateo<br>protein kinase<br>phosphatase | 23911                 |                                                                                   |                |        |                                                                                     |
|         |           |                                           | 104884                | 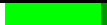 | Wing phenotype | 104884 |  |
| CG14211 | MKP-4     | MAPK<br>Phosphatase<br>4                  | 3146                  |  | Lethal         |        |                                                                                     |
|         |           |                                           | 3147                  |  | Wing phenotype |        |                                                                                     |
|         |           |                                           | 14211R-4              |                                                                                   |                | 104884 |  |
|         |           |                                           |                       |                                                                                   |                | 3147   |  |
| CG14297 |           |                                           | 102071                |                                                                                   |                |        |                                                                                     |
|         |           |                                           | 14297R-4              |                                                                                   |                |        |                                                                                     |
| CG14411 |           |                                           | 17579                 |                                                                                   |                |        |                                                                                     |
|         |           |                                           | 109622                |                                                                                   | Wing phenotype |        |                                                                                     |
| CG1455  | CanA1     | Calcineurin A1                            | 32283                 |                                                                                   |                |        |                                                                                     |
|         |           |                                           | 32284                 |                                                                                   |                |        |                                                                                     |
| CG14616 | I(1)G0196 | lethal (1)<br>G0196                       | 106973                |                                                                                   |                |        |                                                                                     |
|         |           | Alkaline                                  |                       |                                                                                   |                |        |                                                                                     |
| CG1462  | Aph-4     | phosphatase<br>4                          | 6862                  |                                                                                   |                |        |                                                                                     |
|         |           |                                           | 110043                |                                                                                   |                |        |                                                                                     |
| CG14719 | It        | inhibitor-t                               | 105565                |                                                                                   |                |        |                                                                                     |
|         |           |                                           | 32314                 |                                                                                   |                |        |                                                                                     |
| CG14903 |           |                                           | 49108                 |                                                                                   |                |        |                                                                                     |
|         |           |                                           | 105752                |                                                                                   |                |        |                                                                                     |
| CG15035 |           |                                           | 100241                |                                                                                   |                |        |                                                                                     |
|         |           |                                           | 32353                 |                                                                                   |                |        |                                                                                     |
| CG15385 |           |                                           | 51859                 |                                                                                   |                |        |                                                                                     |
|         |           |                                           | 110458                |                                                                                   |                |        |                                                                                     |
| CG15400 |           |                                           | 7261                  |                                                                                   |                |        |                                                                                     |
|         |           |                                           | 15400R-2              |                                                                                   |                |        |                                                                                     |
| CG15528 |           |                                           | 14865                 |                                                                                   |                |        |                                                                                     |
|         |           |                                           | 105484                |                                                                                   |                |        |                                                                                     |
| CG15533 |           |                                           | 42520                 |                                                                                   |                |        |                                                                                     |
|         |           |                                           | 102842                |                                                                                   |                |        |                                                                                     |
| CG15534 |           |                                           | 108181                |                                                                                   |                |        |                                                                                     |
|         |           |                                           | 30187                 |                                                                                   |                |        |                                                                                     |
| CG15743 |           |                                           | 42686                 |                                                                                   | Wing phenotype |        |                                                                                     |
|         |           |                                           | 42685                 |                                                                                   |                |        |                                                                                     |
| CG1637  |           |                                           | 101368                |                                                                                   | Wing phenotype |        |                                                                                     |
|         |           |                                           | <a href="#">33733</a> |                                                                                   |                |        |                                                                                     |
| CG16717 |           |                                           | 29199                 |                                                                                   |                |        |                                                                                     |
|         |           |                                           | 105831                |                                                                                   |                |        |                                                                                     |
| CG16757 | Spn       | Spinophilin                               | 19658                 |                                                                                   |                |        |                                                                                     |
|         |           |                                           | 105888                |                                                                                   |                |        |                                                                                     |
| CG16771 |           |                                           | 6386                  |                                                                                   |                |        |                                                                                     |
|         |           |                                           | 16771R-2              |                                                                                   |                |        |                                                                                     |
| CG16870 | Acyp      | Acylphosphatase<br>meiotic                | 16870R-2              |                                                                                   |                |        |                                                                                     |
|         |           |                                           | 16870R-1              |                                                                                   |                |        |                                                                                     |
| CG16928 | mre11     | recombination<br>11                       | 30474                 |                                                                                   |                |        |                                                                                     |
|         |           |                                           | 30476                 |                                                                                   |                |        |                                                                                     |
| CG1696  | Dd        | Dullard                                   | 104785                |                                                                                   |                |        |                                                                                     |
|         |           |                                           | 12941                 |                                                                                   |                |        |                                                                                     |
| CG17026 |           |                                           | 32813                 |                                                                                   |                |        |                                                                                     |
|         |           |                                           | 49199                 |                                                                                   |                |        |                                                                                     |
| CG17027 |           |                                           | 103270                |                                                                                   |                |        |                                                                                     |

|         |          |                                                            |          |                                                                                     |                |          |                                                                                                                                                                         |                                                                                                                                                                             |                                                                                                    |                                                                                                                                                                             |                                                                                       |                                                                                       |                |
|---------|----------|------------------------------------------------------------|----------|-------------------------------------------------------------------------------------|----------------|----------|-------------------------------------------------------------------------------------------------------------------------------------------------------------------------|-----------------------------------------------------------------------------------------------------------------------------------------------------------------------------|----------------------------------------------------------------------------------------------------|-----------------------------------------------------------------------------------------------------------------------------------------------------------------------------|---------------------------------------------------------------------------------------|---------------------------------------------------------------------------------------|----------------|
| CG17027 |          |                                                            | 50075    |                                                                                     |                |          |                                                                                                                                                                         |                                                                                                                                                                             |                                                                                                    |                                                                                                                                                                             |                                                                                       |                                                                                       |                |
| CG17028 |          |                                                            | 100100   |                                                                                     |                |          |                                                                                                                                                                         |                                                                                                                                                                             |                                                                                                    |                                                                                                                                                                             |                                                                                       |                                                                                       |                |
|         |          |                                                            | 32819    |                                                                                     |                |          |                                                                                                                                                                         |                                                                                                                                                                             |                                                                                                    |                                                                                                                                                                             |                                                                                       |                                                                                       |                |
| CG17029 |          |                                                            | 32823    |                                                                                     |                |          |                                                                                                                                                                         |                                                                                                                                                                             |                                                                                                    |                                                                                                                                                                             |                                                                                       |                                                                                       |                |
|         |          |                                                            | 49565    |                                                                                     |                |          |                                                                                                                                                                         |                                                                                                                                                                             |                                                                                                    |                                                                                                                                                                             |                                                                                       |                                                                                       |                |
| CG17124 |          |                                                            | 19078    |                                                                                     |                |          |                                                                                                                                                                         |                                                                                                                                                                             |                                                                                                    |                                                                                                                                                                             |                                                                                       |                                                                                       |                |
|         |          |                                                            | 17124R-3 |                                                                                     |                |          |                                                                                                                                                                         |                                                                                                                                                                             |                                                                                                    |                                                                                                                                                                             |                                                                                       |                                                                                       |                |
| CG17291 | Pp2A-29B | Protein phosphatase 2A at 29B                              | 49672    |    | Lethal         |          | 49672                                                                                                                                                                   |       | Wing phenotype  | 49672                                                                                                                                                                       |    | Lethal                                                                                |                |
|         |          |                                                            | 23886    |    | Wing phenotype |          |                                                                                                                                                                         |                                                                                                                                                                             |                                                                                                    | 23886                                                                                                                                                                       |    | Wing phenotype                                                                        |                |
| CG17598 |          |                                                            | 32956    |                                                                                     | Wing phenotype |          |                                                                                                                                                                         |                                                                                                                                                                             |                                                                                                    |                                                                                                                                                                             |                                                                                       |                                                                                       |                |
|         |          |                                                            | 32955    |                                                                                     |                |          |                                                                                                                                                                         |                                                                                                                                                                             |                                                                                                    |                                                                                                                                                                             |                                                                                       |                                                                                       |                |
| CG17746 |          |                                                            | 100178   |                                                                                     |                |          |                                                                                                                                                                         |                                                                                                                                                                             |                                                                                                    |                                                                                                                                                                             |                                                                                       |                                                                                       |                |
|         |          |                                                            | 40102    |                                                                                     |                |          |                                                                                                                                                                         |                                                                                                                                                                             |                                                                                                    |                                                                                                                                                                             |                                                                                       |                                                                                       |                |
| CG1809  |          |                                                            | 43231    |                                                                                     |                |          |                                                                                                                                                                         |                                                                                                                                                                             |                                                                                                    |                                                                                                                                                                             |                                                                                       |                                                                                       |                |
|         |          |                                                            | 1809R-1  |                                                                                     |                |          |                                                                                                                                                                         |                                                                                                                                                                             |                                                                                                    |                                                                                                                                                                             |                                                                                       |                                                                                       |                |
| CG1810  | mRNA-cap | mRNA-capping enzyme                                        | 108809   |    | Wing phenotype |          | 108809                                                                                                                                                                  |       | Wing phenotype  | 108809                                                                                                                                                                      |    | Wing phenotype/<br>Lethal                                                             |                |
|         |          |                                                            | 32847    |                                                                                     | Wing phenotype | 32847    |                                                                                        | Lethal                                                                                                                                                                      |                                                                                                    | 32847                                                                                                                                                                       |    | Wing phenotype                                                                        |                |
| CG1817  | Ptp10D   | Protein tyrosine phosphatase 10D                           | 1102     |                                                                                     |                |          |                                                                                                                                                                         |                                                                                                                                                                             |                                                                                                    |                                                                                                                                                                             |                                                                                       |                                                                                       |                |
|         |          |                                                            | 8010     |                                                                                     |                |          |                                                                                                                                                                         |                                                                                                                                                                             |                                                                                                    |                                                                                                                                                                             |                                                                                       |                                                                                       |                |
| CG18243 | Ptp52F   | Ptp52F                                                     | 39175    |                                                                                     |                |          |                                                                                                                                                                         |                                                                                                                                                                             |                                                                                                    |                                                                                                                                                                             |                                                                                       |                                                                                       |                |
|         |          |                                                            | 3116     |                                                                                     |                |          |                                                                                                                                                                         |                                                                                                                                                                             |                                                                                                    |                                                                                                                                                                             |                                                                                       |                                                                                       |                |
| CG1906  | alph     | alphabet                                                   | 105483   |                                                                                     |                |          |                                                                                                                                                                         |                                                                                                                                                                             |                                                                                                    |                                                                                                                                                                             |                                                                                       |                                                                                       |                |
|         |          |                                                            | 32476    |                                                                                     |                |          |                                                                                                                                                                         |                                                                                                                                                                             |                                                                                                    |                                                                                                                                                                             |                                                                                       |                                                                                       |                |
| CG2096  | flw      | flapwing                                                   | 29622    |    | Wing phenotype | 29622    |                                                                                        |                                                                                                                                                                             |                                                                                                    | 29622                                                                                                                                                                       |    |                                                                                       |                |
|         |          |                                                            | 104677   |                                                                                     | Wing phenotype | 104677   |   | Wing phenotype                                                                           |                                                                                                    | 104677                                                                                                                                                                      |    | Wing phenotype                                                                        |                |
|         |          |                                                            | 15305R-1 |                                                                                     |                | 15305R-1 |                                                                                        |                                                                                                                                                                             |                                                                                                    |                                                                                                                                                                             |                                                                                       |                                                                                       |                |
| CG2104  |          |                                                            | 30018    |                                                                                     |                |          |                                                                                                                                                                         |                                                                                                                                                                             |                                                                                                    |                                                                                                                                                                             |                                                                                       |                                                                                       |                |
|         |          |                                                            | 100216   |                                                                                     |                |          |                                                                                                                                                                         |                                                                                                                                                                             |                                                                                                    |                                                                                                                                                                             |                                                                                       |                                                                                       |                |
| CG2890  | PPP4R2r  | Protein phosphatase 4 regulatory subunit 2-related protein | 105399   |   | Wing phenotype |          |                                                                                                                                                                         |                                                                                                                                                                             |                                                                                                    | 105399                                                                                                                                                                      |   | Wing phenotype                                                                        |                |
|         |          |                                                            | 25445    |                                                                                     | Wing phenotype |          | 25445                                                                                                                                                                   |   |                                                                                                    | 25445                                                                                                                                                                       |  | Wing phenotype/<br>Lethal                                                             |                |
| CG2984  | Pp2C1    | Protein phosphatase 2C                                     | 105249   |                                                                                     |                | 105249   |                                                                                      | Wing phenotype                                                                                                                                                              | 105249                                                                                             |   | 105249                                                                                |  | Wing phenotype |
|         |          |                                                            | 2984R-4  |  |                |          | 2984R-3                                                                                                                                                                 | Wing phenotype                                                                                                                                                              |                                                                                                    | 2984R-4                                                                                                                                                                     |  | Wing phenotype                                                                        |                |
| CG30103 |          |                                                            | 105458   |                                                                                     |                |          |                                                                                                                                                                         |                                                                                                                                                                             |                                                                                                    |                                                                                                                                                                             |                                                                                       |                                                                                       |                |
|         |          |                                                            | 4950     |                                                                                     |                |          |                                                                                                                                                                         |                                                                                                                                                                             |                                                                                                    |                                                                                                                                                                             |                                                                                       |                                                                                       |                |
| CG30104 |          |                                                            | 10051    |                                                                                     |                |          |                                                                                                                                                                         |                                                                                                                                                                             |                                                                                                    |                                                                                                                                                                             |                                                                                       |                                                                                       |                |
|         |          |                                                            | 106640   |                                                                                     |                |          |                                                                                                                                                                         |                                                                                                                                                                             |                                                                                                    |                                                                                                                                                                             |                                                                                       |                                                                                       |                |
| CG3028  | lpp      | Inositol polyphosphate 1-phosphatase                       | 110775   |                                                                                     |                |          |                                                                                                                                                                         |                                                                                                                                                                             |                                                                                                    |                                                                                                                                                                             |                                                                                       |                                                                                       |                |
|         |          |                                                            | 25615    |                                                                                     |                |          |                                                                                                                                                                         |                                                                                                                                                                             |                                                                                                    |                                                                                                                                                                             |                                                                                       |                                                                                       |                |
| CG3059  | NTPase   | NTPase                                                     | 110510   |                                                                                     |                |          |                                                                                                                                                                         |                                                                                                                                                                             |                                                                                                    |                                                                                                                                                                             |                                                                                       |                                                                                       |                |
|         |          |                                                            | 7265     |                                                                                     |                |          |                                                                                                                                                                         |                                                                                                                                                                             |                                                                                                    |                                                                                                                                                                             |                                                                                       |                                                                                       |                |
| CG31137 | twin     | twin                                                       | 13365    |                                                                                     |                |          |                                                                                                                                                                         |                                                                                                                                                                             |                                                                                                    |                                                                                                                                                                             |                                                                                       |                                                                                       |                |

|         |           |                                      |          |                                                                                     |                       |          |                                                                                     |                       |
|---------|-----------|--------------------------------------|----------|-------------------------------------------------------------------------------------|-----------------------|----------|-------------------------------------------------------------------------------------|-----------------------|
| CG31137 | twiii     | twiii                                | 104442   |                                                                                     |                       |          |                                                                                     |                       |
| CG31299 | cu        | curled                               | 45442    |                                                                                     |                       |          |                                                                                     |                       |
| CG31469 |           |                                      | 109759   |                                                                                     |                       |          |                                                                                     |                       |
| CG31692 | fbp       | fructose-1,6-bisphosphatase          | 102474   |                                                                                     |                       |          |                                                                                     |                       |
|         |           |                                      | 23397    |                                                                                     |                       |          |                                                                                     |                       |
|         |           |                                      | 108554   |                                                                                     |                       |          |                                                                                     |                       |
|         |           |                                      | 21396    |                                                                                     |                       |          |                                                                                     |                       |
| CG31717 |           |                                      | 7663     |    | Lethal                | 7663     |  | Wing phenotype        |
|         |           |                                      | 7662     |    | Wing phenotype/Lethal |          |                                                                                     | 7662                  |
|         |           |                                      | 105379   |                                                                                     |                       |          |                                                                                     | 105379                |
|         |           |                                      | 31717R-1 |                                                                                     |                       | 31717R-1 |                                                                                     | 31717R-1              |
|         |           |                                      |          |                                                                                     |                       |          |                                                                                     | 31717R-3              |
| CG31759 |           |                                      | 106772   |                                                                                     |                       |          |                                                                                     |                       |
| CG3178  | Rrp1      | Recombination repair protein 1       | 47321    |                                                                                     |                       |          |                                                                                     |                       |
| CG31795 | IA-2      | IA-2 ortholog                        | 108661   |                                                                                     |                       |          |                                                                                     |                       |
|         |           |                                      | 19819    |                                                                                     |                       |          |                                                                                     |                       |
|         |           |                                      | 7560     |                                                                                     |                       |          |                                                                                     |                       |
|         |           |                                      | 110595   |                                                                                     |                       |          |                                                                                     |                       |
| CG32156 | Mbs       | Myosin binding subunit Protein       | 105762   |    | Wing phenotype        | 105762   |  | Wing phenotype        |
|         |           |                                      | 32516    |    | Wing phenotype        |          |                                                                                     | 32516                 |
| CG3245  | PpN-58A   | Protein phosphatase N at 58A         | 41901    |                                                                                     |                       |          |                                                                                     |                       |
| CG32487 |           |                                      | 102060   |                                                                                     |                       |          |                                                                                     |                       |
| CG32488 |           |                                      | 26154    |                                                                                     |                       |          |                                                                                     |                       |
|         |           |                                      | 2077R-1  |                                                                                     |                       |          |                                                                                     |                       |
|         |           |                                      | 46570    |                                                                                     |                       |          |                                                                                     |                       |
|         |           |                                      | 100129   |                                                                                     |                       |          |                                                                                     |                       |
| CG32505 | Pp4-19C   | Protein phosphatase 19C              | 25317    |    | Wing phenotype        | 25317    |  | Lethal                |
|         |           |                                      | 27726    |    | Lethal                |          |                                                                                     | 27726                 |
|         |           |                                      |          |                                                                                     |                       |          |                                                                                     | Wing phenotype        |
| CG32568 |           |                                      | 103317   |                                                                                     |                       |          |                                                                                     |                       |
| CG3264  |           |                                      | 46651    |                                                                                     |                       |          |                                                                                     |                       |
|         |           |                                      | 43250    |                                                                                     |                       |          |                                                                                     |                       |
|         |           |                                      | 108783   |                                                                                     |                       |          |                                                                                     |                       |
| CG32697 | I(1)G0232 | lethal (1) G0232                     | 104427   |  |                       | 21276    |                                                                                     | 104427                |
|         |           |                                      | 21276    |                                                                                     |                       | 3101R-1  |  | 21276                 |
|         |           |                                      |          |                                                                                     |                       | 33744    |  |                       |
|         |           |                                      |          |                                                                                     |                       |          |                                                                                     | Wing phenotype        |
|         |           |                                      |          |                                                                                     |                       |          |                                                                                     | Wing phenotype        |
| CG32812 |           |                                      | 45397    |                                                                                     |                       |          |                                                                                     |                       |
| CG3289  | Ptpa      | Phosphotyrosyl phosphatase activator | 104081   |                                                                                     |                       |          |                                                                                     |                       |
| CG3290  |           |                                      | 41913    |                                                                                     |                       |          |                                                                                     |                       |
| CG3292  |           |                                      | 41912    |                                                                                     |                       |          |                                                                                     |                       |
|         |           |                                      | 104586   |                                                                                     |                       |          |                                                                                     |                       |
|         |           |                                      | 52378    |                                                                                     |                       |          |                                                                                     |                       |
|         |           |                                      | 19989    |                                                                                     |                       |          |                                                                                     |                       |
|         |           |                                      | 3292R-2  |                                                                                     |                       |          |                                                                                     |                       |
| CG33747 | primo-2   | primo-2                              | 23081    |  | Wing phenotype        | 23079    |  | 23081                 |
|         |           |                                      | 23079    |  | Wing phenotype        | 39004    |  | 23079                 |
|         |           |                                      | 39004    |                                                                                     |                       | 50642    |  | 39004                 |
|         |           |                                      |          |                                                                                     |                       |          |                                                                                     | Wing phenotype/Lethal |
|         |           |                                      |          |                                                                                     |                       |          |                                                                                     | Lethal                |



|         |         |                                               |        |                |        |                       |                |                |
|---------|---------|-----------------------------------------------|--------|----------------|--------|-----------------------|----------------|----------------|
| CG33748 | primo-1 | primo-1                                       |        |                |        |                       |                |                |
| CG3376  |         |                                               | 12226  |                |        |                       |                |                |
|         |         |                                               | 12227  |                |        |                       |                |                |
| CG34099 | Mkp     | MAP kinase-specific phosphatase               | 104374 |                |        |                       |                |                |
| CG34140 |         |                                               | 23452  | Wing phenotype |        |                       |                |                |
|         |         |                                               | 23454  |                |        |                       |                |                |
| CG3530  |         |                                               | 110786 |                | 110786 | Wing phenotype        |                | 110786         |
|         |         |                                               | 26217  |                |        |                       |                |                |
|         |         |                                               | 26216  | Wing phenotype | 26216  | Wing phenotype        | 26216          | Wing phenotype |
| CG3573  | Ocrl    | Oculocerebror enal syndrome of Lowe ortholog  | 34649  |                |        |                       |                |                |
|         |         |                                               | 110796 |                |        |                       |                |                |
| CG3632  |         |                                               | 110167 |                |        |                       |                |                |
|         |         |                                               | 26254  |                |        |                       |                |                |
| CG3705  | aay     | astray                                        | 23179  |                |        |                       |                |                |
|         |         |                                               | 110661 |                |        |                       |                |                |
| CG3954  | csw     | corkscrew                                     | 108352 | Wing phenotype |        |                       |                | 108352         |
|         |         |                                               | 21757  | Wing phenotype |        | 21757                 | Wing phenotype | 21757          |
| CG3980  | Cep97   |                                               | 34774  |                |        |                       |                |                |
| CG40448 | Pp1-Y2  | Pp1-Y2                                        | 103357 |                |        |                       |                |                |
|         |         | Multiple inositol polyphosphate phosphatase 1 | 109147 |                |        |                       |                |                |
| CG4123  | Mipp1   | polyphosphate phosphatase 1                   | 101634 |                |        |                       |                |                |
|         |         |                                               | 8493   |                |        |                       |                |                |
| CG41534 | Pp1-Y1  | Pp1-Y1                                        | 110123 |                |        |                       |                |                |
|         |         |                                               | 21607  |                |        |                       |                |                |
| CG4209  | CanB    | Calcineurin B                                 | 21611  |                |        |                       |                |                |
|         |         |                                               | 52390  |                |        |                       |                |                |
| CG42249 |         |                                               | 101200 |                |        |                       |                |                |
|         |         |                                               | 47397  |                |        |                       |                |                |
|         |         |                                               | 41672  |                |        |                       |                |                |
| CG42271 |         |                                               | 100176 | Wing phenotype |        |                       |                |                |
|         |         |                                               | 33768  | Wing phenotype | 33768  | Lethal                |                | 33768          |
|         |         |                                               | 33769  |                | 33769  | Lethal                |                |                |
| CG42283 | 5Ptasel | 5Ptasel                                       | 25030  |                |        |                       |                |                |
|         |         |                                               | 100802 | Wing phenotype | 100802 | Wing phenotype/Lethal |                | 100802         |
| CG42327 |         |                                               | 106630 |                |        |                       |                |                |
|         |         |                                               | 47455  |                |        |                       |                |                |
| CG4317  | Mipp2   | Multiple inositol polyphosphate phosphatase 2 | 14163  |                |        |                       |                |                |
|         |         |                                               | 108018 |                |        |                       |                |                |
| CG4733  | PR72    | PR72                                          | 107621 |                | 107621 |                       |                | 107621         |
|         |         |                                               | 34894  | Wing phenotype | 34894  | Wing phenotype        |                | 34894          |
| CG4827  | veil    | veil                                          | 49359  |                |        |                       |                |                |
|         |         |                                               | 100050 |                |        |                       |                |                |
|         |         |                                               | 46064  |                |        |                       |                |                |
| CG4965  | twe     | twine                                         | 104147 |                |        |                       |                |                |

|        |            |                                  |                                       |                                             |                            |                                             |        |                            |                                                    |                                  |
|--------|------------|----------------------------------|---------------------------------------|---------------------------------------------|----------------------------|---------------------------------------------|--------|----------------------------|----------------------------------------------------|----------------------------------|
| CG4993 | PRL-1      | PRL-2                            | 107836<br>45518<br>105674             |                                             |                            |                                             |        |                            |                                                    |                                  |
| CG5026 |            |                                  | 34916                                 |                                             |                            |                                             |        |                            |                                                    |                                  |
| CG5150 |            |                                  | 102646<br>15298                       |                                             |                            |                                             |        |                            |                                                    |                                  |
| CG5171 |            |                                  | 108686<br>5171R-3                     |                                             |                            |                                             |        |                            |                                                    |                                  |
| CG5177 |            |                                  | 27367<br>103024<br>5177R-1<br>5177R-2 | Wing phenotype                              |                            |                                             |        |                            |                                                    |                                  |
| CG5276 |            |                                  | 47995                                 |                                             |                            |                                             |        |                            |                                                    |                                  |
| CG5361 |            |                                  | 106691<br>51984<br>51985              | Wing phenotype                              |                            |                                             |        |                            |                                                    |                                  |
| CG5567 |            |                                  | 44319                                 |                                             |                            |                                             |        |                            |                                                    |                                  |
| CG5577 |            |                                  | 106981<br>22163<br>5577R-1            |                                             |                            |                                             |        |                            |                                                    |                                  |
| CG5643 | wdb        | widerborst                       | 27470<br>101406<br>5643R-3            |                                             | 27470<br>101406<br>5643R-3 | Wing phenotype<br>Wing phenotype/<br>Lethal | 101406 |                            | 27470<br>101406<br>5643R-3                         | Wing phenotype<br>Wing phenotype |
| CG5650 | Pp1-87B    | Protein phosphatase 1 at 87B     | 35024<br>35025<br>32414               | Wing phenotype/<br>Lethal<br>Wing phenotype |                            |                                             | 32414  | 35024<br>35025<br>32414    | Lethal<br>Lethal                                   |                                  |
| CG5656 |            |                                  | 110733<br>18119                       |                                             |                            |                                             |        |                            |                                                    |                                  |
| CG5671 | Pten       | Pten                             | 101475<br>35731                       | Wing phenotype                              |                            |                                             |        |                            |                                                    |                                  |
| CG5784 | Mapmodulin | Mapmodulin                       | 100283<br>49385                       |                                             |                            |                                             |        |                            |                                                    |                                  |
| CG5820 | Gp150      |                                  | 36301<br>100134                       | Wing phenotype<br>Wing phenotype            |                            |                                             | 36301  | 36301<br>100134            | Wing phenotype<br>Wing phenotype                   |                                  |
| CG5830 |            |                                  | 101539<br>5830R-2                     |                                             |                            |                                             |        |                            |                                                    |                                  |
| CG5851 | sds22      | sds22                            | 42051<br>5851R-1                      | Lethal<br>Wing phenotype/Lethal             |                            |                                             | 42051  | 42051<br>5851R-1           | Wing phenotype<br>Wing phenotype                   |                                  |
| CG6036 |            |                                  | 21023<br>105568                       |                                             |                            |                                             |        |                            |                                                    |                                  |
| CG6235 | tws        | twins                            | 104167<br>34340                       | Wing phenotype<br>Wing phenotype            |                            |                                             | 104167 | 104167<br>6235R-2<br>34340 | Wing phenotype<br>Wing phenotype<br>Wing phenotype |                                  |
| CG6238 | ssh        | slingshot                        | 107998<br>30136<br>29950<br>100121    | Wing phenotype                              |                            |                                             |        |                            |                                                    |                                  |
| CG6380 |            |                                  | 6542R-1<br>6542R-2                    | Wing phenotype                              |                            |                                             |        |                            |                                                    |                                  |
| CG6542 | EDTP       | Egg-derived tyrosine phosphatase |                                       |                                             |                            |                                             |        |                            |                                                    |                                  |
|        |            |                                  | 46070<br>34378                        |                                             | 46070<br>34378             |                                             |        | 34378                      | Wing phenotype                                     |                                  |

|        |          |                                                      |                                                                                                                                                                                           |                                                                                                          |                                                                                                                                                                                                                                                                                  |                                                                                                                                                                                                |
|--------|----------|------------------------------------------------------|-------------------------------------------------------------------------------------------------------------------------------------------------------------------------------------------|----------------------------------------------------------------------------------------------------------|----------------------------------------------------------------------------------------------------------------------------------------------------------------------------------------------------------------------------------------------------------------------------------|------------------------------------------------------------------------------------------------------------------------------------------------------------------------------------------------|
| CG6562 | synj     | synaptotjanin                                        | 6562R-1  Wing phenotype/<br>Lethal                                                                       | 27489                                                                                                    | 6562R-1  Wing phenotype                                                                                    | 6562R-1  Wing phenotype                                                                                     |
|        |          |                                                      | 6562R-2  Wing phenotype/<br>Lethal                                                                       |                                                                                                          |                                                                                                                                                                                                                                                                                  |                                                                                                                                                                                                |
| CG6571 | rdgC     | retinal degeneration C                               | 35105                                                                                                                                                                                     |                                                                                                          |                                                                                                                                                                                                                                                                                  |                                                                                                                                                                                                |
|        |          |                                                      | 6571R-2                                                                                                                                                                                   |                                                                                                          |                                                                                                                                                                                                                                                                                  |                                                                                                                                                                                                |
| CG6593 | Pp1α-96A | Protein phosphatase 1α at 96A                        | 27673  Lethal                                                                                            |                                                                                                          | 27673   Wing phenotype  | 27673  Lethal                                                                                               |
|        |          |                                                      | 105525  Lethal                                                                                           |                                                                                                          |                                                                                                                                                                                                                                                                                  | 105525  Lethal                                                                                              |
| CG6656 |          |                                                      | 104175                                                                                                                                                                                    |                                                                                                          |                                                                                                                                                                                                                                                                                  |                                                                                                                                                                                                |
|        |          |                                                      | 1633                                                                                                                                                                                      |                                                                                                          |                                                                                                                                                                                                                                                                                  |                                                                                                                                                                                                |
| CG6746 |          |                                                      | 46513                                                                                                                                                                                     | Wing phenotype                                                                                           |                                                                                                                                                                                                                                                                                  |                                                                                                                                                                                                |
|        |          |                                                      | 103625                                                                                                                                                                                    |                                                                                                          |                                                                                                                                                                                                                                                                                  |                                                                                                                                                                                                |
| CG6805 |          |                                                      | 107728                                                                                                                                                                                    |                                                                                                          |                                                                                                                                                                                                                                                                                  |                                                                                                                                                                                                |
|        |          |                                                      | <a href="#">34615</a>                                                                                                                                                                     |                                                                                                          |                                                                                                                                                                                                                                                                                  |                                                                                                                                                                                                |
| CG6896 | MYPT-75D | MYPT-75D                                             | 109909   Wing phenotype |                                                                                                          | 109909                  | 109909   Wing phenotype  |
|        |          |                                                      | 6896R-1  Wing phenotype                                                                                  |                                                                                                          |                                                                                                                                                                                                                                                                                  | 6896R-1   Wing phenotype |
|        |          |                                                      | <a href="#">34688</a>                                                                                                                                                                     |                                                                                                          |                                                                                                                                                                                                                                                                                  |                                                                                                                                                                                                |
| CG6899 | Ptp4E    | Protein tyrosine phosphatase 4E                      | 1012                                                                                                                                                                                      |                                                                                                          |                                                                                                                                                                                                                                                                                  |                                                                                                                                                                                                |
|        |          |                                                      | 27232                                                                                                                                                                                     |                                                                                                          |                                                                                                                                                                                                                                                                                  |                                                                                                                                                                                                |
| CG6939 | Sbf      | SET domain binding factor                            | 22317                                                                                                                                                                                     |                                                                                                          |                                                                                                                                                                                                                                                                                  |                                                                                                                                                                                                |
|        |          |                                                      | <a href="#">32419</a>                                                                                                                                                                     |                                                                                                          |                                                                                                                                                                                                                                                                                  |                                                                                                                                                                                                |
| CG7067 | NitFhit  | Nitrilase and fragile histidine triad fusion protein | 27831                                                                                                                                                                                     |                                                                                                          |                                                                                                                                                                                                                                                                                  |                                                                                                                                                                                                |
|        |          |                                                      | 108545                                                                                                                                                                                    |                                                                                                          |                                                                                                                                                                                                                                                                                  |                                                                                                                                                                                                |
| CG7109 | mts      | microtubule star                                     | 41924  Wing phenotype/<br>Lethal                                                                         | 41924  Wing phenotype  | 41924   Lethal          | 41924  Lethal                                                                                               |
|        |          |                                                      | 35171  Wing phenotype                                                                                    | 35171  Wing phenotype  |                                                                                                                                                                                                                                                                                  | 35171  Wing phenotype                                                                                       |
|        |          |                                                      | 35172                                                                                                                                                                                     |                                                                                                          |                                                                                                                                                                                                                                                                                  |                                                                                                                                                                                                |
| CG7115 |          |                                                      | 9404  Wing phenotype                                                                                     | 9404  Wing phenotype   | 9404                                                                                                       | 9404  Wing phenotype                                                                                        |
|        |          |                                                      | 103354  Wing phenotype                                                                                   | 103354  Wing phenotype |                                                                                                                                                                                                                                                                                  | 103354  Wing phenotype                                                                                      |
|        |          |                                                      | <a href="#">39065</a>                                                                                                                                                                     | <a href="#">39065</a>                                                                                    |                                                                                                                                                                                                                                                                                  | <a href="#">39065</a>                                                                                                                                                                          |
| CG7134 | cdc14    | cdc14                                                | 103627                                                                                                                                                                                    | Wing phenotype                                                                                           |                                                                                                                                                                                                                                                                                  |                                                                                                                                                                                                |
|        |          |                                                      | 7134R-6                                                                                                                                                                                   | Wing phenotype                                                                                           |                                                                                                                                                                                                                                                                                  |                                                                                                                                                                                                |
| CG7180 |          |                                                      | 102397                                                                                                                                                                                    |                                                                                                          |                                                                                                                                                                                                                                                                                  |                                                                                                                                                                                                |
|        |          |                                                      | 34369                                                                                                                                                                                     |                                                                                                          |                                                                                                                                                                                                                                                                                  |                                                                                                                                                                                                |
| CG7378 |          |                                                      | 106098                                                                                                                                                                                    |                                                                                                          |                                                                                                                                                                                                                                                                                  |                                                                                                                                                                                                |
|        |          |                                                      | 35226                                                                                                                                                                                     |                                                                                                          |                                                                                                                                                                                                                                                                                  |                                                                                                                                                                                                |
| CG7615 | fig      | fos intronic gene                                    | 47314                                                                                                                                                                                     |                                                                                                          |                                                                                                                                                                                                                                                                                  |                                                                                                                                                                                                |
|        |          |                                                      | 47312                                                                                                                                                                                     |                                                                                                          |                                                                                                                                                                                                                                                                                  |                                                                                                                                                                                                |
| CG7789 |          |                                                      |                                                                                                        |                                                                                                          |                                                                                                                                                                                                                                                                                  |                                                                                                                                                                                                |
| CG7850 | puc      | puckered                                             | 3019                                                                                                                                                                                      |                                                                                                          |                                                                                                                                                                                                                                                                                  |                                                                                                                                                                                                |
|        |          |                                                      | 3018                                                                                                                                                                                      | Wing phenotype                                                                                           |                                                                                                                                                                                                                                                                                  |                                                                                                                                                                                                |
| CG7899 | Acph-1   | Acid phosphatase 1                                   | 110470                                                                                                                                                                                    |                                                                                                          |                                                                                                                                                                                                                                                                                  |                                                                                                                                                                                                |
|        |          |                                                      | 3579                                                                                                                                                                                      | Wing phenotype                                                                                           |                                                                                                                                                                                                                                                                                  |                                                                                                                                                                                                |
| CG7913 | Pp2A-B'  | Pp2A-B'                                              | 22614                                                                                                                                                                                     |                                                                                                          |                                                                                                                                                                                                                                                                                  |                                                                                                                                                                                                |
|        |          |                                                      | 107057                                                                                                                                                                                    |                                                                                                          |                                                                                                                                                                                                                                                                                  |                                                                                                                                                                                                |
| CG7942 | ldhr     | lariat debranching                                   | 110582                                                                                                                                                                                    | Wing phenotype                                                                                           |                                                                                                                                                                                                                                                                                  |                                                                                                                                                                                                |

|        |         |                                            |                                                                         |                                                    |                                    |         |                            |                                                              |
|--------|---------|--------------------------------------------|-------------------------------------------------------------------------|----------------------------------------------------|------------------------------------|---------|----------------------------|--------------------------------------------------------------|
| CG8105 |         | ectonucleotidase enzyme                    | 7942R-4<br>104510<br>8037<br>2892<br>100052                             | Wing phenotype<br><br>Wing phenotype               |                                    |         |                            |                                                              |
| CG8402 | PpD3    | Protein phosphatase D3                     | 107386<br>24308<br>8402R-1                                              | Wing phenotype<br>Wing phenotype                   |                                    | 24308   | 24308<br>8402R-1           | Wing phenotype<br>Wing phenotype                             |
| CG8455 |         |                                            | 47953<br>8455R-2<br>108802<br>28915<br>8509R-2                          | Wing phenotype                                     |                                    |         |                            |                                                              |
| CG8509 |         |                                            |                                                                         | Wing phenotype                                     |                                    |         |                            |                                                              |
| CG8584 |         |                                            | 107849<br>26987<br>26988                                                | Wing phenotype                                     | 107849<br>26988                    | 26988   | 26988                      | Wing phenotype<br>Wing phenotype                             |
| CG8804 | wun     | wunen                                      | 6447<br>51090                                                           |                                                    |                                    |         |                            |                                                              |
| CG8805 | wun2    | wunen-2                                    | 103452<br>4176<br>4177<br>8805R-1<br>32423                              | Wing phenotype<br>Wing phenotype<br>Wing phenotype | 103452<br>4176<br>8805R-1<br>32423 | 4176    | 103452<br>4177<br>8805R-1  | Wing phenotype<br>Lethal<br>Wing phenotype<br>Wing phenotype |
| CG8822 | PpD6    | Protein phosphatase D6                     | 104211<br>36047                                                         |                                                    |                                    |         |                            |                                                              |
| CG8889 | Mppe    | Metallophosphoesterase                     | 108190<br>8889R-2                                                       | Wing phenotype                                     |                                    |         |                            |                                                              |
| CG8980 | NiPp1   | Nuclear inhibitor of Protein phosphatase 1 | 108859<br>42175                                                         |                                                    |                                    |         |                            |                                                              |
| CG9115 | mtm     | myotubularin                               | 29032<br>31552<br>9115R-1<br>9115R-2                                    |                                                    | 29032<br>9115R-1                   | 9115R-1 | 29032<br>9115R-1           | Wing phenotype<br>Wing phenotype                             |
| CG9128 | Sac1    | Sac1                                       | 37216<br>44376                                                          |                                                    |                                    |         |                            |                                                              |
| CG9151 | acj6    | abnormal chemosensory jump 6               | 9827<br>105292                                                          |                                                    |                                    |         |                            |                                                              |
| CG9156 | Pp1-13C | Protein phosphatase 1 at 13C               | 29057<br>107770                                                         | Lethal                                             | 9156R-1                            | 29057   | 29057<br>9156R-1<br>107770 | Wing phenotype<br>Lethal<br>Wing phenotype<br>Wing phenotype |
| CG9181 | Ptp61F  | tyrosine phosphatase 61F                   | 37436<br>108888<br>101474<br>39162<br>100593<br>24150<br>101546<br>2879 |                                                    |                                    |         |                            |                                                              |
| CG9236 | Cib2    | CIB2 ortholog                              |                                                                         |                                                    |                                    |         |                            |                                                              |
| CG9238 |         |                                            |                                                                         |                                                    |                                    |         |                            |                                                              |
| CG9267 |         |                                            |                                                                         |                                                    |                                    |         |                            |                                                              |
| CG9311 | mop     | myopic                                     | 104860<br>14174                                                         | Wing phenotype<br>Wing phenotype/<br>Lethal        |                                    | 14174   | 104860<br>14174<br>9311R-3 | Wing phenotype<br>Wing phenotype<br>Wing phenotype           |

|        |          |                                           |         |                                                                                                                                                                     |                |         |                                                                                   |                |                                                                                     |                                                                                     |                                                                                     |                                                                                     |                                                                                     |                                                                                     |                |
|--------|----------|-------------------------------------------|---------|---------------------------------------------------------------------------------------------------------------------------------------------------------------------|----------------|---------|-----------------------------------------------------------------------------------|----------------|-------------------------------------------------------------------------------------|-------------------------------------------------------------------------------------|-------------------------------------------------------------------------------------|-------------------------------------------------------------------------------------|-------------------------------------------------------------------------------------|-------------------------------------------------------------------------------------|----------------|
|        |          |                                           | 9311R-4 |   | Lethal         |         |                                                                                   |                |                                                                                     |                                                                                     |                                                                                     |                                                                                     |                                                                                     |                                                                                     |                |
| CG9351 | fifi     | falafel                                   | 24143   |                                                                                    | Wing phenotype |         |                                                                                   | 24143          |  | Wing phenotype                                                                      |  | 24143                                                                               |  | Wing phenotype                                                                      |                |
|        |          |                                           | 103793  |                                                                                    | Wing phenotype | 103793  |  | Wing phenotype |                                                                                     |                                                                                     |                                                                                     | 103793                                                                              |  | Wing phenotype                                                                      |                |
| CG9389 |          |                                           | 44663   |                                                                                                                                                                     |                |         |                                                                                   |                |                                                                                     |                                                                                     |                                                                                     |                                                                                     |                                                                                     |                                                                                     |                |
| CG9391 |          |                                           | 23723   |                                                                                                                                                                     |                |         |                                                                                   |                |                                                                                     |                                                                                     |                                                                                     |                                                                                     |                                                                                     |                                                                                     |                |
| CG9449 |          |                                           | 23725   |                                                                                                                                                                     |                |         |                                                                                   |                |                                                                                     |                                                                                     |                                                                                     |                                                                                     |                                                                                     |                                                                                     |                |
|        |          |                                           | 12895   |                                                                                                                                                                     |                |         |                                                                                   |                |                                                                                     |                                                                                     |                                                                                     |                                                                                     |                                                                                     |                                                                                     |                |
|        |          |                                           | 102991  |                                                                                                                                                                     |                |         |                                                                                   |                |                                                                                     |                                                                                     |                                                                                     |                                                                                     |                                                                                     |                                                                                     |                |
| CG9451 |          |                                           | 109721  |                                                                                                                                                                     |                |         |                                                                                   |                |                                                                                     |                                                                                     |                                                                                     |                                                                                     |                                                                                     |                                                                                     |                |
|        |          |                                           | 14344   |                                                                                                                                                                     |                |         |                                                                                   |                |                                                                                     |                                                                                     |                                                                                     |                                                                                     |                                                                                     |                                                                                     |                |
| CG9452 |          |                                           | 100887  |                                                                                                                                                                     |                |         |                                                                                   |                |                                                                                     |                                                                                     |                                                                                     |                                                                                     |                                                                                     |                                                                                     |                |
|        |          |                                           | 51202   |                                                                                                                                                                     |                |         |                                                                                   |                |                                                                                     |                                                                                     |                                                                                     |                                                                                     |                                                                                     |                                                                                     |                |
| CG9493 | Pez      | Pez                                       | 108301  |                                                                                    | Wing phenotype | 108301  |  |                |                                                                                     |                                                                                     |                                                                                     | 108301                                                                              |  | Wing phenotype                                                                      |                |
|        |          |                                           | 9493R-3 |                                                                                    | Wing phenotype |         |                                                                                   |                |                                                                                     |                                                                                     |                                                                                     | 9493R-3                                                                             |  | Wing phenotype                                                                      |                |
|        |          |                                           | 40743   |                                                                                    | Wing phenotype | 9493R-2 |                                                                                   |                |                                                                                     |                                                                                     |                                                                                     | 9493R-2                                                                             |  | Wing phenotype                                                                      |                |
|        |          |                                           |         |                                                                                                                                                                     |                | 40743   |  | Lethal         | 40743                                                                               |  | Wing phenotype                                                                      |  | 40743                                                                               |  | Wing phenotype |
| CG9554 | eya      | eyes absent                               | 43911   |                                                                                    | Wing phenotype |         |                                                                                   |                | 43911                                                                               |  |  | 43911                                                                               |  | Wing phenotype                                                                      |                |
|        |          |                                           | 108071  |                                                                                                                                                                     |                | 108071  |  | Wing phenotype |                                                                                     |                                                                                     |                                                                                     | 108071                                                                              |                                                                                     | Wing phenotype                                                                      |                |
|        |          |                                           | 28733   |                                                                                                                                                                     |                | 28733   |  |                |                                                                                     |                                                                                     |                                                                                     | 28733                                                                               |  | Wing phenotype                                                                      |                |
| CG9601 |          |                                           | 24070   |                                                                                                                                                                     |                |         |                                                                                   |                |                                                                                     |                                                                                     |                                                                                     |                                                                                     |                                                                                     |                                                                                     |                |
|        |          |                                           | 108251  |                                                                                                                                                                     |                |         |                                                                                   |                |                                                                                     |                                                                                     |                                                                                     |                                                                                     |                                                                                     |                                                                                     |                |
| CG9619 | Gbs-76A  | Glycogen binding subunit 76A              | 103044  |                                                                                                                                                                     |                |         |                                                                                   |                |                                                                                     |                                                                                     |                                                                                     |                                                                                     |                                                                                     |                                                                                     |                |
|        |          |                                           | 36121   |                                                                                                                                                                     |                |         |                                                                                   |                |                                                                                     |                                                                                     |                                                                                     |                                                                                     |                                                                                     |                                                                                     |                |
| CG9764 | yrt      | yurt                                      | 28674   |                                                                                                                                                                     |                |         |                                                                                   |                |                                                                                     |                                                                                     |                                                                                     |                                                                                     |                                                                                     |                                                                                     |                |
|        |          |                                           | 107016  |                                                                                                                                                                     |                |         |                                                                                   |                |                                                                                     |                                                                                     |                                                                                     |                                                                                     |                                                                                     |                                                                                     |                |
| CG9784 |          |                                           | 108075  |                                                                                                                                                                     |                |         |                                                                                   |                |                                                                                     |                                                                                     |                                                                                     |                                                                                     |                                                                                     |                                                                                     |                |
|        |          |                                           | 30098   |                                                                                                                                                                     | Wing phenotype |         |                                                                                   |                |                                                                                     |                                                                                     |                                                                                     |                                                                                     |                                                                                     |                                                                                     |                |
| CG9801 |          |                                           | 104525  |                                                                                                                                                                     |                |         |                                                                                   |                |                                                                                     |                                                                                     |                                                                                     |                                                                                     |                                                                                     |                                                                                     |                |
| CG9819 | CanA-14F | Calcineurin A at 14F                      | 109858  |                                                                                                                                                                     | Wing phenotype |         |                                                                                   |                |                                                                                     |                                                                                     |                                                                                     |                                                                                     |                                                                                     |                                                                                     |                |
|        |          |                                           | 30105   |                                                                                                                                                                     |                |         |                                                                                   |                |                                                                                     |                                                                                     |                                                                                     |                                                                                     |                                                                                     |                                                                                     |                |
| CG9842 | Pp2B-14D | phosphatase 2B at 14D                     | 46873   |                                                                                                                                                                     |                |         |                                                                                   |                |                                                                                     |                                                                                     |                                                                                     |                                                                                     |                                                                                     |                                                                                     |                |
|        |          |                                           | 103144  |                                                                                                                                                                     |                |         |                                                                                   |                |                                                                                     |                                                                                     |                                                                                     |                                                                                     |                                                                                     |                                                                                     |                |
| CG9856 | PTP-ER   | phosphatase-tyrosine ERK/Enhancer of Ras1 | 9856R-1 |                                                                                                                                                                     |                |         |                                                                                   |                |                                                                                     |                                                                                     |                                                                                     |                                                                                     |                                                                                     |                                                                                     |                |
|        |          |                                           | 9856R-2 |                                                                                                                                                                     |                |         |                                                                                   |                |                                                                                     |                                                                                     |                                                                                     |                                                                                     |                                                                                     |                                                                                     |                |
|        |          |                                           | 32359   |                                                                                                                                                                     |                |         |                                                                                   |                |                                                                                     |                                                                                     |                                                                                     |                                                                                     |                                                                                     |                                                                                     |                |

Weak-Medium Decrease -0.2 to -0.5  
 Medium-Strong Decrease > -0.5  
 Weak-Medium Increase +0.2 to +0.5  
 Medium-Strong Increase > +0.5  
 No change

Transgenic RNAi Project strains are in blue font  
 National Institute of Genetics strains have the letter R in the stock number  
 All other strains are from Vienna Drosophila RNAi Center

Fig. S6

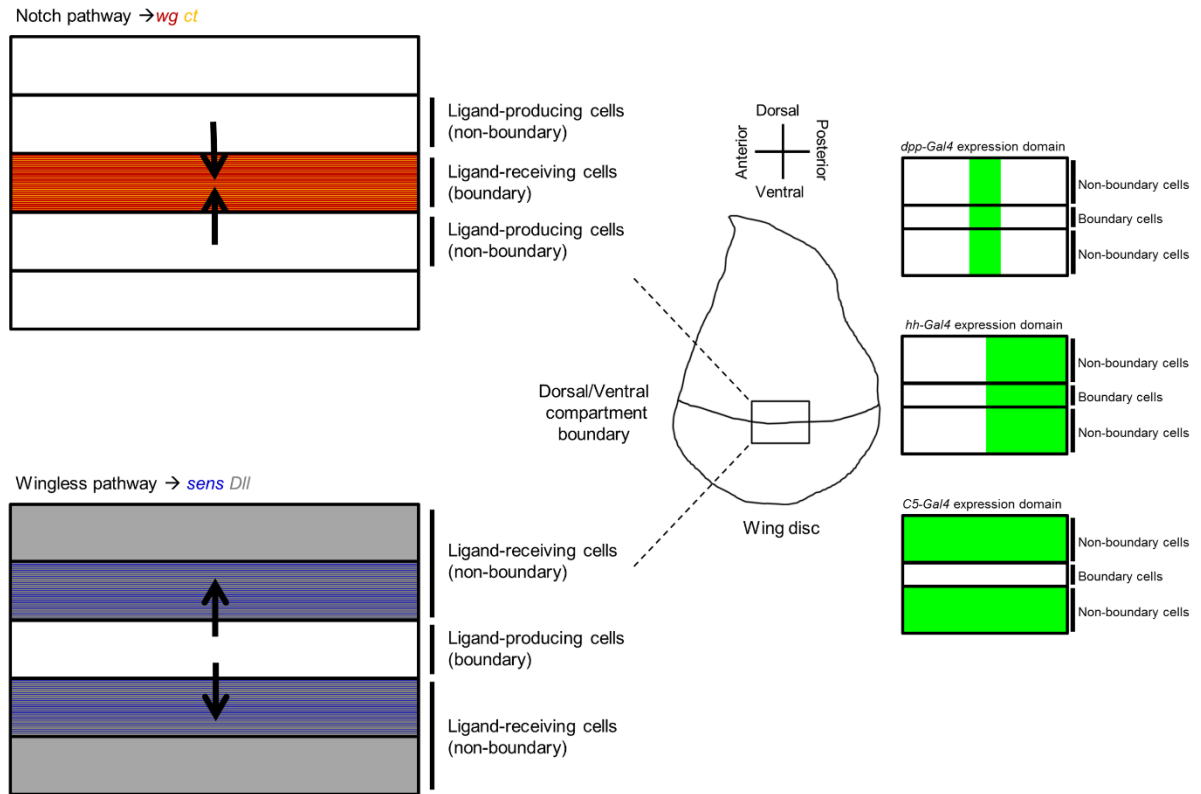

Fig. S7

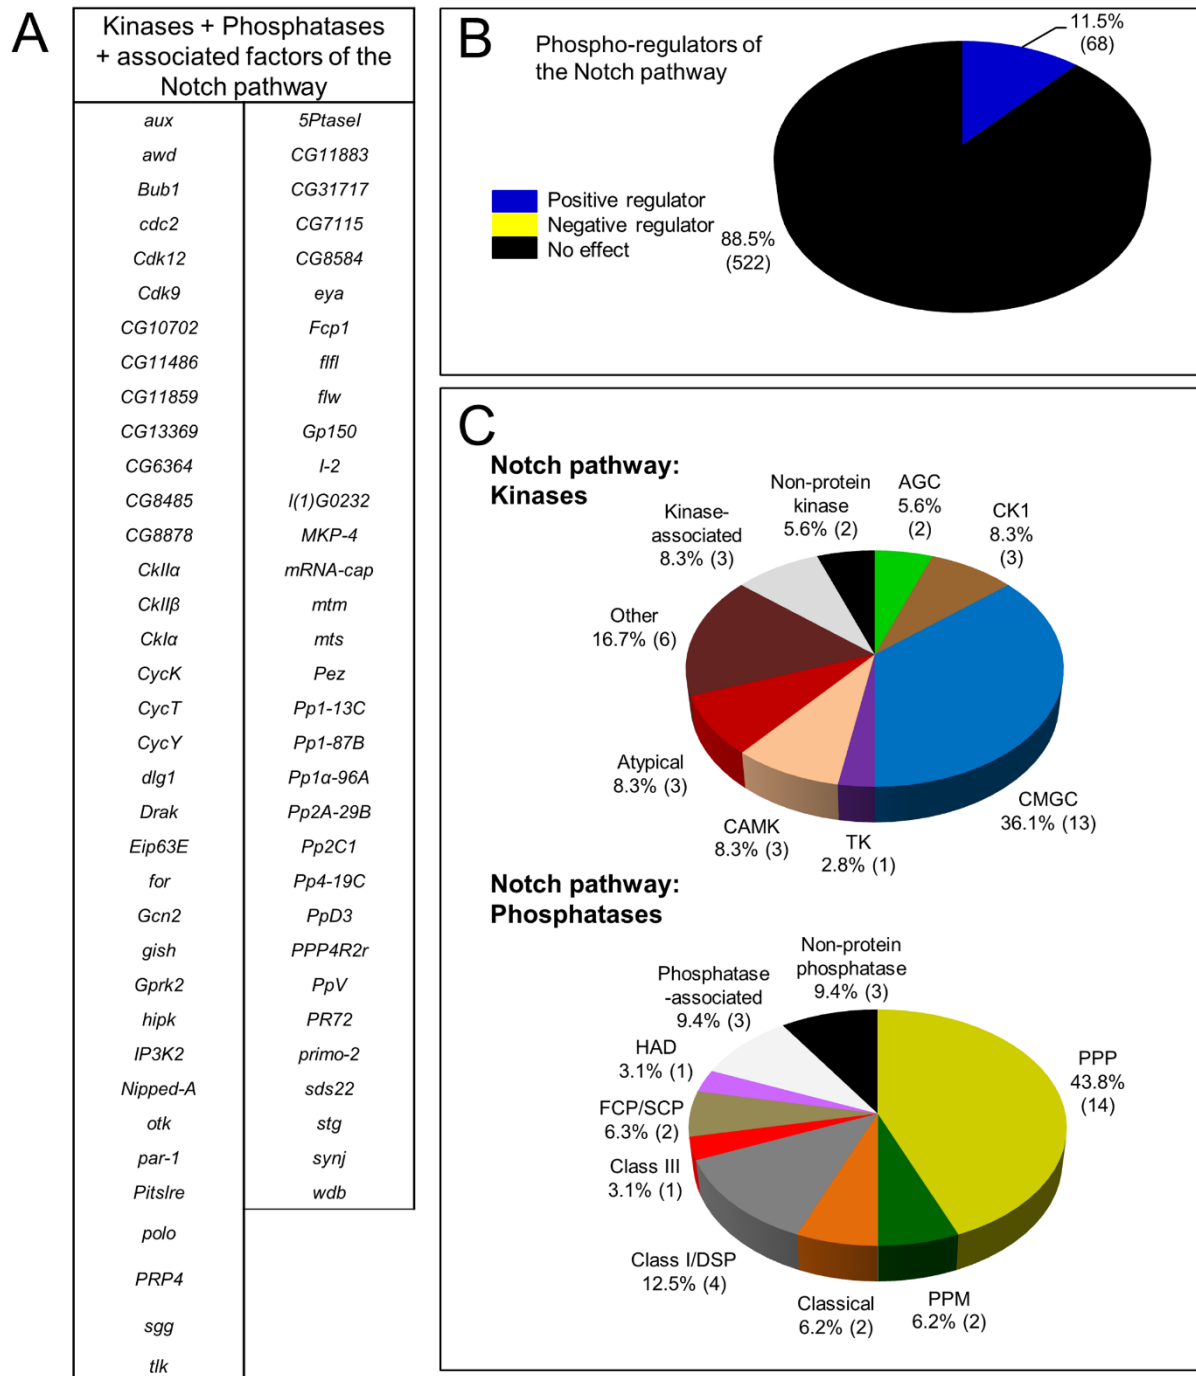

Fig. S8

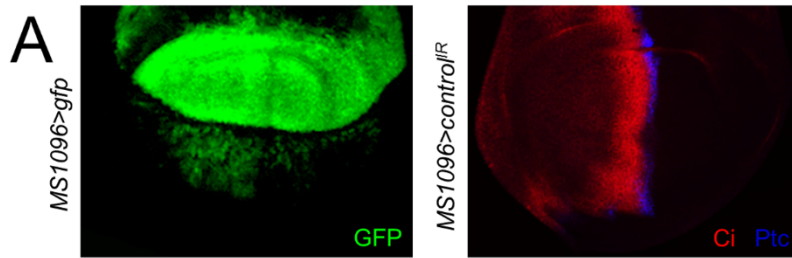

**B**

| Kinase<br>(+ associated factor) | Hedgehog<br>pathway | Phosphatase<br>(+ associated factor) | Hedgehog<br>pathway |
|---------------------------------|---------------------|--------------------------------------|---------------------|
| <i>aPKC</i>                     | Yellow              | <i>5Ptasel</i>                       | Black               |
| <i>aux</i>                      | Yellow              | <i>CG11883</i>                       | Yellow              |
| <i>awd</i>                      | Yellow              | <i>CG31717</i>                       | Black               |
| <i>Bub1</i>                     | Yellow              | <i>CG3530</i>                        | Black               |
| <i>cdc2</i>                     | Yellow              | <i>CG7115</i>                        | Yellow              |
| <i>Cdc37</i>                    | Yellow              | <i>CG8584</i>                        | Black               |
| <i>Cdk12</i>                    | Yellow              | <i>csw</i>                           | Black               |
| <i>Cdk9</i>                     | Blue                | <i>eya</i>                           | Black               |
| <i>CG10702</i>                  | Black               | <i>Fcp1</i>                          | Yellow              |
| <i>CG11486</i>                  | Black               | <i>ffl</i>                           | Yellow              |
| <i>CG11859</i>                  | Yellow              | <i>flw</i>                           | Blue                |
| <i>CG13369</i>                  | Yellow              | <i>Gp150</i>                         | Yellow              |
| <i>CG6364</i>                   | Yellow              | <i>I-2</i>                           | Yellow              |
| <i>CG676</i>                    | Black               | <i>I(1)G0232</i>                     | Black               |
| <i>CG8485</i>                   | Black               | <i>Mbs</i>                           | Yellow              |
| <i>CG8878</i>                   | Black               | <i>MKP-4</i>                         | Black               |
| <i>CkIIa</i>                    | Blue                | <i>mop</i>                           | Black               |
| <i>CkIIβ</i>                    | Blue                | <i>mRNA-cap</i>                      | Blue                |
| <i>Ckla</i>                     | Yellow              | <i>mtm</i>                           | Blue                |
| <i>CycA</i>                     | Yellow              | <i>mts</i>                           | Blue                |
| <i>CycK</i>                     | Yellow              | <i>MYPT-75D</i>                      | Yellow              |
| <i>CycT</i>                     | Blue                | <i>Pez</i>                           | Black               |
| <i>CycY</i>                     | Blue                | <i>Pp1-13C</i>                       | Yellow              |
| <i>dco</i>                      | Yellow              | <i>Pp1-87B</i>                       | Yellow              |
| <i>dlg1</i>                     | Yellow              | <i>Pp1α-96A</i>                      | Yellow              |
| <i>Drak</i>                     | Blue                | <i>Pp2A-29B</i>                      | Yellow              |
| <i>Dsor1</i>                    | Blue                | <i>Pp2C1</i>                         | Black               |
| <i>Egfr</i>                     | Blue                | <i>Pp4-19C</i>                       | Yellow              |
| <i>Eip63E</i>                   | Blue                | <i>PpD3</i>                          | Yellow              |
| <i>for</i>                      | Yellow              | <i>PPP4R2r</i>                       | Yellow              |
| <i>fs(1)h</i>                   | Blue                | <i>PpV</i>                           | Yellow              |
| <i>Gcn2</i>                     | Yellow              | <i>PR72</i>                          | Blue                |
| <i>gish</i>                     | Blue                | <i>primo-2</i>                       | Black               |
| <i>Gprk2</i>                    | Blue                | <i>sds22</i>                         | Black               |
| <i>hipk</i>                     | Blue                | <i>stg</i>                           | Yellow              |
| <i>ial</i>                      | Yellow              | <i>synj</i>                          | Yellow              |
| <i>IP3K2</i>                    | Yellow              | <i>tw</i>                            | Blue                |
| <i>Nipped-A</i>                 | Yellow              | <i>wdb</i>                           | Blue                |
| <i>otk</i>                      | Black               | <i>wun2</i>                          | Black               |
| <i>par-1</i>                    | Black               |                                      |                     |
| <i>Pi4KIIa</i>                  | Blue                |                                      |                     |
| <i>Pitslre</i>                  | Yellow              |                                      |                     |
| <i>polo</i>                     | Yellow              |                                      |                     |
| <i>PRP4</i>                     | Yellow              |                                      |                     |
| <i>put</i>                      | Yellow              |                                      |                     |
| <i>sgg</i>                      | Yellow              |                                      |                     |
| <i>slpr</i>                     | Black               |                                      |                     |
| <i>smi35A</i>                   | Black               |                                      |                     |
| <i>tkv</i>                      | Yellow              |                                      |                     |
| <i>tlk</i>                      | Black               |                                      |                     |
| <i>Wnk</i>                      | Black               |                                      |                     |

■ Positive regulator  
■ Negative regulator  
■ No effect



Fig. S9

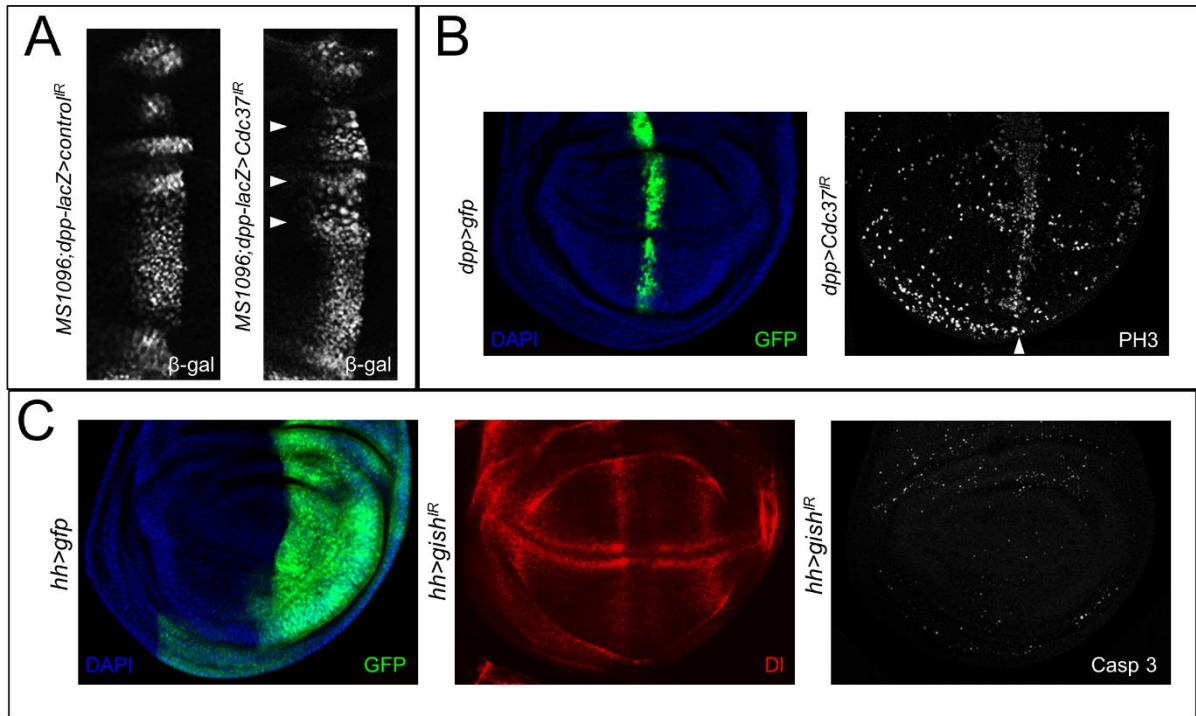

Supplement: dev116715supp.pdf [file dev116715supp.pdf]
